# Supplementary material for: Ecological conditions experienced by offspring during pregnancy and early post-natal life determine mandible size in roe deer
Source: PLoS One. 2019 Sep 11;14(9):e0222150. doi: 10.1371/journal.pone.0222150 (PMC6738612; doi:10.1371/journal.pone.0222150)
Supplement: S1 Dataset — Roe deer mandibular data (sheet 1), offspring and adult female data (sheet 2), hunting ground and population data (sheet 3), remote sensing data (sheet 4) and climate data (sheet 5) used in the present study. (XLS) [file pone.0222150.s001.xls]

## Sheet: Mandibular data x age class
Sample ID	Sex	Age class (months)	Mandible - Total length in mm (a in Fig. 1)
1	Female	3-4	106.51
2	Female	3-4	110.39
3	Female	3-4	112.45
4	Female	3-4	113.69
5	Female	3-4	108.28
6	Female	3-4	118.27
7	Female	3-4	109.01
8	Female	3-4	115.28
9	Female	3-4	118.01
10	Female	3-4	118.19
11	Female	3-4	115.82
12	Female	3-4	114.18
13	Female	3-4	113.22
14	Female	3-4	115.26
15	Female	3-4	112.97
16	Female	3-4	118.83
17	Female	3-4	118.18
18	Female	3-4	122.39
19	Female	3-4	116.51
20	Female	3-4	115.29
21	Female	3-4	116.77
22	Female	3-4	114.84
23	Female	3-4	118.19
24	Female	3-4	116.74
25	Female	3-4	121.27
26	Female	3-4	123.44
27	Female	3-4	116.77
28	Female	3-4	117.11
29	Female	3-4	119.85
30	Female	3-4	117.54
31	Female	3-4	118.29
32	Female	3-4	116.77
33	Female	3-4	122.11
34	Female	3-4	123.41
35	Female	3-4	108.16
36	Female	3-4	101.49
37	Female	3-4	108.1
38	Female	3-4	109.05
39	Female	3-4	113.29
40	Female	3-4	118.11
41	Female	3-4	113.06
42	Female	3-4	114.14
43	Female	3-4	111.49
44	Female	3-4	110.39
45	Female	3-4	117.47
46	Female	3-4	115.29
47	Female	3-4	116.59
48	Female	3-4	118.16
49	Female	3-4	118.83
50	Female	3-4	120.13
51	Female	3-4	117.83
52	Female	3-4	117.55
53	Female	3-4	119.19
54	Female	3-4	123.48
55	Female	3-4	124.14
56	Female	3-4	121.49
57	Female	3-4	120.16
58	Female	3-4	119.19
59	Female	3-4	123.47
60	Female	3-4	126.49
61	Female	3-4	124.74
62	Female	3-4	115.42
63	Female	3-4	120.11
64	Female	3-4	112.11
65	Female	3-4	120.14
66	Female	3-4	110.18
67	Female	3-4	108.11
68	Female	3-4	124.11
69	Female	3-4	115.41
70	Female	3-4	117.44
71	Female	3-4	122.39
72	Female	3-4	118.83
73	Female	3-4	104.67
74	Female	3-4	110.17
75	Female	3-4	119.28
76	Female	3-4	118.71
77	Female	3-4	106.2
78	Female	3-4	98.16
79	Female	3-4	106.77
80	Female	3-4	113.47
81	Female	3-4	110.19
82	Female	3-4	115.21
83	Female	3-4	118.14
84	Female	3-4	110.49
85	Female	3-4	115.26
86	Female	3-4	114.18
87	Female	3-4	119.16
88	Female	3-4	120.14
89	Female	3-4	100.13
90	Female	3-4	113.44
91	Female	3-4	115.97
92	Female	3-4	117.44
93	Female	3-4	116.52
94	Female	3-4	118.89
95	Female	3-4	118.85
96	Female	3-4	121.27
97	Female	3-4	109.06
98	Female	3-4	111.28
99	Female	3-4	115.29
100	Female	3-4	118.28
101	Female	3-4	112.3
102	Female	3-4	118.8
103	Female	3-4	120.64
104	Female	3-4	116.78
105	Female	3-4	122.16
106	Female	3-4	122.38
107	Female	3-4	120.2
108	Female	3-4	122.18
109	Female	3-4	96.41
110	Female	3-4	100.19
111	Female	3-4	105.08
112	Female	3-4	110.19
113	Female	3-4	115.94
114	Female	3-4	106.74
115	Female	3-4	113.69
116	Female	3-4	117.06
117	Female	3-4	114.77
118	Female	3-4	117.47
119	Female	3-4	118.83
120	Female	3-4	118.15
121	Female	3-4	118.83
122	Female	3-4	116.51
123	Female	3-4	94.95
124	Female	3-4	101.45
125	Female	3-4	108.01
126	Female	3-4	114.26
127	Female	3-4	117.85
128	Female	3-4	120.34
129	Female	3-4	96.77
130	Female	3-4	100.49
131	Female	3-4	108.16
132	Female	3-4	110.19
133	Female	3-4	114.11
134	Female	3-4	113.09
135	Female	3-4	115.08
136	Female	3-4	116.05
137	Female	3-4	118.16
138	Female	3-4	114.15
139	Female	3-4	118.85
140	Female	3-4	100.16
141	Female	3-4	103.44
142	Female	3-4	110.14
143	Female	3-4	113.49
144	Female	3-4	114.67
145	Female	3-4	115.28
146	Female	3-4	114.81
147	Female	3-4	118.14
148	Female	3-4	116.79
149	Female	3-4	116.81
150	Female	3-4	118.11
151	Female	3-4	121.85
152	Female	3-4	120.17
153	Female	3-4	122.81
154	Female	3-4	121.38
155	Female	3-4	121.95
156	Female	3-4	123.28
157	Female	3-4	100.36
158	Female	3-4	115.22
159	Female	3-4	103.29
160	Female	3-4	110.19
161	Female	3-4	112.77
162	Female	3-4	118.19
163	Female	3-4	115.97
164	Female	3-4	113.07
165	Female	3-4	117.44
166	Female	3-4	114.95
167	Female	3-4	113.48
168	Female	3-4	114.77
169	Female	3-4	117.94
170	Female	3-4	117.44
171	Female	3-4	113.09
172	Female	3-4	121.49
173	Female	3-4	123.29
174	Female	3-4	118.49
175	Female	3-4	109.1
176	Female	3-4	106.59
177	Female	3-4	103.49
178	Female	3-4	106.86
179	Female	3-4	103.14
180	Female	3-4	105.69
181	Female	3-4	116.51
182	Female	3-4	113.29
183	Female	3-4	115.23
184	Female	3-4	118.19
185	Female	3-4	114.8
186	Female	3-4	118.49
187	Female	3-4	116.23
188	Female	3-4	119.85
189	Female	3-4	117.23
190	Female	3-4	118.19
191	Female	3-4	121.31
192	Female	3-4	119.96
193	Female	3-4	117.44
194	Female	3-4	118.85
195	Female	3-4	123.26
196	Female	3-4	125.29
197	Female	3-4	105.91
198	Female	3-4	105.6
199	Female	3-4	110.19
200	Female	3-4	113.48
201	Female	3-4	115.26
202	Female	3-4	117.47
203	Female	3-4	118.85
204	Female	3-4	120.19
205	Female	3-4	117.56
206	Female	3-4	116.51
207	Female	3-4	117.96
208	Female	3-4	120.29
209	Female	3-4	128.34
210	Female	3-4	101.06
211	Female	3-4	116.29
212	Female	3-4	110.16
213	Female	3-4	101.96
214	Female	3-4	104.95
215	Female	3-4	116.29
216	Female	3-4	116.82
217	Female	3-4	110.19
218	Female	3-4	112.36
219	Female	3-4	117.44
220	Female	3-4	118.14
221	Female	3-4	113.06
222	Female	3-4	115.29
223	Female	3-4	113.09
224	Female	3-4	116.29
225	Female	3-4	118.16
226	Female	3-4	118.89
227	Female	3-4	121.39
228	Female	3-4	118.16
229	Female	3-4	121.32
230	Female	3-4	122.86
231	Female	3-4	122.29
232	Female	3-4	124.78
233	Female	3-4	96.45
234	Female	3-4	100.38
235	Female	3-4	108.86
236	Female	3-4	107.58
237	Female	3-4	110.85
238	Female	3-4	110.16
239	Female	3-4	113.29
240	Female	3-4	117.26
241	Female	3-4	115.22
242	Female	3-4	118.11
243	Female	3-4	103.44
244	Female	3-4	100.17
245	Female	3-4	109.16
246	Female	3-4	115.29
247	Female	3-4	116.94
248	Female	3-4	116.51
249	Female	3-4	113.47
250	Female	3-4	114.33
251	Female	3-4	120.19
252	Female	3-4	124.14
253	Female	3-4	105.29
254	Female	3-4	116.47
255	Female	3-4	121.48
256	Female	3-4	115.44
257	Female	3-4	103.11
258	Female	3-4	122.47
259	Female	3-4	97.48
260	Female	3-4	100.38
261	Female	3-4	101.46
262	Female	3-4	106.77
263	Female	3-4	110.68
264	Female	3-4	117.18
265	Female	3-4	117.85
266	Female	3-4	115.01
267	Female	3-4	116.05
268	Female	3-4	116.94
269	Female	3-4	117.16
270	Female	3-4	116.51
271	Female	3-4	120.38
272	Female	3-4	122.16
273	Female	3-4	121.59
274	Female	3-4	106.28
275	Female	3-4	126.44
276	Female	3-4	123.28
277	Female	3-4	115.2
278	Female	3-4	113.44
279	Female	3-4	108.05
280	Female	3-4	109.24
281	Female	3-4	125.69
282	Female	3-4	110.18
283	Female	3-4	122.31
284	Female	3-4	106.11
285	Female	3-4	123.28
286	Female	3-4	110.17
287	Female	3-4	114.11
288	Female	3-4	113.29
289	Female	3-4	111.49
290	Female	3-4	110.18
291	Female	3-4	116.47
292	Female	3-4	116.94
293	Female	3-4	115.24
294	Female	3-4	117.83
295	Female	3-4	117.44
296	Female	3-4	118.89
297	Female	3-4	117.81
298	Female	3-4	117.56
299	Female	3-4	120.74
300	Female	3-4	120.94
301	Female	3-4	128.22
302	Female	3-4	124.09
303	Female	3-4	115.04
304	Female	3-4	112.57
305	Female	3-4	127.82
306	Female	3-4	107.66
307	Female	3-4	113.68
308	Female	3-4	106.84
309	Female	3-4	115.5
310	Female	3-4	117.74
311	Female	3-4	130.47
312	Female	3-4	116.43
313	Female	3-4	118.99
314	Female	3-4	121.24
315	Female	3-4	120.86
316	Female	3-4	117.42
317	Female	3-4	110.52
318	Female	3-4	107
319	Female	3-4	117.91
320	Female	3-4	115.44
321	Female	3-4	128.07
322	Female	3-4	118.98
323	Female	3-4	111.23
324	Female	3-4	119.22
325	Female	3-4	120.46
326	Female	3-4	119.82
327	Female	3-4	124.66
328	Female	3-4	112.41
329	Female	3-4	104.1
330	Female	3-4	119.82
331	Female	3-4	121.32
332	Female	3-4	123.33
333	Female	3-4	122.08
334	Female	3-4	107.66
335	Female	3-4	125.29
336	Female	3-4	114.16
337	Female	3-4	114.03
338	Female	3-4	118.1
339	Female	3-4	104.59
340	Female	3-4	124.51
341	Female	3-4	125.6
342	Female	3-4	115.45
343	Female	3-4	115.9
344	Female	3-4	116.25
345	Female	3-4	123.45
346	Female	3-4	128.62
347	Female	3-4	129
348	Female	3-4	116.55
349	Female	3-4	119.88
350	Female	3-4	110.18
351	Female	3-4	126.9
352	Female	3-4	111.19
353	Female	3-4	115.66
354	Female	3-4	117.88
355	Female	3-4	116.03
356	Female	3-4	117.39
357	Female	3-4	118.82
358	Female	3-4	115
359	Female	3-4	123.9
360	Female	3-4	121.42
361	Female	3-4	125.92
362	Female	3-4	115.6
363	Female	3-4	111.64
364	Female	3-4	115.79
365	Female	3-4	130.87
366	Female	3-4	116.99
367	Female	3-4	117.88
368	Female	3-4	120.5
369	Female	3-4	117.72
370	Female	3-4	117.3
371	Female	3-4	113.66
372	Female	3-4	120.38
373	Female	3-4	120
374	Female	3-4	113.18
375	Female	3-4	125.7
376	Female	3-4	117.35
377	Female	3-4	128.32
378	Female	3-4	109.97
379	Female	3-4	119.16
380	Female	3-4	126.95
381	Female	3-4	112.97
382	Female	3-4	116.24
383	Female	3-4	123.88
384	Female	3-4	120.07
385	Female	3-4	106.08
386	Female	3-4	118.52
387	Female	3-4	115.05
388	Female	3-4	117.41
389	Female	3-4	114.34
390	Female	3-4	110.4
391	Female	3-4	113.82
392	Female	3-4	112.39
393	Female	3-4	118.63
394	Female	3-4	111.13
395	Female	3-4	117.36
396	Female	3-4	123.52
397	Female	3-4	126.79
398	Female	3-4	115.67
399	Female	3-4	121.73
400	Female	3-4	122.56
401	Female	3-4	118.91
402	Female	3-4	113.46
403	Female	3-4	116.56
404	Female	3-4	119.07
405	Female	3-4	126.06
406	Female	3-4	128.96
407	Female	3-4	123.75
408	Female	3-4	119.5
409	Female	3-4	116.48
410	Female	3-4	127.2
411	Female	3-4	116.65
412	Female	3-4	108.98
413	Female	3-4	124.69
414	Female	3-4	114.46
415	Female	3-4	114.41
416	Female	3-4	124
417	Female	3-4	127.04
418	Female	3-4	131.31
419	Female	3-4	108.21
420	Female	3-4	112.79
421	Female	3-4	110.08
422	Female	3-4	119.66
423	Female	3-4	119.04
424	Female	3-4	123.1
425	Female	3-4	127.47
426	Female	3-4	109.62
427	Female	3-4	119.79
428	Female	3-4	116.29
429	Female	3-4	118
430	Female	3-4	116.53
431	Female	3-4	119.8
432	Female	3-4	124.48
433	Female	3-4	113.9
434	Female	3-4	116.4
435	Female	3-4	111.34
436	Female	3-4	118.13
437	Female	3-4	119.95
438	Female	3-4	117.66
439	Female	3-4	116.13
440	Female	3-4	117.07
441	Female	3-4	117.68
442	Female	3-4	113.06
443	Female	3-4	114.71
444	Female	3-4	119.19
445	Female	3-4	118.51
446	Female	3-4	119.86
447	Female	3-4	118.64
448	Female	3-4	111.22
449	Female	3-4	123.29
450	Female	3-4	114.02
451	Female	3-4	115.52
452	Female	3-4	117.36
453	Female	3-4	114.85
454	Female	3-4	112.77
455	Female	3-4	118.89
456	Female	3-4	105.74
457	Female	3-4	117.28
458	Female	3-4	118.14
459	Female	3-4	117.76
460	Female	3-4	110.39
461	Female	3-4	111.48
462	Female	3-4	116.55
463	Female	3-4	112.24
464	Female	3-4	112.66
465	Female	3-4	123.42
466	Female	3-4	120.76
467	Female	3-4	114.75
468	Female	3-4	116
469	Female	3-4	128.58
470	Female	3-4	112.73
471	Female	3-4	113.28
472	Female	3-4	116.56
473	Female	3-4	115.03
474	Female	3-4	127.44
475	Female	3-4	110.5
476	Female	3-4	113.6
477	Female	3-4	126.69
478	Female	3-4	119.14
479	Female	3-4	120.01
480	Female	3-4	115.71
481	Female	3-4	113.87
482	Female	3-4	115.39
483	Female	3-4	126.58
484	Female	3-4	105.57
485	Female	3-4	114.57
486	Female	3-4	122.56
487	Female	3-4	115.79
488	Female	3-4	112.3
489	Female	3-4	116.53
490	Female	3-4	116.57
491	Female	3-4	108.9
492	Female	3-4	111.27
493	Female	3-4	112.26
494	Female	3-4	125.82
495	Female	3-4	115.09
496	Female	3-4	112.91
497	Female	3-4	130.06
498	Female	3-4	110.57
499	Female	3-4	112.88
500	Female	3-4	116.76
501	Female	3-4	118.98
502	Female	3-4	120.48
503	Female	3-4	113.06
504	Female	3-4	111.14
505	Female	3-4	113.8
506	Female	3-4	123.98
507	Female	3-4	121.26
508	Female	3-4	113.61
509	Female	3-4	113.31
510	Female	3-4	97.03
511	Female	3-4	115.23
512	Female	3-4	119.56
513	Female	3-4	117.27
514	Female	3-4	117.31
515	Female	3-4	116.04
516	Female	3-4	99.15
517	Female	3-4	115.73
518	Female	3-4	117.1
519	Female	3-4	112.13
520	Female	3-4	114.72
521	Female	3-4	120.21
522	Female	3-4	120.33
523	Female	3-4	115.28
524	Female	3-4	114.8
525	Female	3-4	111.7
526	Female	3-4	117.11
527	Female	3-4	124.8
528	Female	3-4	116.05
529	Female	3-4	115.24
530	Female	3-4	121.59
531	Female	3-4	107.61
532	Female	3-4	120.55
533	Female	3-4	116.96
534	Female	3-4	127.66
535	Female	3-4	123.39
536	Female	3-4	112.05
537	Female	3-4	117.23
538	Female	3-4	121.24
539	Female	3-4	121.26
540	Female	3-4	108.2
541	Female	3-4	118.46
542	Female	3-4	105.67
543	Female	3-4	122.11
544	Female	3-4	116.49
545	Female	3-4	122.83
546	Female	3-4	125.23
547	Female	3-4	125.6
548	Female	3-4	131.3
549	Female	3-4	120.09
550	Female	3-4	119.78
551	Female	3-4	110.84
552	Female	3-4	120.28
553	Female	3-4	123.62
554	Female	3-4	118.6
555	Female	3-4	121.45
556	Female	3-4	125.38
557	Female	3-4	119.42
558	Female	3-4	125.12
559	Female	3-4	123.8
560	Female	3-4	131.13
561	Female	3-4	124.51
562	Female	3-4	125.55
563	Female	3-4	119.58
564	Female	3-4	115.55
565	Female	3-4	115.88
566	Female	3-4	116.21
567	Female	3-4	114.57
568	Female	3-4	129.52
569	Female	3-4	121.87
570	Female	3-4	117.16
571	Female	3-4	106.93
572	Female	3-4	110.15
573	Female	3-4	110.16
574	Female	3-4	108.78
575	Female	3-4	113.04
576	Female	3-4	112.69
577	Female	3-4	118.69
578	Female	3-4	117.64
579	Female	3-4	111.04
580	Female	3-4	113.44
581	Female	3-4	113.44
582	Female	3-4	116.54
583	Female	3-4	114.12
584	Female	3-4	111.36
585	Female	3-4	118.15
586	Female	3-4	119.15
587	Female	3-4	112.4
588	Female	3-4	109.13
589	Female	3-4	118.18
590	Female	3-4	108.03
591	Female	3-4	108.18
592	Female	3-4	109.27
593	Female	3-4	117.67
594	Female	3-4	118.15
595	Female	3-4	115.6
596	Female	3-4	119.15
597	Female	3-4	113.48
598	Female	3-4	121.28
599	Female	3-4	121.36
600	Female	3-4	111.19
601	Female	3-4	114.83
602	Female	3-4	123.66
603	Female	3-4	117.9
604	Female	3-4	123.47
605	Female	3-4	115.44
606	Female	3-4	113.19
607	Female	3-4	120.38
608	Female	3-4	115.66
609	Female	3-4	117.98
610	Female	3-4	122.64
611	Female	3-4	126.26
612	Female	3-4	123.05
613	Female	3-4	117.97
614	Female	3-4	111.13
615	Female	3-4	120.88
616	Female	3-4	119.68
617	Female	3-4	116.09
618	Female	3-4	111.81
619	Female	3-4	118.39
620	Female	3-4	121.23
621	Female	3-4	112.63
622	Female	3-4	111.11
623	Female	3-4	115.91
624	Female	3-4	119.33
625	Female	3-4	120.53
626	Female	3-4	116.16
627	Female	3-4	121.09
628	Female	3-4	112.05
629	Female	3-4	119.38
630	Female	3-4	118.82
631	Female	3-4	116.44
632	Female	3-4	123.06
633	Female	3-4	114.18
634	Female	3-4	112.78
635	Female	3-4	113.04
636	Female	3-4	108.92
637	Female	3-4	115.6
638	Female	3-4	122.88
639	Female	3-4	119.95
640	Female	3-4	115.9
641	Female	3-4	115.06
642	Female	3-4	113.17
643	Female	3-4	116.17
644	Female	3-4	118.21
645	Female	3-4	115.69
646	Female	3-4	116.04
647	Female	3-4	117.28
648	Female	3-4	115.48
649	Female	3-4	114.14
650	Female	3-4	123.2
651	Female	3-4	144.14
652	Female	3-4	106.49
653	Female	3-4	124.54
654	Female	3-4	115.03
655	Female	3-4	123.87
656	Female	3-4	116.81
657	Female	3-4	112.47
658	Female	3-4	110.02
659	Female	3-4	122.93
660	Female	3-4	111.2
661	Female	3-4	123.64
662	Female	3-4	111.24
663	Female	3-4	111.92
664	Female	3-4	124.57
665	Female	3-4	108.95
666	Female	3-4	116.91
667	Female	3-4	116.12
668	Female	3-4	117.82
669	Female	3-4	116.05
670	Female	3-4	107.77
671	Female	3-4	115.14
672	Female	3-4	118.74
673	Female	3-4	111.97
674	Female	3-4	123.25
675	Female	3-4	120.38
676	Female	3-4	127.81
677	Female	3-4	118.14
678	Female	3-4	122.69
679	Female	3-4	120.25
680	Female	3-4	121.34
681	Female	3-4	124.69
682	Female	3-4	124.37
683	Female	3-4	118.8
684	Female	3-4	118.64
685	Female	3-4	116.95
686	Female	3-4	114.04
687	Female	3-4	113.67
688	Female	3-4	108.05
689	Female	3-4	123.14
690	Female	3-4	114.39
691	Female	3-4	119.39
692	Female	3-4	120.21
693	Female	3-4	110.14
694	Female	3-4	117.91
695	Female	3-4	120.14
696	Female	3-4	114.82
697	Female	3-4	115.91
698	Female	3-4	112
699	Female	3-4	112.91
700	Female	3-4	113.04
701	Female	3-4	108.47
702	Female	3-4	115.14
703	Female	3-4	118.38
704	Female	3-4	108.81
705	Female	3-4	120.21
706	Female	3-4	123.28
707	Female	3-4	116.44
708	Female	3-4	114.82
709	Female	3-4	115.04
710	Female	3-4	122.37
711	Female	3-4	118.17
712	Female	3-4	118.28
713	Female	3-4	121.25
714	Female	3-4	118.14
715	Female	3-4	116.59
716	Female	3-4	98.33
717	Female	3-4	127.56
718	Female	3-4	119.45
719	Female	3-4	103.75
720	Female	3-4	107.13
721	Female	3-4	124.26
722	Female	3-4	118.9
723	Female	3-4	115.92
724	Female	3-4	109.83
725	Female	3-4	112.19
726	Female	3-4	113.17
727	Female	3-4	108.04
728	Female	3-4	107.67
729	Female	3-4	112.18
730	Female	3-4	115.16
731	Female	3-4	116.29
732	Female	3-4	115.18
733	Female	3-4	112.08
734	Female	3-4	113.17
735	Female	3-4	118.14
736	Female	3-4	110.17
737	Female	3-4	116.18
738	Female	3-4	118.1
739	Female	3-4	115.64
740	Female	3-4	116.77
741	Female	3-4	117.44
742	Female	3-4	114.18
743	Female	3-4	119.18
744	Female	3-4	110.18
745	Female	3-4	111.44
746	Female	3-4	124.78
747	Female	3-4	108.82
748	Female	3-4	113.18
749	Female	3-4	111.48
750	Female	3-4	115.48
751	Female	3-4	118.38
752	Female	3-4	116.27
753	Female	3-4	115.28
754	Female	3-4	113.28
755	Female	3-4	113.19
756	Female	3-4	109.19
757	Female	3-4	122.27
758	Female	3-4	120.95
759	Female	3-4	114.54
760	Female	3-4	111.84
761	Female	3-4	110.43
762	Female	3-4	107.61
763	Female	3-4	115.55
764	Female	3-4	113
765	Female	3-4	117.38
766	Female	3-4	118.38
767	Female	3-4	116.54
768	Female	3-4	124.34
769	Female	3-4	122.69
770	Female	3-4	119.28
771	Female	3-4	121.31
772	Female	3-4	124.17
773	Female	3-4	124.67
774	Female	3-4	118.44
775	Female	3-4	119.82
776	Female	3-4	122.55
777	Female	3-4	117.67
778	Female	3-4	116.47
779	Female	3-4	121.31
780	Female	3-4	113.06
781	Female	3-4	118.26
782	Female	3-4	116.77
783	Female	3-4	114.04
784	Female	3-4	122.87
785	Female	3-4	105.42
786	Female	3-4	112.52
787	Female	3-4	129.24
788	Female	3-4	120.38
789	Female	3-4	114.3
790	Female	3-4	117.87
791	Female	3-4	122.7
792	Female	3-4	114.54
793	Female	3-4	122.93
794	Female	3-4	118.42
795	Female	3-4	124.46
796	Female	3-4	118.15
797	Female	3-4	129.31
798	Female	3-4	119.26
799	Female	3-4	119.79
800	Female	3-4	121.73
801	Female	3-4	110.76
802	Female	3-4	124.7
803	Female	3-4	111.04
804	Female	3-4	118.08
805	Female	3-4	128.48
806	Female	3-4	117.09
807	Female	3-4	110.9
808	Female	3-4	107.22
809	Female	3-4	128.82
810	Female	3-4	118.31
811	Female	3-4	106.83
812	Female	3-4	111.24
813	Female	3-4	113.62
814	Female	3-4	115.2
815	Female	3-4	115.41
816	Female	3-4	121.7
817	Female	3-4	118.33
818	Female	3-4	107.12
819	Female	3-4	117.32
820	Female	3-4	117.4
821	Female	3-4	116.55
822	Female	3-4	109.01
823	Female	3-4	111.33
824	Female	3-4	109.48
825	Female	3-4	114.15
826	Female	3-4	108.54
827	Female	3-4	120.71
828	Female	3-4	120.91
829	Female	3-4	123.27
830	Female	3-4	114.73
831	Female	3-4	114.99
832	Female	3-4	119.57
833	Female	3-4	118.16
834	Female	3-4	114.29
835	Female	3-4	122.59
836	Female	3-4	113.71
837	Female	3-4	118.14
838	Female	3-4	116.78
839	Female	3-4	110.63
840	Female	3-4	107.11
841	Female	3-4	116.21
842	Female	3-4	118.56
843	Female	3-4	121.93
844	Female	3-4	117.45
845	Female	3-4	112.82
846	Female	3-4	111.89
847	Female	3-4	118.55
848	Female	3-4	115.34
849	Female	3-4	115.73
850	Female	3-4	120.54
851	Female	3-4	124.14
852	Female	3-4	118.01
853	Female	3-4	118.29
854	Female	3-4	126.49
855	Female	3-4	110.34
856	Female	3-4	116.19
857	Female	3-4	111.4
858	Female	3-4	110.25
859	Female	3-4	122.09
860	Female	3-4	111.92
861	Female	3-4	125.4
862	Female	3-4	117.11
863	Female	3-4	118.65
864	Female	3-4	116.27
865	Female	3-4	116.54
866	Female	3-4	115.52
867	Female	3-4	119.01
868	Female	3-4	111.27
869	Female	3-4	114.34
870	Female	3-4	120.53
871	Female	3-4	116.49
872	Female	3-4	113.48
873	Female	3-4	128.5
874	Female	3-4	109.74
875	Female	3-4	124.6
876	Female	3-4	106.74
877	Female	3-4	116.03
878	Female	3-4	118.04
879	Female	3-4	111.12
880	Female	3-4	114.09
881	Female	3-4	110.84
882	Female	3-4	114.46
883	Female	3-4	125.53
884	Female	3-4	117.03
885	Female	3-4	107.39
886	Female	3-4	121.96
887	Female	3-4	118.39
888	Female	3-4	120.3
889	Female	3-4	117.27
890	Female	3-4	104.11
891	Female	3-4	121.64
892	Female	3-4	123.69
893	Female	3-4	119.14
894	Female	3-4	124.39
895	Female	3-4	115.72
896	Female	3-4	115.74
897	Female	3-4	112.08
898	Female	3-4	111.22
899	Female	3-4	116.09
900	Female	3-4	107.93
901	Female	3-4	122.61
902	Female	3-4	115.03
903	Female	3-4	121.43
904	Female	3-4	118.01
905	Female	3-4	115.98
906	Female	3-4	117.55
907	Female	3-4	126.78
908	Female	3-4	119.49
909	Female	3-4	106.48
910	Female	3-4	115.89
911	Female	3-4	105.23
912	Female	3-4	119.05
913	Female	3-4	115.15
914	Female	3-4	116.56
915	Female	3-4	129.03
916	Female	3-4	111.39
917	Female	3-4	114.92
918	Female	3-4	116.95
919	Female	3-4	115.94
920	Female	3-4	119.48
921	Female	3-4	120.95
922	Female	3-4	119.12
923	Female	3-4	104.24
924	Female	3-4	110.88
925	Female	3-4	119.9
926	Female	3-4	114.89
927	Female	3-4	113.35
928	Female	3-4	115.78
929	Female	3-4	118.79
930	Female	3-4	113.13
931	Female	3-4	109.39
932	Female	3-4	109.31
933	Female	3-4	109.68
934	Female	3-4	120.48
935	Female	3-4	121.91
936	Female	3-4	115.64
937	Female	3-4	118
938	Female	3-4	126.08
939	Female	3-4	113.65
940	Female	3-4	112.47
941	Female	3-4	122.15
942	Female	3-4	106.08
943	Female	3-4	112.71
944	Female	3-4	116.05
945	Female	3-4	112.93
946	Female	3-4	114.77
947	Female	3-4	103.5
948	Female	3-4	102.06
949	Female	3-4	116.86
950	Female	3-4	103.86
951	Female	3-4	119.82
952	Female	3-4	119.96
953	Female	3-4	124.37
954	Female	3-4	96.61
955	Female	3-4	119.38
956	Female	3-4	110.51
957	Female	3-4	115.9
958	Female	3-4	120.03
959	Female	3-4	123.28
960	Female	3-4	123.24
961	Female	3-4	124.28
962	Female	3-4	118.39
963	Female	3-4	126.47
964	Female	3-4	97.15
965	Female	3-4	112.82
966	Female	3-4	124.55
967	Female	3-4	117.34
968	Female	3-4	129.09
969	Female	3-4	114.18
970	Female	3-4	100.16
971	Female	3-4	126.81
972	Female	3-4	122.39
973	Female	3-4	118.86
974	Female	3-4	119.18
975	Female	3-4	117.8
976	Female	3-4	99.92
977	Female	3-4	117.67
978	Female	3-4	122.78
979	Female	3-4	123.36
980	Female	3-4	128.82
981	Female	3-4	110.01
982	Female	3-4	117.78
983	Female	3-4	118.12
984	Female	3-4	107.95
985	Female	3-4	117.59
986	Female	3-4	119.55
987	Female	3-4	119.2
988	Female	3-4	103.48
989	Female	3-4	106.06
990	Female	3-4	112.09
991	Female	3-4	113.8
992	Female	3-4	108.79
993	Female	3-4	112.06
994	Female	3-4	115.22
995	Female	3-4	114.69
996	Female	3-4	107.36
997	Female	3-4	116.77
998	Female	3-4	116.79
999	Female	3-4	113.66
1000	Female	3-4	114.68
1001	Female	3-4	123.79
1002	Female	3-4	111.35
1003	Female	3-4	130.38
1004	Female	3-4	116.37
1005	Female	3-4	124.02
1006	Female	3-4	121.13
1007	Female	3-4	120.32
1008	Female	3-4	106.66
1009	Female	3-4	112.05
1010	Female	3-4	110.85
1011	Female	3-4	119.86
1012	Female	3-4	114.44
1013	Female	3-4	105.62
1014	Female	3-4	122.13
1015	Female	3-4	123.07
1016	Female	3-4	122.61
1017	Female	3-4	113.55
1018	Female	3-4	108.83
1019	Female	3-4	115.84
1020	Female	3-4	113.66
1021	Female	3-4	117.47
1022	Female	3-4	115.69
1023	Female	3-4	107.48
1024	Female	3-4	121.28
1025	Female	3-4	118.17
1026	Female	3-4	117.03
1027	Female	3-4	118.19
1028	Female	3-4	124.17
1029	Female	3-4	117.51
1030	Female	3-4	121.82
1031	Female	3-4	109.14
1032	Female	3-4	123.44
1033	Female	3-4	128.09
1034	Female	3-4	117.64
1035	Female	3-4	117.43
1036	Female	3-4	119.15
1037	Female	3-4	127.66
1038	Female	3-4	105.97
1039	Female	3-4	126.19
1040	Female	3-4	125.68
1041	Female	3-4	117.86
1042	Female	3-4	111.53
1043	Female	3-4	106.14
1044	Female	3-4	116.98
1045	Female	3-4	106.39
1046	Female	3-4	114.35
1047	Female	3-4	109.75
1048	Female	3-4	129.82
1049	Female	3-4	113.58
1050	Female	3-4	121.79
1051	Female	3-4	119.32
1052	Female	3-4	117.78
1053	Female	3-4	110.56
1054	Female	3-4	118.95
1055	Female	3-4	123.42
1056	Female	3-4	118.07
1057	Female	3-4	115.78
1058	Female	3-4	121.7
1059	Female	3-4	129.1
1060	Female	3-4	107.25
1061	Female	3-4	112.11
1062	Female	3-4	99.2
1063	Female	3-4	107.8
1064	Female	3-4	108.8
1065	Female	3-4	119.92
1066	Female	3-4	120.42
1067	Female	3-4	124.23
1068	Female	3-4	118.28
1069	Female	3-4	122.8
1070	Female	3-4	109.1
1071	Female	3-4	108.92
1072	Female	3-4	122.81
1073	Female	3-4	113.97
1074	Female	3-4	118.79
1075	Female	3-4	111.81
1076	Female	3-4	111.9
1077	Female	3-4	112.06
1078	Female	3-4	123.32
1079	Female	3-4	115.8
1080	Female	3-4	113.92
1081	Female	3-4	122.41
1082	Female	3-4	120.96
1083	Female	3-4	115.04
1084	Female	3-4	107.87
1085	Female	3-4	129.67
1086	Female	3-4	112.6
1087	Female	3-4	113.99
1088	Female	3-4	122.68
1089	Female	3-4	111.07
1090	Female	3-4	122.46
1091	Female	3-4	140.66
1092	Female	3-4	118.98
1093	Female	3-4	118.66
1094	Female	3-4	111.56
1095	Female	3-4	115.06
1096	Female	3-4	119.85
1097	Female	3-4	113.1
1098	Female	3-4	115.63
1099	Female	3-4	114.5
1100	Female	3-4	107.41
1101	Female	3-4	119.27
1102	Female	3-4	112.79
1103	Female	3-4	117.06
1104	Female	3-4	118.68
1105	Female	3-4	127.46
1106	Female	3-4	117.64
1107	Female	3-4	120.18
1108	Female	3-4	121.16
1109	Female	3-4	107.37
1110	Female	3-4	123.48
1111	Female	3-4	119.85
1112	Female	3-4	114.19
1113	Female	3-4	108.18
1114	Female	3-4	118.63
1115	Female	3-4	121.47
1116	Female	3-4	102.71
1117	Female	3-4	122.2
1118	Female	3-4	117.89
1119	Female	3-4	127.21
1120	Female	3-4	119.49
1121	Female	3-4	113.5
1122	Female	3-4	128.06
1123	Female	3-4	104.04
1124	Female	3-4	121.23
1125	Female	3-4	121.29
1126	Female	3-4	123.93
1127	Female	3-4	116.04
1128	Female	3-4	113.38
1129	Female	3-4	112.97
1130	Female	3-4	121.06
1131	Female	3-4	107.58
1132	Female	3-4	110.93
1133	Female	3-4	127.51
1134	Female	3-4	119.19
1135	Female	3-4	118.84
1136	Female	3-4	106.6
1137	Female	3-4	118.49
1138	Female	3-4	133.29
1139	Female	3-4	113.95
1140	Female	3-4	99.95
1141	Female	3-4	110.82
1142	Female	3-4	107.28
1143	Female	3-4	119.84
1144	Female	3-4	116.48
1145	Female	3-4	120.32
1146	Female	3-4	104.37
1147	Female	3-4	116.56
1148	Female	3-4	108.94
1149	Female	3-4	114.42
1150	Female	3-4	124.54
1151	Female	3-4	120.41
1152	Female	3-4	100.15
1153	Female	3-4	97.07
1154	Female	3-4	153.23
1155	Female	3-4	111.24
1156	Female	3-4	120.11
1157	Female	3-4	120.25
1158	Female	3-4	118.03
1159	Female	3-4	104.58
1160	Female	3-4	100.42
1161	Female	3-4	118.88
1162	Female	3-4	119.02
1163	Female	3-4	122.93
1164	Female	3-4	103.47
1165	Female	3-4	121.22
1166	Female	3-4	115.99
1167	Female	3-4	110.05
1168	Female	3-4	107.75
1169	Female	3-4	99.83
1170	Female	3-4	118.91
1171	Female	3-4	110.04
1172	Female	3-4	108.76
1173	Female	3-4	111.62
1174	Female	3-4	112.89
1175	Female	3-4	114.29
1176	Female	3-4	120.1
1177	Female	3-4	114.11
1178	Female	3-4	118.01
1179	Female	3-4	118.45
1180	Female	3-4	117.06
1181	Female	3-4	121.54
1182	Female	3-4	111.45
1183	Female	3-4	109.94
1184	Female	3-4	116.88
1185	Female	3-4	124.71
1186	Female	3-4	115.93
1187	Female	3-4	110.07
1188	Female	3-4	113.41
1189	Female	3-4	115.29
1190	Female	3-4	112.46
1191	Female	3-4	108.22
1192	Female	3-4	126.25
1193	Female	3-4	114.27
1194	Female	3-4	107.44
1195	Female	3-4	107.27
1196	Female	3-4	123.33
1197	Female	3-4	106.8
1198	Female	3-4	107.25
1199	Female	3-4	112.21
1200	Female	3-4	104.54
1201	Female	3-4	117.2
1202	Female	3-4	114.06
1203	Female	3-4	112.86
1204	Female	3-4	118.12
1205	Female	3-4	113.01
1206	Female	3-4	117.08
1207	Female	3-4	108.76
1208	Female	3-4	117.82
1209	Female	3-4	112.13
1210	Female	3-4	114.91
1211	Female	3-4	113.78
1212	Female	3-4	115.33
1213	Female	3-4	117.15
1214	Female	3-4	102.77
1215	Female	3-4	116.67
1216	Female	3-4	107.24
1217	Female	3-4	111.31
1218	Female	3-4	115.9
1219	Female	3-4	111.72
1220	Female	3-4	122.43
1221	Female	3-4	123.19
1222	Female	3-4	127.8
1223	Female	3-4	124.69
1224	Female	3-4	117.51
1225	Female	3-4	120.57
1226	Female	3-4	110.66
1227	Female	3-4	114.71
1228	Female	3-4	117.68
1229	Female	3-4	109.58
1230	Female	3-4	103.85
1231	Female	3-4	109.11
1232	Female	3-4	110.92
1233	Female	3-4	113.25
1234	Female	3-4	109.18
1235	Female	3-4	109.95
1236	Female	3-4	110.11
1237	Female	3-4	109.13
1238	Female	3-4	121.1
1239	Female	3-4	114.54
1240	Female	3-4	127.48
1241	Female	3-4	122.67
1242	Female	3-4	110.12
1243	Female	3-4	116.59
1244	Female	3-4	96.93
1245	Female	3-4	110.36
1246	Female	3-4	119.91
1247	Female	3-4	126.77
1248	Female	3-4	117.36
1249	Female	3-4	120.94
1250	Female	3-4	116.53
1251	Female	3-4	119.84
1252	Female	3-4	107.8
1253	Female	3-4	117.5
1254	Female	3-4	110.91
1255	Female	3-4	121.81
1256	Female	3-4	121.98
1257	Female	3-4	113.69
1258	Female	3-4	115.04
1259	Female	3-4	117.56
1260	Female	3-4	119.02
1261	Female	3-4	116.17
1262	Female	3-4	115.02
1263	Female	3-4	114.66
1264	Female	3-4	111.54
1265	Female	3-4	115.36
1266	Female	3-4	118.78
1267	Female	3-4	114.23
1268	Female	3-4	113.78
1269	Female	3-4	120.35
1270	Female	3-4	112.81
1271	Female	3-4	115.64
1272	Female	3-4	122.23
1273	Female	3-4	117.64
1274	Female	3-4	122.96
1275	Female	3-4	113.84
1276	Female	3-4	129.28
1277	Female	3-4	114.18
1278	Female	3-4	109.9
1279	Female	3-4	117.57
1280	Female	3-4	113.79
1281	Female	3-4	124.1
1282	Female	3-4	110.46
1283	Female	3-4	119.65
1284	Female	3-4	116.31
1285	Female	3-4	115.82
1286	Female	3-4	120.23
1287	Female	3-4	105.91
1288	Female	3-4	117.66
1289	Female	3-4	107.77
1290	Female	3-4	122.61
1291	Female	3-4	118.16
1292	Female	3-4	110.16
1293	Female	3-4	122.65
1294	Female	3-4	108.72
1295	Female	3-4	105.27
1296	Female	3-4	121.17
1297	Female	3-4	110.89
1298	Female	3-4	112.47
1299	Female	3-4	102.96
1300	Female	3-4	109.87
1301	Female	3-4	108.16
1302	Female	3-4	115.43
1303	Female	3-4	121.61
1304	Female	3-4	111.67
1305	Female	3-4	114.83
1306	Female	3-4	118.53
1307	Female	3-4	111.97
1308	Female	3-4	111.97
1309	Female	3-4	105.57
1310	Female	3-4	114.39
1311	Female	3-4	121.86
1312	Female	3-4	117.98
1313	Female	3-4	117.06
1314	Female	3-4	119.08
1315	Female	3-4	108.28
1316	Female	3-4	117.31
1317	Female	3-4	123.4
1318	Female	3-4	112.14
1319	Female	3-4	108.06
1320	Female	3-4	113.72
1321	Female	3-4	121.2
1322	Female	3-4	110.82
1323	Female	3-4	108.96
1324	Female	3-4	111.24
1325	Female	3-4	120.23
1326	Female	3-4	122.03
1327	Female	3-4	109.06
1328	Female	3-4	113.88
1329	Female	3-4	112.54
1330	Female	3-4	112.41
1331	Female	3-4	119.06
1332	Female	3-4	108.59
1333	Female	3-4	122.85
1334	Female	3-4	128.77
1335	Female	3-4	118.96
1336	Female	3-4	124.76
1337	Female	3-4	140.17
1338	Female	3-4	122.3
1339	Female	3-4	115.22
1340	Female	3-4	114.08
1341	Female	3-4	121.46
1342	Female	3-4	106.97
1343	Female	3-4	118.14
1344	Female	3-4	113.26
1345	Female	3-4	122.51
1346	Female	3-4	118.93
1347	Female	3-4	118.56
1348	Female	3-4	114.86
1349	Female	3-4	113.81
1350	Female	3-4	118.56
1351	Female	3-4	113.06
1352	Female	3-4	102.8
1353	Female	3-4	111.2
1354	Female	3-4	110.91
1355	Female	3-4	109.78
1356	Female	3-4	114.05
1357	Female	3-4	112.54
1358	Female	3-4	112.97
1359	Female	3-4	122.53
1360	Female	3-4	111.4
1361	Female	3-4	112.75
1362	Female	3-4	115.42
1363	Female	3-4	110.7
1364	Female	3-4	122.45
1365	Female	3-4	114.68
1366	Female	3-4	125.72
1367	Female	3-4	115.12
1368	Female	3-4	112.09
1369	Female	3-4	129.94
1370	Female	3-4	102.31
1371	Female	3-4	123.15
1372	Female	3-4	103.52
1373	Female	3-4	114.96
1374	Female	3-4	114.32
1375	Female	3-4	120.47
1376	Female	3-4	128.26
1377	Female	3-4	114.57
1378	Female	3-4	110.8
1379	Female	3-4	117.63
1380	Female	3-4	120.08
1381	Female	3-4	124.95
1382	Female	3-4	103.26
1383	Female	3-4	119.95
1384	Female	3-4	125.8
1385	Female	3-4	128.05
1386	Female	3-4	111.81
1387	Female	3-4	119.32
1388	Female	3-4	109.91
1389	Female	3-4	116.7
1390	Female	3-4	118.43
1391	Female	3-4	120.34
1392	Female	3-4	120.95
1393	Female	3-4	124.16
1394	Female	3-4	118.91
1395	Female	3-4	118.06
1396	Female	3-4	110.56
1397	Female	3-4	109.16
1398	Female	3-4	109.93
1399	Female	3-4	124.95
1400	Female	3-4	124.78
1401	Female	3-4	115.59
1402	Female	3-4	113.18
1403	Female	3-4	112.29
1404	Female	3-4	107.34
1405	Female	3-4	118.46
1406	Female	3-4	112.18
1407	Female	3-4	111.25
1408	Female	3-4	105.74
1409	Female	3-4	123.04
1410	Female	3-4	109.41
1411	Female	3-4	120.68
1412	Female	3-4	116.3
1413	Female	3-4	114.62
1414	Female	3-4	122.63
1415	Female	3-4	105.68
1416	Female	3-4	117.53
1417	Female	3-4	118.49
1418	Female	3-4	123.58
1419	Female	3-4	96.73
1420	Female	3-4	112.89
1421	Female	3-4	123.09
1422	Female	3-4	127.91
1423	Female	3-4	118.23
1424	Female	3-4	117.26
1425	Female	3-4	116.82
1426	Female	3-4	122.58
1427	Female	3-4	120.89
1428	Female	3-4	111.99
1429	Female	3-4	124.53
1430	Female	3-4	121.58
1431	Female	3-4	118.14
1432	Female	3-4	117.03
1433	Female	3-4	117.77
1434	Female	3-4	118.88
1435	Female	3-4	101.36
1436	Female	3-4	102.82
1437	Female	3-4	119
1438	Female	3-4	129.02
1439	Female	3-4	124.33
1440	Female	3-4	114.78
1441	Female	3-4	117.22
1442	Female	3-4	116.25
1443	Female	3-4	112.67
1444	Female	3-4	116.03
1445	Female	3-4	112.7
1446	Female	3-4	105.06
1447	Female	3-4	115.14
1448	Female	3-4	113.29
1449	Female	3-4	114.06
1450	Female	3-4	114.18
1451	Female	3-4	113.89
1452	Female	3-4	96.92
1453	Female	3-4	117.34
1454	Female	3-4	118.31
1455	Female	3-4	115.54
1456	Female	3-4	126.45
1457	Female	3-4	126.72
1458	Female	3-4	111.18
1459	Female	3-4	115.75
1460	Female	3-4	113.09
1461	Female	3-4	114.79
1462	Female	3-4	107.65
1463	Female	3-4	104.82
1464	Female	3-4	114.75
1465	Female	3-4	114.13
1466	Female	3-4	117.85
1467	Female	3-4	119.1
1468	Female	3-4	116.29
1469	Female	3-4	120.11
1470	Female	3-4	108.76
1471	Female	3-4	121.77
1472	Female	3-4	126.65
1473	Female	3-4	124.35
1474	Female	3-4	125.57
1475	Female	3-4	120.75
1476	Female	3-4	114.77
1477	Female	3-4	114.15
1478	Female	3-4	107.18
1479	Female	3-4	112.21
1480	Female	3-4	106.99
1481	Female	3-4	114.94
1482	Female	3-4	107.07
1483	Female	3-4	116.36
1484	Female	3-4	115.41
1485	Female	3-4	116.47
1486	Female	3-4	116.01
1487	Female	3-4	111.53
1488	Female	3-4	119.34
1489	Female	3-4	107.71
1490	Female	3-4	113.84
1491	Female	3-4	123.28
1492	Female	3-4	119.84
1493	Female	3-4	113.76
1494	Female	3-4	116.14
1495	Female	3-4	111.54
1496	Female	3-4	125.66
1497	Female	3-4	105.27
1498	Female	3-4	120.91
1499	Female	3-4	112.85
1500	Female	3-4	108.08
1501	Female	3-4	120.64
1502	Female	3-4	99.4
1503	Female	3-4	110.57
1504	Female	3-4	106.02
1505	Female	3-4	127.92
1506	Female	3-4	125.19
1507	Female	3-4	116.36
1508	Female	3-4	105.6
1509	Female	3-4	117.12
1510	Female	3-4	120.17
1511	Female	3-4	110.96
1512	Female	3-4	115.09
1513	Female	3-4	118.34
1514	Female	3-4	108.44
1515	Female	3-4	120.09
1516	Female	3-4	111.54
1517	Female	3-4	108.39
1518	Female	3-4	115.94
1519	Female	3-4	120.78
1520	Female	3-4	118.24
1521	Female	3-4	105.66
1522	Female	3-4	110.57
1523	Female	3-4	119.67
1524	Female	3-4	111.04
1525	Female	3-4	116.75
1526	Female	3-4	109.81
1527	Female	3-4	111.47
1528	Female	3-4	118.16
1529	Female	3-4	118.98
1530	Female	3-4	111.01
1531	Female	3-4	117.38
1532	Female	3-4	115.47
1533	Female	3-4	107.86
1534	Female	3-4	122.88
1535	Female	3-4	104.99
1536	Female	3-4	106.88
1537	Female	3-4	112.62
1538	Female	3-4	112.12
1539	Female	3-4	111.67
1540	Female	3-4	98.43
1541	Female	3-4	129.05
1542	Female	3-4	105.72
1543	Female	3-4	123.13
1544	Female	3-4	111.5
1545	Female	3-4	100.47
1546	Female	3-4	108.91
1547	Female	3-4	111.82
1548	Female	3-4	105.83
1549	Female	3-4	119.11
1550	Female	3-4	118.58
1551	Female	3-4	121.85
1552	Female	3-4	122.84
1553	Female	3-4	124.59
1554	Female	3-4	117.86
1555	Female	3-4	117.9
1556	Female	3-4	120.87
1557	Female	3-4	115.89
1558	Female	3-4	111.28
1559	Female	3-4	108.45
1560	Female	3-4	110.42
1561	Female	3-4	109.29
1562	Female	3-4	108.09
1563	Female	3-4	107.82
1564	Female	3-4	118.34
1565	Female	3-4	113.92
1566	Female	3-4	111.04
1567	Female	3-4	109.27
1568	Female	3-4	112.26
1569	Female	3-4	121.68
1570	Female	3-4	111.66
1571	Female	3-4	115.66
1572	Female	3-4	114.55
1573	Female	3-4	119.44
1574	Female	3-4	114.22
1575	Female	3-4	114.07
1576	Female	3-4	114.84
1577	Female	3-4	117.91
1578	Female	3-4	120.84
1579	Female	3-4	116.26
1580	Female	3-4	115.83
1581	Female	3-4	115.61
1582	Female	3-4	109.64
1583	Female	3-4	110.74
1584	Female	3-4	123.79
1585	Female	3-4	110.5
1586	Female	3-4	112.58
1587	Female	3-4	115.3
1588	Female	3-4	108.43
1589	Female	3-4	121.28
1590	Female	3-4	120.73
1591	Female	3-4	125.23
1592	Female	3-4	109.25
1593	Female	3-4	119.18
1594	Female	3-4	124.82
1595	Female	3-4	115.16
1596	Female	3-4	113.84
1597	Female	3-4	110.02
1598	Female	3-4	120.79
1599	Female	3-4	109.83
1600	Female	3-4	103.28
1601	Female	3-4	121.13
1602	Female	3-4	123.8
1603	Female	3-4	111.97
1604	Female	3-4	107.47
1605	Female	3-4	113.66
1606	Female	3-4	114.18
1607	Female	3-4	108.3
1608	Female	3-4	112.94
1609	Female	3-4	116.4
1610	Female	3-4	109.31
1611	Female	3-4	113.69
1612	Female	3-4	104.21
1613	Female	3-4	104.23
1614	Female	3-4	125.93
1615	Female	3-4	107.19
1616	Female	3-4	110.17
1617	Female	3-4	114.17
1618	Female	3-4	122.02
1619	Female	3-4	112.69
1620	Female	3-4	111.38
1621	Female	3-4	120.38
1622	Female	3-4	114.32
1623	Female	3-4	117.67
1624	Female	3-4	113.17
1625	Female	3-4	116.91
1626	Female	3-4	117.16
1627	Female	3-4	123.71
1628	Female	3-4	121.13
1629	Female	3-4	112.2
1630	Female	3-4	114.91
1631	Female	3-4	123.48
1632	Female	3-4	119.81
1633	Female	3-4	116.14
1634	Female	3-4	113.09
1635	Female	3-4	120.74
1636	Female	3-4	123.36
1637	Female	3-4	109.26
1638	Female	3-4	104.45
1639	Female	3-4	107.67
1640	Female	3-4	138.28
1641	Female	3-4	118.15
1642	Female	3-4	110.77
1643	Female	3-4	107.32
1644	Female	3-4	115.22
1645	Female	3-4	112.65
1646	Female	3-4	115.22
1647	Female	3-4	114.55
1648	Female	3-4	118.56
1649	Female	3-4	120.24
1650	Female	3-4	123.14
1651	Female	3-4	120.35
1652	Female	3-4	113.48
1653	Female	3-4	116.4
1654	Female	3-4	106.41
1655	Female	3-4	123.76
1656	Female	3-4	113.09
1657	Female	3-4	120.43
1658	Female	3-4	110.44
1659	Female	3-4	116.4
1660	Female	3-4	120.49
1661	Female	3-4	110.83
1662	Female	3-4	119.95
1663	Female	3-4	127.91
1664	Female	3-4	120.63
1665	Female	3-4	112.11
1666	Female	3-4	124.05
1667	Female	3-4	117.82
1668	Female	3-4	116.46
1669	Female	3-4	119.42
1670	Female	3-4	121.76
1671	Female	3-4	118.09
1672	Female	3-4	115.95
1673	Female	3-4	116.59
1674	Female	3-4	116.2
1675	Female	3-4	113.69
1676	Female	3-4	121.02
1677	Female	3-4	111.18
1678	Female	3-4	120.52
1679	Female	3-4	120.18
1680	Female	3-4	125.1
1681	Female	3-4	121.76
1682	Female	3-4	118.11
1683	Female	3-4	122.8
1684	Female	3-4	115.45
1685	Female	3-4	108.44
1686	Female	3-4	116.25
1687	Female	3-4	114.92
1688	Female	3-4	110.32
1689	Female	3-4	128.73
1690	Female	3-4	118.45
1691	Female	3-4	109.39
1692	Female	3-4	109.14
1693	Female	3-4	112.83
1694	Female	3-4	116.13
1695	Female	3-4	108.46
1696	Female	3-4	104.36
1697	Female	3-4	109.15
1698	Female	3-4	119.37
1699	Female	3-4	114.06
1700	Female	3-4	111.39
1701	Female	3-4	119.77
1702	Female	3-4	120.17
1703	Female	3-4	122.09
1704	Female	3-4	111.53
1705	Female	3-4	115.74
1706	Female	3-4	122.6
1707	Female	3-4	119.32
1708	Female	3-4	111.05
1709	Female	3-4	121
1710	Female	3-4	110.33
1711	Female	3-4	105.31
1712	Female	3-4	116.54
1713	Female	3-4	123.96
1714	Female	3-4	122.33
1715	Female	3-4	119.83
1716	Female	3-4	113.76
1717	Female	3-4	130.2
1718	Female	3-4	115.31
1719	Female	3-4	112.37
1720	Female	3-4	123.5
1721	Female	3-4	122.66
1722	Female	3-4	108.21
1723	Female	3-4	107.59
1724	Female	3-4	119.64
1725	Female	3-4	118.23
1726	Female	3-4	119.24
1727	Female	3-4	110.99
1728	Female	3-4	119.87
1729	Female	3-4	115.59
1730	Female	3-4	118.72
1731	Female	3-4	121.89
1732	Female	3-4	120.59
1733	Female	3-4	104.45
1734	Female	3-4	104.11
1735	Female	3-4	111.5
1736	Female	3-4	117.96
1737	Female	3-4	109.9
1738	Female	3-4	121.36
1739	Female	3-4	113.3
1740	Female	3-4	111
1741	Female	3-4	119.91
1742	Female	3-4	115.53
1743	Female	3-4	100.43
1744	Female	3-4	125.42
1745	Female	3-4	114.77
1746	Female	3-4	111.2
1747	Female	3-4	112.83
1748	Female	3-4	121.03
1749	Female	3-4	112.7
1750	Female	3-4	114.39
1751	Female	3-4	114.9
1752	Female	3-4	107.22
1753	Female	3-4	102.49
1754	Female	3-4	112.49
1755	Female	3-4	119.13
1756	Female	3-4	115.75
1757	Female	3-4	108.45
1758	Female	3-4	119.05
1759	Female	3-4	118.98
1760	Female	3-4	111.54
1761	Female	3-4	106
1762	Female	3-4	115.96
1763	Female	3-4	114.09
1764	Female	3-4	108.28
1765	Female	3-4	108.8
1766	Female	3-4	122.44
1767	Female	3-4	124.62
1768	Female	3-4	124.65
1769	Female	3-4	117.53
1770	Female	3-4	116.77
1771	Female	3-4	119.53
1772	Female	3-4	131.11
1773	Female	3-4	111.25
1774	Female	3-4	123.26
1775	Female	3-4	132.6
1776	Female	3-4	116.3
1777	Female	3-4	123.21
1778	Female	3-4	117.58
1779	Female	3-4	127.89
1780	Female	3-4	114.27
1781	Female	3-4	121.13
1782	Female	3-4	117.58
1783	Female	3-4	101.72
1784	Female	3-4	122.35
1785	Female	3-4	112.49
1786	Female	3-4	113.6
1787	Female	3-4	105.04
1788	Female	3-4	120.18
1789	Female	3-4	117.07
1790	Female	3-4	102.51
1791	Female	3-4	97.97
1792	Female	3-4	97.96
1793	Female	3-4	103.96
1794	Female	3-4	91.69
1795	Female	3-4	118.19
1796	Female	3-4	115.22
1797	Female	3-4	111.59
1798	Female	3-4	122.7
1799	Female	3-4	120.57
1800	Female	3-4	101.66
1801	Female	3-4	115.41
1802	Female	3-4	113.71
1803	Female	3-4	119.29
1804	Female	3-4	124.33
1805	Female	3-4	108.06
1806	Female	3-4	121.47
1807	Female	3-4	125.86
1808	Female	3-4	119.93
1809	Female	3-4	119.92
1810	Female	3-4	121.46
1811	Female	3-4	114.57
1812	Female	3-4	113.5
1813	Female	3-4	116.65
1814	Female	3-4	113.52
1815	Female	3-4	114.85
1816	Female	3-4	110.16
1817	Female	3-4	110.02
1818	Female	3-4	121.56
1819	Female	3-4	123.98
1820	Female	3-4	123.24
1821	Female	3-4	113.22
1822	Female	3-4	121.31
1823	Female	3-4	112.48
1824	Female	3-4	122.5
1825	Female	3-4	112.27
1826	Female	3-4	120.77
1827	Female	3-4	111.95
1828	Female	3-4	114.01
1829	Female	3-4	114.38
1830	Female	3-4	123.51
1831	Female	3-4	119.91
1832	Female	3-4	115.24
1833	Female	3-4	112.55
1834	Female	3-4	116.12
1835	Female	3-4	125.02
1836	Female	3-4	108.1
1837	Female	3-4	122.04
1838	Female	3-4	122.48
1839	Female	3-4	110.72
1840	Female	3-4	113.25
1841	Female	3-4	121.75
1842	Female	3-4	114.53
1843	Female	3-4	120.67
1844	Female	3-4	111.68
1845	Female	3-4	113.86
1846	Female	3-4	116.95
1847	Female	3-4	117.25
1848	Female	3-4	109.17
1849	Female	3-4	108.97
1850	Female	3-4	114.05
1851	Female	3-4	122.42
1852	Female	3-4	122.78
1853	Female	3-4	114.8
1854	Female	3-4	136.81
1855	Female	3-4	113.39
1856	Female	3-4	115.02
1857	Female	3-4	113.78
1858	Female	3-4	120.03
1859	Female	3-4	120.68
1860	Female	3-4	122.97
1861	Female	3-4	130.59
1862	Female	3-4	126.19
1863	Female	3-4	118.69
1864	Female	3-4	116.61
1865	Female	3-4	112.34
1866	Female	3-4	118.41
1867	Female	3-4	115.37
1868	Female	3-4	128.17
1869	Female	3-4	126.56
1870	Female	3-4	124.61
1871	Female	3-4	116.34
1872	Female	3-4	120.04
1873	Female	3-4	115.08
1874	Female	3-4	109.98
1875	Female	3-4	127.37
1876	Female	3-4	124.35
1877	Female	3-4	106.71
1878	Female	3-4	124.79
1879	Female	3-4	128.88
1880	Female	3-4	133.18
1881	Female	3-4	120.16
1882	Female	3-4	116.43
1883	Female	3-4	122.06
1884	Female	3-4	113.68
1885	Female	3-4	120.06
1886	Female	3-4	117.71
1887	Female	3-4	128.08
1888	Female	3-4	119.06
1889	Female	3-4	122.04
1890	Female	3-4	116.94
1891	Female	3-4	118.87
1892	Female	3-4	117.66
1893	Female	3-4	118.83
1894	Female	3-4	109.79
1895	Female	3-4	117.38
1896	Female	3-4	131.72
1897	Female	3-4	131.57
1898	Female	3-4	115.78
1899	Female	3-4	120.73
1900	Female	3-4	114.97
1901	Female	3-4	113.31
1902	Female	3-4	115.37
1903	Female	3-4	124.07
1904	Female	3-4	116.23
1905	Female	3-4	121.36
1906	Female	3-4	119.37
1907	Female	3-4	119.01
1908	Female	3-4	120.2
1909	Female	3-4	125.74
1910	Female	3-4	122.75
1911	Female	3-4	112.45
1912	Female	3-4	109.49
1913	Female	3-4	115.42
1914	Female	3-4	110.84
1915	Female	3-4	113.47
1916	Female	3-4	118.63
1917	Female	3-4	107.78
1918	Female	3-4	114.95
1919	Female	3-4	109.52
1920	Female	3-4	123.46
1921	Female	3-4	112.25
1922	Female	3-4	125.39
1923	Female	3-4	119.64
1924	Female	3-4	106.91
1925	Female	3-4	128.26
1926	Female	3-4	118.63
1927	Female	3-4	123.01
1928	Female	3-4	121.52
1929	Female	3-4	122.82
1930	Female	3-4	120.41
1931	Female	3-4	105.19
1932	Female	3-4	126.55
1933	Female	3-4	116.72
1934	Female	3-4	124.44
1935	Female	3-4	116.2
1936	Female	3-4	111.78
1937	Female	3-4	126.14
1938	Female	3-4	118.4
1939	Female	3-4	120.7
1940	Female	3-4	116.46
1941	Female	3-4	125.6
1942	Female	3-4	126.14
1943	Female	3-4	113.08
1944	Female	3-4	114.75
1945	Female	3-4	108.61
1946	Female	3-4	117.45
1947	Female	3-4	121.02
1948	Female	3-4	114.75
1949	Female	3-4	115.99
1950	Female	3-4	122.9
1951	Female	3-4	125.36
1952	Female	3-4	122.38
1953	Female	3-4	118.83
1954	Female	3-4	119.46
1955	Female	3-4	120.6
1956	Female	3-4	123.15
1957	Female	3-4	119.57
1958	Female	3-4	117.15
1959	Female	3-4	116.86
1960	Female	3-4	118.29
1961	Female	3-4	119.84
1962	Female	3-4	128.63
1963	Female	3-4	120.24
1964	Female	3-4	113.8
1965	Female	3-4	115.75
1966	Female	3-4	130.6
1967	Female	3-4	114.98
1968	Female	3-4	115.07
1969	Female	3-4	120.76
1970	Female	3-4	123.26
1971	Female	3-4	118.61
1972	Female	3-4	119.75
1973	Female	3-4	110.73
1974	Female	3-4	122.68
1975	Female	3-4	121.73
1976	Female	3-4	116.06
1977	Female	3-4	121.78
1978	Female	3-4	123.98
1979	Female	3-4	114.51
1980	Female	3-4	116.81
1981	Female	3-4	116.43
1982	Female	3-4	113.27
1983	Female	3-4	121.27
1984	Female	3-4	123.83
1985	Female	3-4	116.63
1986	Female	3-4	121.46
1987	Female	3-4	113.14
1988	Female	3-4	111.09
1989	Female	3-4	111.36
1990	Female	3-4	119.7
1991	Female	3-4	116.65
1992	Female	3-4	118.26
1993	Female	3-4	117.27
1994	Female	3-4	124.48
1995	Female	3-4	117.8
1996	Female	3-4	123.41
1997	Female	3-4	122.08
1998	Female	3-4	114.01
1999	Female	3-4	114.86
[truncated: 22,973 more rows]

## Sheet: Offspring & Adult female data
Sample ID	Hunting District code	Julian date	Year	Sex	Body - Eviscerated weight in kg (8-10 months)	Mandible - Anterior section length in mm (8-10 months; b in Fig. 1)	Mandible - Posterior section length in mm (8-10 months; c in Fig. 1)	Female eviscerated body weight in kg (≥ 2 years)
1	#6	24	2015	Female	12.7	70.5	55.5	20.34
2	#4	1	2014	Female	11.5	64.19	51.09	16.26
3	#4	60	2014	Female	12.2	64.45	72.7	16.26
4	#6	5	2015	Male	10	66.04	50.68	18.5
5	#4	25	2014	Female	13.7	67.14	63.14	16.26
6	#4	9	2014	Male	11.7	63.11	62.3	16.26
7	#4	50	2014	Female	10.4	64.18	70.83	16.26
8	#4	43	2015	Female	11.3	67.06	65.92	17
9	#4	62	2013	Male	8.5	54.23	69.99	15.98
10	#4	47	2014	Male	12.3	56.79	73.29	16.26
11	#4	3	2013	Male	9.75	64.5	47.51	16.11
12	#4	3	2013	Female	11.4	58.61	44.36	16.11
13	#4	12	2013	Female	11.5	63.96	46.31	16.11
14	#4	10	2013	Male	13	68.6	58.86	19.04
15	#5	54	2014	Female	12.6	66.38	64.48	17.98
16	#5	6	2014	Male	13.5	67.54	56.11	17.98
17	#5	7	2013	Female	9.2	67.12	52.12	17.74
18	#5	45	2013	Female	8.1	66.06	63.3	16.98
19	#5	45	2013	Male	11.9	66.01	63.96	17.74
20	#5	31	2013	Female	13.2	67.03	65.58	18.1
21	#5	12	2013	Male	10.4	66.43	59.45	17.74
22	#5	61	2014	Male	11.6	68.18	68.78	17.98
23	#5	59	2013	Male	14.9	67.85	69.43	17.74
24	#6	50	2014	Male	10.2	64.88	64.13	18.2
25	#6	25	2014	Female	11.9	57.98	66	17.67
26	#4	5	2015	Male	6.7	NA	NA	19
27	#6	54	2014	Female	12.2	65.59	67.42	18.2
28	#6	4	2015	Male	9.7	70.2	62.81	18.5
29	#6	38	2013	Female	11.5	62.54	63.44	15.19
30	#6	70	2013	Female	12.4	64.16	66.08	18.1
31	#6	43	2015	Female	13.9	NA	NA	18.5
32	#6	73	2013	Female	14.3	65.21	67.3	18.23
33	#6	12	2013	Female	13.7	63.89	56.26	17.85
34	#6	47	2013	Female	12.2	65.39	67.73	18.1
35	#6	22	2014	Male	12.3	68.18	58.92	18.2
36	#6	26	2014	Female	9.6	64.82	56.98	17.34
37	#6	64	2015	Female	10.9	67.95	69.29	18.5
38	#6	51	2013	Female	11	66.54	66.93	18.1
39	#6	5	2013	Female	13.7	58.14	54.65	16.34
40	#6	26	2013	Female	11.8	65.01	63.24	18.1
41	#6	69	2013	Female	12.1	68.54	69.63	19
42	#6	50	2015	Male	13.9	54.17	65.22	16.15
43	#6	65	2013	Female	14.9	68.12	71.02	18.1
44	#6	66	2013	Female	13.3	67.85	71.76	18.23
45	#6	73	2013	Male	13.8	69.01	69.13	18.1
46	#6	68	2015	Male	13.4	65.71	64.62	17.32
47	#6	20	2014	Female	15.1	70.09	56.38	18.2
48	#6	61	2014	Female	11.7	66.59	69.92	18.2
49	#6	4	2015	Male	13.6	71.24	62.02	18.5
50	#6	74	2014	Female	15.5	66.43	73.8	18.2
51	#6	23	2014	Female	11.1	64.28	58.84	17.2
52	#6	69	2014	Female	10.8	67.68	72.08	18.2
53	#6	67	2014	Female	12.4	57.41	63.55	15.85
54	#6	44	2014	Female	14.4	66.52	69.47	18.2
55	#7	34	2014	Female	9.6	66.12	67.86	17.41
56	#7	57	2014	Male	12.8	67.87	66.85	17.41
57	#7	3	2013	Male	13.2	66.54	56.91	17.11
58	#7	43	2014	Female	10.1	67.32	66.55	17.41
59	#7	51	2014	Female	10.7	67.34	65.65	17.41
60	#7	4	2015	Female	9.9	68.81	48.85	18.33
61	#7	68	2013	Male	11.8	67.87	66.67	17.43
62	#7	5	2013	Male	13.8	66.87	58.11	17.43
63	#7	6	2013	Female	12.2	66.44	54.32	17.43
64	#7	62	2014	Female	16.5	66.53	71.47	17.41
65	#7	72	2013	Male	12.1	67.19	66.79	18.43
66	#7	72	2014	Male	11.9	67.81	68.67	17.41
67	#18	54	2014	Female	16.1	68.14	70.75	19.97
68	#18	37	2013	Male	13.4	67.5	65.99	18.48
69	#18	18	2014	Male	11.9	66.83	59.15	18.68
70	#18	50	2015	Female	12.9	64.99	67.57	17.95
71	#18	72	2013	Female	13.3	65.78	70.16	19.48
72	#18	35	2013	Male	15.4	65.39	68.5	18.28
73	#18	53	2014	Male	16.1	67.37	67.17	18.68
74	#18	2	2013	Female	13.1	61.59	54.42	16.21
75	#18	36	2014	Male	12	65.21	67.18	18.68
76	#18	53	2014	Female	12.9	68.32	67.33	18.68
77	#18	61	2013	Male	12.9	68.81	68.2	18.48
78	#18	63	2013	Female	11.4	64.25	66.09	17.12
79	#18	63	2015	Female	9.9	64.6	58.05	17.89
80	#18	16	2014	Male	14.2	67.92	59.03	18.68
81	#18	56	2014	Male	15.2	68.72	67.29	18.68
82	#18	2	2014	Female	16.9	65.72	58.03	17.49
83	#18	52	2013	Female	13.3	66.9	66.81	18.48
84	#18	50	2015	Female	13.4	63.27	67.11	16.35
85	#18	40	2013	Female	12.7	69.6	67.79	19.13
86	#18	69	2013	Female	13.5	68.75	73.1	18.28
87	#18	27	2013	Male	10.6	63.72	58.89	16.34
88	#2	13	2013	Female	8.9	61.83	56.45	16.05
89	#2	72	2013	Female	10.7	63.7	70.71	17.23
90	#2	16	2014	Male	11.2	67.88	62.36	18.21
91	#2	50	2013	Female	12.8	63.93	64.38	16.8
92	#2	67	2014	Male	13.1	67.81	69.71	18.21
93	#2	21	2013	Female	8.9	68.14	61.79	17.65
94	#2	66	2013	Male	8.8	65.71	65.29	17.65
95	#2	23	2013	Female	8.2	66.6	60.62	18
96	#2	67	2014	Male	14.2	67.34	68.98	18.21
97	#2	68	2014	Male	12.2	67.73	66.13	18.21
98	#2	65	2014	Female	12.6	66.47	72.2	18.21
99	#2	61	2014	Female	15.4	65.12	68.53	18.21
100	#2	53	2014	Male	14.8	67.31	68.42	18.21
101	#2	2	2013	Female	12.7	66.18	47.27	17.65
102	#2	69	2013	Female	11	65.07	64.3	19.37
103	#2	17	2015	Male	11.1	69.04	56.87	18.88
104	#2	72	2014	Male	10.7	66.89	72.06	18.21
105	#2	19	2014	Male	12.2	67.42	63.64	18.21
106	#2	29	2014	Female	11.9	66.14	61.37	18.21
107	#2	42	2015	Female	13.6	69.72	63.36	18.88
108	#2	33	2014	Female	11.6	65.18	62.69	18.21
109	#2	46	2015	Female	13.9	66.99	62.01	18.88
110	#2	11	2014	Female	12.2	64.12	56.09	17.44
111	#2	11	2014	Male	12.6	66.71	60.13	18.21
112	#2	52	2015	Male	12.6	71.13	66.23	18.88
113	#2	55	2014	Female	14.1	68.17	70.3	18.21
114	#2	64	2014	Female	10	64.23	72.59	17.21
115	#2	14	2015	Female	13.2	64.99	55.39	17.88
116	#2	12	2014	Female	9.9	67.43	59.99	18.21
117	#2	15	2014	Male	11.4	66.58	58.28	18.21
118	#2	39	2014	Female	10.9	66.54	63.28	18.21
119	#2	28	2015	Male	14	71.43	65.29	18.88
120	#2	8	2014	Male	13.8	65	58.89	18.21
121	#2	22	2014	Male	17.2	68.79	64.89	18.21
122	#2	46	2014	Male	10.3	66.48	66.35	18.21
123	#3	73	2013	Male	14	66.15	66.97	19.15
124	#3	69	2013	Male	9.2	67.45	66	19.44
125	#3	57	2014	Female	13.3	66.33	67.98	19.65
126	#3	61	2013	Male	14.2	67.89	65.98	19.58
127	#3	63	2013	Male	12.1	67.43	67.13	19.58
128	#3	68	2014	Male	12.3	67.17	66.28	19.65
129	#3	46	2014	Male	10	67.58	66.24	19.65
130	#3	72	2013	Male	10.9	67.64	69.12	19.58
131	#3	72	2013	Female	13.2	67.38	70.33	19.15
132	#3	58	2014	Male	13	66.12	70.59	19.65
133	#3	63	2013	Male	12.6	66.51	68.7	19.15
134	#3	68	2013	Female	12.9	66.32	69.5	19.15
135	#3	47	2013	Male	14.3	66.21	66.34	19.15
136	#3	61	2014	Male	14.5	66.69	70.23	19.65
137	#3	44	2014	Female	13	67.09	66.99	19.65
138	#3	39	2014	Male	10.2	67.87	67.11	19.65
139	#3	65	2014	Male	14.3	67.45	69.3	19.65
140	#3	12	2014	Female	13.8	66.43	57.13	19.65
141	#3	65	2014	Male	13.2	67.53	71.47	19.65
142	#3	33	2014	Male	11.3	67.52	63.24	19.65
143	#3	69	2013	Female	7.6	66.89	66.96	19.44
144	#3	49	2013	Male	14.6	66.78	66.27	19.44
145	#3	23	2014	Female	15	66.83	61.63	19.65
146	#3	47	2014	Female	11.7	67.78	64.77	19.65
147	#4	40	2014	Male	10.3	57.81	60.89	16.26
148	#7	39	2014	Female	15.1	68.12	63.75	19.41
149	#2	68	2014	Male	13.2	66.29	69.63	18.21
150	#2	11	2014	Female	12.6	66.46	56.82	18.21
151	#2	71	2015	Female	11.3	68.97	68	18.88
152	#2	2	2014	Male	12.5	68.75	51.81	18.21
153	#2	25	2014	Male	12.4	65.28	64.33	18.21
154	#2	26	2013	Female	7.7	68.53	60.04	18.29
155	#3	71	2014	Male	11.6	67.3	66.33	19.65
156	#12	65	2014	Female	12.8	66.74	67.68	18.9
157	#12	25	2014	Male	8.3	67.23	58.64	18.9
158	#9	22	2014	Male	15.8	70.01	65.75	18.78
159	#9	9	2013	Female	11.5	66.32	52.33	18.28
160	#21	65	2013	Female	12.8	66.35	67.56	18.43
161	#10	37	2013	Male	10.8	66.26	68.28	18.6
162	#10	74	2015	Female	14.2	68.45	67.22	17.69
163	#10	19	2013	Female	10.7	67.88	55.36	18.12
164	#1	24	2013	Female	11.2	67.43	64.99	17.96
165	#11	68	2013	Female	14.7	68.76	71.11	18.52
166	#11	25	2014	Female	12.1	66.23	62.31	18.68
167	#11	20	2013	Female	10.1	66.58	56.28	18.52
168	#11	62	2013	Female	12.5	67.88	70.36	18.63
169	#14	62	2013	Female	13.1	67.42	71.64	17.24
170	#14	73	2013	Female	12.5	63.73	65.95	16.24
171	#14	73	2013	Male	11.7	65.28	70.33	17.24
172	#14	72	2013	Female	13.3	66.91	65.71	17.49
173	#14	58	2013	Female	13.2	65.29	72.62	17.24
174	#14	27	2013	Male	12.4	63.52	59.86	17.24
175	#14	43	2015	Male	11.4	64.19	62.92	17.68
176	#14	73	2015	Male	11.2	68.13	57.21	17.68
177	#21	46	2014	Male	12.9	66.87	64.78	18.17
178	#21	70	2013	Male	12.7	64.96	64.86	18.43
179	#21	68	2013	Female	14.3	68.27	66.46	18.32
180	#21	69	2013	Female	13.6	63.75	72.3	17.11
181	#21	71	2014	Male	12.9	66.33	59.86	18.17
182	#21	39	2015	Female	13.2	67.94	66.81	17.1
183	#18	26	2014	Female	11.1	65.91	63.41	18.68
184	#17	68	2013	Male	10.9	66.85	71.52	16.11
185	#17	74	2014	Male	10.6	65.48	69.81	17.06
186	#17	65	2013	Male	11.6	65.45	67.69	16.02
187	#17	72	2014	Female	10.8	65.82	63.82	17.06
188	#17	43	2014	Male	9.1	65.14	62.65	17.06
189	#12	51	2014	Female	15	66.32	71.7	18.9
190	#3	47	2014	Female	10	67.47	65.55	19.65
191	#3	57	2014	Male	13.3	67.43	68.55	19.65
192	#3	47	2014	Male	10.6	67.91	64.8	19.65
193	#3	71	2015	Female	13	68.15	65.11	19.6
194	#3	40	2015	Male	13.9	67.86	67.02	19.6
195	#3	65	2013	Female	14.2	67.43	69.99	19.44
196	#3	61	2014	Female	15.6	67.97	66.24	19.65
197	#2	70	2013	Male	9.3	66.34	67.38	17.58
198	#2	14	2013	Female	10.1	66.58	50.27	17.86
199	#2	72	2013	Female	12.7	67.88	70.36	17.9
200	#2	11	2014	Male	14.1	67.33	61.46	18.21
201	#2	64	2014	Female	12.6	65.72	67.72	17.64
202	#2	68	2013	Male	12.5	67.42	69.43	17.92
203	#2	50	2015	Female	14.9	68.38	66.42	18.88
204	#2	44	2014	Female	11.4	65.32	65.37	18.21
205	#2	69	2014	Female	12.4	67.44	69.43	18.21
206	#2	66	2013	Male	11.7	63.73	65.95	17.05
207	#9	40	2013	Female	10.7	63.74	58.17	17.52
208	#9	52	2013	Male	13	63.52	65.86	17.12
209	#9	41	2013	Female	16.1	66.91	64.71	18.42
210	#9	39	2015	Female	12.4	71.21	68.13	20
211	#9	3	2013	Female	11.7	65.28	51.36	18.28
212	#1	55	2014	Female	12.7	66.92	72.11	18.11
213	#1	62	2013	Female	14	64.96	71.86	17.63
214	#1	47	2013	Female	12.9	67.42	70.64	17.63
215	#1	59	2013	Female	13	63.73	65.95	16.57
216	#1	72	2014	Female	11.4	66.59	71.84	18.11
217	#1	70	2015	Female	10.9	70.81	70.7	18.25
218	#1	51	2013	Female	13	65.28	70.33	17.63
219	#1	73	2013	Male	12.3	68.27	70.46	17.94
220	#1	34	2013	Female	12.6	66.91	63.71	17.7
221	#19	62	2014	Male	11.1	66.65	67.33	18.32
222	#19	5	2015	Female	13.1	65.97	52.91	18.76
223	#19	39	2014	Female	10.3	67.56	66.52	18.32
224	#19	12	2013	Male	13.4	66.34	59.38	18.11
225	#8	7	2013	Male	13.3	66.58	56.28	19.28
226	#10	72	2014	Male	16.4	66.11	67.92	18.66
227	#10	65	2013	Male	13.4	67.76	70.68	18.6
228	#10	19	2013	Male	10.2	67.54	57.91	18.6
229	#10	52	2013	Male	12.4	65.87	67.31	18.6
230	#14	47	2013	Male	12.1	65.28	69.33	17.49
231	#14	35	2013	Male	14.4	66.91	62.71	17.49
232	#11	47	2013	Male	11.5	63.74	66.17	15.89
233	#11	58	2013	Female	16.7	70.19	78.99	18.63
234	#11	35	2013	Female	18.7	64.96	69.86	18.52
235	#21	65	2014	Female	14.5	66.29	67.09	18.17
236	#21	65	2014	Female	13.4	67.83	70.06	18.17
237	#21	3	2013	Female	9.5	68.27	41.46	18.43
238	#21	67	2014	Male	13.4	67.53	65.23	18.17
239	#21	58	2013	Male	12.5	63.75	72.3	16.16
240	#21	73	2013	Male	12.5	67.33	64.46	18.32
241	#21	43	2014	Male	14.4	66.94	65.38	18.17
242	#13	40	2013	Male	16.3	67.88	67.36	17.47
243	#13	50	2014	Male	12.2	63.82	61.53	16.71
244	#13	65	2014	Female	11.4	68.21	68.62	17.78
245	#15	61	2013	Male	14.9	66.17	66.47	18.03
246	#20	18	2015	Male	11.6	67.98	54.48	18.25
247	#10	31	2013	Female	9.7	67.23	68.64	18.12
248	#10	1	2014	Male	11.2	66.12	57.53	18.66
249	#10	41	2014	Female	13.8	66.21	66.45	18.66
250	#10	39	2014	Male	11.8	66.25	64.18	18.66
251	#10	30	2013	Female	12.8	67.42	63.67	18.6
252	#10	52	2013	Male	14.4	66.31	66.31	18.6
253	#4	72	2013	Female	13.7	64.01	67.3	16.36
254	#5	27	2014	Male	14.4	67.18	60.87	18.98
255	#5	47	2015	Female	12.9	69.81	66.75	18.75
256	#22	32	2014	Female	10.3	66.31	61.47	17.51
257	#22	68	2014	Female	12.2	67.49	61.3	17.51
258	#22	61	2014	Female	11.6	66.58	59.09	17.51
259	#22	59	2015	Male	12.2	68.41	72.96	18
260	#7	57	2014	Female	10.8	67.32	66.12	17.41
261	#18	63	2013	Male	9.3	63.73	65.95	16.28
262	#8	68	2013	Female	14.5	68.23	80.89	18.01
263	#8	72	2013	Male	13.9	68.61	70.46	19.28
264	#8	68	2013	Female	15.6	68.32	70.84	19.28
265	#8	41	2013	Female	14.5	63.74	66.17	16.11
266	#8	71	2014	Female	11.8	68.24	73.28	19.42
267	#8	26	2013	Female	14.6	65.28	65.33	19.01
268	#15	41	2013	Female	13.7	69.75	69.44	18.93
269	#15	4	2015	Male	12.7	68.12	62.04	18.58
270	#15	63	2015	Male	16.2	68.27	71.99	18.58
271	#15	26	2014	Male	13.3	64.25	61.9	17.45
272	#15	20	2014	Female	11.2	63.64	57.38	17.09
273	#15	30	2014	Male	13.5	64.91	60.65	17.55
274	#15	52	2013	Female	12.9	65.43	70.06	18.93
275	#15	60	2014	Male	13.6	70.16	74.22	18.38
276	#15	51	2013	Male	10.4	68.74	74.41	18.17
277	#15	27	2013	Female	15.3	65.83	66.29	18.03
278	#15	25	2014	Male	11.9	63.94	55.4	16
279	#15	41	2013	Female	17.5	69.14	71.43	19.34
280	#15	62	2013	Female	15.7	66.34	67.38	18.93
281	#16	26	2014	Female	11.7	66.78	60.4	17.82
282	#16	19	2013	Female	11.8	66.58	56.57	18.29
283	#16	65	2013	Male	9.5	64.21	65.63	17.12
284	#16	72	2013	Female	16.5	70.19	78.96	18.35
285	#16	73	2014	Female	11.9	65.01	68.15	17.82
286	#16	28	2013	Female	11.2	66.53	61.36	18.15
287	#16	72	2013	Female	13.8	64.98	68.3	18.29
288	#9	73	2013	Male	13	64.96	71.86	18.28
289	#9	48	2013	Female	10.3	63.74	66.17	15.48
290	#9	44	2013	Male	12.3	65.19	68.93	18.12
291	#9	65	2014	Male	12.9	68.76	68.77	18.78
292	#9	61	2014	Female	15.6	67.43	73.33	18.78
293	#9	70	2013	Female	15.9	68.27	70.46	18.42
294	#9	67	2014	Male	11.2	66.71	71.1	18.78
295	#9	16	2014	Male	14.6	68.16	62.81	18.78
296	#9	69	2013	Female	14	63.75	67.3	17.15
297	#9	69	2013	Male	15.8	67.33	69.46	18.28
298	#9	64	2014	Female	13.2	66.92	71.1	18.78
299	#9	55	2014	Female	16.1	69.11	70.46	18.78
300	#9	57	2014	Female	12.4	67.92	69.95	18.78
301	#9	30	2013	Male	10.5	66.91	59.71	18.42
302	#9	69	2013	Female	14.7	65.91	69.46	18.42
303	#9	69	2013	Male	15.4	67.43	69.99	18.42
304	#9	19	2014	Male	10.9	67.43	57.55	18.78
305	#9	34	2014	Male	15.3	67.22	67.32	18.78
306	#9	40	2014	Female	11	66.13	64.85	18.78
307	#9	46	2014	Male	11.6	67.08	65.55	18.78
308	#9	26	2014	Female	11	66.98	62.23	18.78
309	#1	3	2013	Male	8.9	64.96	61.86	17.63
310	#1	27	2013	Female	11.2	68.27	65.46	17.92
311	#1	69	2013	Female	13.5	63.75	67.3	17.23
312	#1	62	2013	Male	14.6	67.33	69.46	17.63
313	#1	72	2014	Male	14.4	67.38	68.69	18.11
314	#1	41	2013	Female	12.7	63.74	66.17	15.68
315	#1	72	2013	Female	12.7	65.91	69.46	17.63
316	#1	56	2013	Female	12.8	63.52	65.86	16.52
317	#1	37	2014	Female	12.7	67.88	67.28	18.11
318	#1	36	2014	Male	12.9	66.93	63.43	18.11
319	#1	72	2013	Female	12.1	67.43	69.99	17.92
320	#1	61	2013	Female	12.8	66.34	67.38	17.8
321	#1	61	2013	Female	12.7	66.58	70.31	17.52
322	#1	40	2013	Female	13	64.96	69.86	17.6
323	#1	32	2014	Female	15	66.54	64.85	18.11
324	#1	26	2014	Male	13.6	66.41	61.57	18.11
325	#1	68	2014	Female	12.9	68.02	66.21	18.11
326	#1	62	2013	Male	11.4	67.88	70.36	17.92
327	#1	30	2013	Female	12.9	63.75	62.3	16.28
328	#1	47	2013	Female	12.7	68.27	69.46	17.96
329	#1	72	2013	Male	15	66.25	70.07	17.75
330	#1	40	2014	Female	12.5	66.44	71.82	18.11
331	#1	64	2014	Male	13.8	67.51	68.13	18.11
332	#1	61	2013	Male	14.1	67.46	71.8	17.96
333	#1	51	2013	Male	12.9	63.75	67.3	17.15
334	#1	47	2014	Female	11.6	66.32	71.13	18.11
335	#1	68	2014	Female	11.4	67.48	66.44	18.11
336	#1	32	2014	Female	13	66.12	67.49	18.11
337	#1	32	2014	Male	16.7	67.89	67.58	18.11
338	#1	72	2013	Female	12.2	64.79	66.15	17.63
339	#1	21	2013	Female	13	67.33	64.46	17.63
340	#1	21	2013	Male	13	65.91	63.46	17.63
341	#1	59	2013	Male	12.9	67.33	69.46	17.78
342	#1	59	2013	Male	13	65.91	69.46	17.7
343	#1	73	2013	Male	14.4	66.78	66.28	17.63
344	#1	67	2014	Female	12	69.12	68.89	18.11
345	#1	73	2015	Male	12.4	69.22	72.42	18.25
346	#1	67	2014	Female	12.2	66.55	67.01	18.11
347	#1	72	2014	Male	15.3	67.98	65.52	18.11
348	#1	69	2014	Female	13.2	67.08	68.18	18.11
349	#1	69	2014	Female	12.6	67.37	66.18	18.11
350	#1	61	2013	Female	12.2	67.55	67.66	17.8
351	#1	67	2014	Female	14.1	66.25	67.49	18.11
352	#1	58	2013	Male	14.3	67.43	69.99	17.83
353	#1	59	2013	Female	12.2	66.34	67.38	17.63
354	#1	39	2014	Female	13.4	67.96	68.45	18.11
355	#1	61	2013	Male	14.4	69.12	70.4	18.79
356	#1	42	2015	Female	12.4	66.1	71.9	18.25
357	#1	59	2015	Female	10.6	69.17	71.95	18.25
358	#1	54	2014	Female	11.1	67.03	69.02	18.11
359	#1	72	2013	Female	12.8	66.75	66.69	17.86
360	#1	5	2013	Male	11.4	67.43	59.99	17.63
361	#1	47	2013	Male	13	66.58	65.28	17.63
362	#1	61	2013	Female	13.2	67.16	68.6	17.63
363	#1	12	2013	Female	13.9	66.34	57.38	17.63
364	#1	48	2014	Male	12.7	69.24	63.37	18.11
365	#1	48	2014	Female	13.9	68.26	64.2	18.11
366	#1	50	2014	Male	14.1	67.43	67.55	18.11
367	#1	55	2013	Female	14.1	67.88	70.36	17.8
368	#1	14	2015	Female	11.6	67.95	55.15	18.25
369	#12	57	2015	Male	12	67.05	64.34	18.9
370	#12	55	2014	Female	12.9	65.98	71.17	18.9
371	#12	72	2014	Female	15	66.92	67.28	18.9
372	#12	39	2014	Female	13.4	66.78	64.56	18.9
373	#12	74	2014	Male	12.2	66.8	67.07	18.9
374	#12	23	2014	Female	12.5	66.12	62.31	18.9
375	#12	23	2014	Female	12.6	66.13	57.84	18.9
376	#12	56	2015	Female	13.2	67.14	71.33	18.9
377	#12	59	2015	Female	17	68.67	66.04	18.9
378	#12	33	2014	Male	11.9	66.51	66.16	18.9
379	#2	25	2014	Female	14.9	66.91	60.71	18.21
380	#2	68	2013	Male	12.5	67.42	71.64	18.98
381	#2	25	2014	Female	11.8	63.74	62.17	16.21
382	#2	55	2014	Male	14.8	68.33	67.6	18.21
383	#2	51	2014	Male	13.2	68.03	68.04	18.21
384	#2	72	2013	Female	13.2	63.73	65.95	17.22
385	#2	55	2014	Male	13.2	67.24	66.78	18.21
386	#2	58	2014	Female	11.6	66.47	67.28	18.21
387	#2	65	2014	Female	11.9	66.92	72.13	18.21
388	#2	66	2013	Female	12.7	65.28	70.33	17.22
389	#2	74	2014	Male	15.2	69.79	70.89	18.21
390	#2	72	2013	Female	12.8	66.91	65.71	18
391	#2	49	2013	Female	12.7	63.74	66.17	17.65
392	#2	30	2013	Male	10.6	63.52	59.86	16.5
393	#2	5	2013	Female	10.8	64.96	55.86	16.8
394	#2	40	2013	Male	14.2	68.27	67.46	17.92
395	#2	68	2013	Male	12.5	63.75	67.3	17.65
396	#2	30	2013	Female	9.7	67.33	60.36	17.65
397	#2	10	2013	Female	11.2	65.91	53.46	17.22
398	#2	61	2015	Female	13.7	69.23	63.12	18.88
399	#2	68	2013	Male	12.8	67.43	69.99	17.84
400	#2	26	2014	Female	11.4	64.96	66.86	16.21
401	#2	26	2014	Male	13.7	68.27	64.46	18.21
402	#2	3	2013	Female	16.7	66.34	58.38	17.65
403	#2	7	2013	Female	14	66.58	50.28	17.23
404	#2	39	2014	Female	11.7	66.43	64.99	18.21
405	#2	74	2014	Female	12.9	67.75	69.47	18.21
406	#2	59	2015	Female	16.1	68.15	69.93	18.88
407	#2	19	2015	Male	12	71.15	63.89	18.88
408	#2	31	2015	Female	15.8	65.19	63.83	18.88
409	#2	73	2013	Female	11.7	67.88	70.36	17.84
410	#2	72	2014	Female	14.9	67.85	71.27	18.21
411	#17	34	2014	Male	10	61.03	61.66	17.06
412	#17	37	2013	Female	9.7	68.87	60.85	18.87
413	#17	71	2014	Male	10.1	63.27	65.7	17.06
414	#17	27	2014	Female	16.5	68.79	71.82	17.06
415	#17	34	2014	Female	11	67.61	60.53	17.06
416	#17	56	2015	Male	10.3	66.25	72.23	18.5
417	#17	34	2013	Male	8.8	60.28	62.7	16.11
418	#17	27	2014	Female	18.1	68.73	70.53	17.06
419	#17	71	2015	Male	16.6	66.31	74.38	18.5
420	#17	64	2014	Female	16.1	69.98	70.57	18.75
421	#17	18	2015	Female	11.5	64.25	54.89	17.5
422	#17	33	2014	Male	13.6	66.97	63.31	17.06
423	#17	37	2013	Male	11.6	59.36	61.94	16.02
424	#17	70	2015	Female	13.6	65.49	74.32	18.5
425	#17	53	2014	Female	10.3	62.01	64.33	16.89
426	#17	49	2015	Female	12	66.87	67.42	18.5
427	#20	47	2013	Female	12.2	66.17	59.7	17.52
428	#20	49	2013	Male	12.8	67.58	64.57	17.52
429	#20	40	2014	Male	11.2	65.41	64.24	17
430	#20	33	2013	Female	12.1	66.32	63.82	17.52
431	#20	33	2013	Male	10.6	66.87	61.4	17.52
432	#18	64	2014	Male	10.4	67.34	66.65	18.68
433	#18	71	2014	Male	11.9	67.49	68.26	18.68
434	#18	24	2015	Male	12.7	67.5	66.42	18.89
435	#18	74	2014	Female	14.4	68.6	68.27	18.68
436	#18	70	2015	Female	14.7	64.74	73.45	17.44
437	#18	74	2014	Male	11.1	65.57	73.51	18.68
438	#18	40	2014	Female	10.4	64.01	62.33	16.76
439	#18	72	2014	Female	10.4	65.63	67.61	18.68
440	#18	11	2014	Male	12.8	65.23	59.31	18.68
441	#18	16	2014	Female	17.4	70.02	58.45	19.64
442	#6	63	2015	Male	13.6	64.16	69.43	17.92
443	#6	61	2014	Male	15.3	66.27	68.97	18.2
444	#6	38	2013	Male	12.2	66.23	64.89	18.1
445	#6	1	2014	Female	13.6	68.21	45.94	18.2
446	#6	2	2014	Female	11.9	65.76	49.4	18.2
447	#7	69	2013	Male	11.5	63.75	67.3	17.43
448	#7	70	2013	Male	12.6	67.33	69.46	17.43
449	#7	67	2014	Female	12.6	67.33	66.19	17.41
450	#7	70	2013	Male	12.6	65.91	69.46	17.11
451	#4	63	2013	Female	8.2	65.69	66.01	16.36
452	#6	52	2015	Female	13.4	65.2	64.93	18.5
453	#3	61	2014	Female	11.5	68.17	71.01	19.65
454	#3	73	2013	Female	12.3	66.34	67.38	19.44
455	#3	17	2015	Female	13.2	69.62	57.65	19.6
456	#3	69	2014	Male	10.2	66.43	71.38	19.65
457	#3	53	2014	Male	10.1	66.79	66.2	19.65
458	#3	72	2014	Male	11.6	66.37	69.65	19.65
459	#3	32	2015	Female	13.9	73.12	69.25	19.6
460	#3	67	2015	Female	13.6	65.46	67.61	19.6
461	#3	70	2015	Male	14.1	67.12	63.63	19.6
462	#13	61	2013	Male	9.9	65.91	69.46	17.47
463	#13	72	2013	Male	11.1	67.43	69.99	17.11
464	#13	71	2014	Female	13.5	67.41	68.59	17.78
465	#13	73	2013	Female	16.6	66.34	67.38	17.47
466	#13	6	2013	Female	12	65.91	53.46	17.89
467	#13	68	2014	Female	11.6	65.15	70.53	17.78
468	#13	61	2013	Female	11.8	66.58	66.28	17.11
469	#13	69	2014	Male	13.2	69.14	69.88	19
470	#13	62	2013	Male	12.6	67.88	70.36	18.95
471	#13	69	2013	Female	11	67.42	71.64	17.11
472	#13	71	2015	Male	15.6	66.54	66.71	19.64
473	#5	15	2014	Male	11.2	66.62	58.85	17.98
474	#5	74	2014	Male	14	66.61	67.24	17.98
475	#5	54	2014	Male	11.8	66.25	64.99	17.98
476	#5	74	2014	Female	13.8	66.95	70.61	17.98
477	#5	48	2014	Female	12.1	66.87	65.08	17.98
478	#5	25	2015	Male	13.8	67.86	55.22	17
479	#5	44	2014	Male	13.1	66	63.89	17.98
480	#5	47	2014	Male	7.7	62.13	53.25	16.94
481	#5	49	2013	Female	12.7	63.52	64.86	16.98
482	#5	73	2013	Male	11.8	64.96	71.86	17.74
483	#5	58	2013	Female	10.4	68.27	70.46	16.98
484	#5	69	2013	Female	12.6	63.75	67.3	16.98
485	#5	2	2014	Female	13.9	64.25	51.98	17.19
486	#5	9	2013	Female	11.8	67.33	53.46	17.74
487	#5	27	2013	Male	9.5	65.91	63.46	17.74
488	#5	67	2014	Female	11.6	68.32	66.72	17.98
489	#5	3	2013	Female	9.5	67.43	53.99	18.98
490	#22	5	2013	Male	12.9	65.01	55.2	19.15
491	#22	21	2013	Female	11.1	63.99	59.15	17.37
492	#22	27	2013	Female	11.4	68.71	61.63	19.13
493	#22	69	2013	Male	13.4	68.14	72.19	17.37
494	#22	72	2014	Female	11.2	66.84	58.5	17.51
495	#22	34	2013	Male	13.3	65.75	64.79	17.88
496	#22	52	2013	Female	12.7	68.23	68.24	17.88
497	#22	43	2014	Female	10.9	65.19	60.58	17.51
498	#22	15	2015	Male	11.7	68.55	56.5	18
499	#22	45	2015	Male	13.2	65.57	66.8	18
500	#22	18	2014	Female	12.1	64.18	56.46	17.51
501	#22	74	2014	Male	12.4	68.15	65.53	20.08
502	#22	68	2014	Male	14.2	68.24	65.23	17.51
503	#22	38	2015	Male	12.4	69.28	60.31	18.45
504	#22	74	2015	Male	13.2	68.03	69.29	18
505	#22	73	2015	Female	13.2	71.36	71.96	19.42
506	#22	59	2015	Male	12.8	84.15	63.41	20.31
507	#22	39	2015	Male	16.1	71.37	65.64	19
508	#22	58	2014	Female	NA	NA	NA	19.05
509	#22	71	2015	Male	15.5	69.4	72.58	18
510	#22	63	2013	Female	13.3	71.99	77.69	19.66
511	#22	62	2014	Male	12.8	66.74	61.72	17.51
512	#22	30	2013	Male	12.1	63.97	58.49	17.02
513	#22	67	2014	Female	12.6	68.94	69.17	17.51
514	#22	50	2014	Male	14	65.31	66.14	17.51
515	#22	54	2014	Female	13.9	65.97	67.97	17.51
516	#22	62	2013	Male	13.6	69.15	79.57	18.97
517	#22	68	2015	Female	13.8	71.92	72.04	18.5
518	#22	70	2015	Female	13.1	68.59	70.18	18
519	#22	27	2013	Male	11.2	65.49	61.32	17.37
520	#22	27	2014	Male	11.4	63.22	59.75	17.01
521	#22	44	2014	Male	13.1	66.05	66.62	17.51
522	#22	69	2014	Female	11	66.22	60.25	17.51
523	#22	67	2014	Female	12.8	68.18	67.08	19.5
524	#22	57	2014	Male	11.1	66.84	66.44	17.51
525	#22	69	2014	Female	13.4	67.45	70	17.51
526	#22	5	2014	Female	13.4	67.15	58.18	17.51
527	#22	44	2014	Male	14.7	67.94	69.23	17.51
528	#22	60	2015	Female	13.5	69.22	67.7	18
529	#22	54	2015	Female	13	68.96	67.5	18
530	#22	60	2014	Male	15.2	68.74	71.28	17.51
531	#22	54	2014	Male	13.2	68.66	71.56	17.51
532	#22	68	2014	Female	11.9	66.55	67.61	17.51
533	#12	59	2013	Female	10.7	66.91	65.71	18.26
534	#12	21	2013	Male	15.1	68.27	70.32	18.26
535	#12	68	2014	Male	12.7	66.33	67.16	18.9
536	#12	35	2013	Male	12.4	63.74	64.17	18.03
537	#12	65	2014	Female	11.7	67.54	67.22	18.9
538	#12	26	2013	Male	12.8	63.75	61.3	17.85
539	#12	57	2014	Female	13	66.92	65.79	18.9
540	#12	40	2014	Male	13.3	67.07	64.37	18.9
541	#12	2	2013	Female	12.3	67.33	53.46	18.26
542	#12	59	2015	Male	13.7	68.7	71.98	18.9
543	#12	43	2015	Male	12.6	70.55	68.95	19.9
544	#12	19	2013	Male	11.9	65.91	61.46	18.26
545	#12	10	2013	Male	12.9	67.43	59.99	18.38
546	#12	3	2015	Male	12.9	65.98	53.14	18.9
547	#12	45	2013	Male	15.5	63.52	64.86	16.55
548	#12	46	2015	Female	10.3	66.19	67.4	18.9
549	#12	14	2013	Male	12.4	66.34	59.38	18.26
550	#12	67	2014	Female	11.9	67.65	69	18.9
551	#12	61	2013	Female	12.7	67.33	69.46	18.03
552	#12	47	2013	Male	14.3	64.96	70.86	18.03
553	#12	61	2013	Female	14	65.91	69.46	19.03
554	#12	72	2013	Female	12.7	67.43	69.99	18.03
555	#12	71	2014	Male	15.2	66.73	75.66	18.9
556	#12	6	2013	Female	11.5	66.58	50.28	18.03
557	#12	74	2014	Female	11	67.68	66.3	18.9
558	#12	64	2014	Female	12.4	66.23	65.88	18.9
559	#12	63	2013	Female	14.7	66.34	67.38	18.38
560	#12	17	2013	Female	10.3	67.88	60.36	19.26
561	#12	61	2013	Female	12.8	66.58	66.28	18.38
562	#12	12	2013	Female	11.7	67.42	61.64	18.26
563	#12	12	2013	Male	12.6	63.73	57.95	15.88
564	#12	47	2015	Male	13.4	70.33	65.7	19.67
565	#12	22	2014	Female	11.8	66.78	63.98	18.9
566	#12	57	2014	Female	11.1	66.41	68.12	18.9
567	#12	45	2013	Male	16.6	68.27	69.46	18.26
568	#12	19	2014	Female	13.6	66.54	60.21	18.9
569	#12	69	2013	Male	11.8	67.88	70.36	18.26
570	#12	24	2013	Female	11.9	65.28	65.33	18.03
571	#12	53	2014	Male	14.4	66.88	69.29	18.9
572	#12	46	2014	Male	14.4	68.01	60.74	18.9
573	#12	69	2013	Male	8.9	67.42	67.14	18.03
574	#12	39	2014	Female	12.2	67.52	63.12	18.9
575	#12	54	2014	Female	9.8	66.13	67.53	18.9
576	#12	24	2014	Male	13.8	66.32	61.55	18.9
577	#12	71	2015	Male	14.1	68.44	70.32	18.9
578	#12	48	2013	Male	12.4	63.75	66.3	17.85
579	#12	73	2013	Female	13.7	63.73	65.95	16.88
580	#12	54	2014	Female	11.5	66.43	63.53	18.9
581	#12	74	2015	Female	12.1	68.83	70.22	18.9
582	#20	63	2013	Male	11.7	64.02	55	17.63
583	#20	41	2013	Male	11.6	64.13	56.52	17.63
584	#20	44	2014	Female	11.9	66.56	66.3	17
585	#20	28	2015	Female	13.1	68.62	62.24	18.25
586	#20	40	2014	Female	10	66.52	65.17	17
587	#20	25	2014	Female	10.7	67.05	61.12	17
588	#20	60	2014	Male	10	66.54	60.22	19.59
589	#20	61	2014	Female	12	66.3	68.46	17
590	#20	19	2014	Male	13.1	66.32	54.99	17
591	#20	51	2014	Male	10.4	67.43	64.59	17
592	#20	49	2015	Male	11.4	67.88	62.42	18.25
593	#20	51	2014	Female	10.3	66.82	64.4	17
594	#20	26	2014	Female	10.2	64.47	56.19	17
595	#20	39	2014	Female	12	65.45	67.09	17
596	#20	46	2014	Male	8.9	66.97	64.97	17
597	#20	46	2014	Male	10.9	65.54	58.22	17
598	#20	52	2015	Female	12.2	69.08	64.88	18.25
599	#20	40	2014	Female	14.1	66.72	63.93	17
600	#20	74	2015	Male	12.4	63.28	66.76	16.11
601	#20	2	2013	Female	11.9	66.14	52.51	17.63
602	#20	20	2013	Male	11.8	66.86	55.56	17.63
603	#20	42	2015	Female	12.7	68.1	68.97	18.25
604	#20	7	2013	Female	10.3	63.21	45.82	15.18
605	#20	39	2014	Male	11.3	67.81	67.84	17
606	#20	63	2013	Female	12.7	65.56	60.81	17.52
607	#20	47	2014	Female	14.5	66.21	87.97	17
608	#20	58	2013	Male	10.5	69.33	68.32	19.15
609	#20	33	2014	Female	10.2	66.02	59.06	17
610	#20	30	2014	Female	10.6	64.58	56.96	17
611	#20	17	2013	Male	12.7	65.98	58	18.91
612	#20	3	2013	Female	11.9	64.72	47.4	17.63
613	#20	47	2013	Female	10	66.43	70.85	17.52
614	#20	24	2013	Male	11.7	67.11	62.88	17.52
615	#20	55	2014	Female	10.6	64.33	64.7	17
616	#20	40	2014	Male	11.8	68.08	62.75	17
617	#20	62	2014	Male	13	64.38	70.83	17
618	#9	46	2015	Male	11.6	68.75	67.91	20
619	#9	50	2015	Female	10.4	62.34	71.85	16.88
620	#9	15	2015	Female	15.3	67.17	55.24	20
621	#9	50	2015	Male	12.7	68.38	71.97	20
622	#9	3	2015	Female	14.5	69.19	52.76	20
623	#9	49	2015	Female	9.1	63.02	66.97	16.22
624	#9	31	2015	Female	15.2	72.9	67.88	20.3
625	#9	63	2015	Female	15.3	73.06	67.66	20.14
626	#9	74	2015	Female	15.7	69.39	70.88	20
627	#9	11	2015	Female	12.3	68.6	54.73	20
628	#9	63	2015	Female	18.2	68.74	74.49	20
629	#9	38	2015	Female	14.6	69.6	64.94	20
630	#9	61	2015	Female	NA	NA	NA	20
631	#9	61	2014	Female	16.6	68.08	71.17	18.78
632	#9	46	2015	Male	14.6	69.09	69.04	20
633	#9	56	2015	Female	13.4	65.85	65.44	20
634	#9	46	2014	Male	11.6	66.11	66.34	18.78
635	#9	17	2015	Male	11.6	69.37	56.35	20
636	#9	43	2014	Female	11.7	67.37	66.41	18.78
637	#9	43	2015	Male	14.4	73.75	71.11	20.5
638	#9	25	2015	Female	12	64.97	56.73	17.11
639	#9	1	2014	Male	10.6	66.12	57.16	18.78
640	#9	44	2014	Male	12.4	67.65	67.67	18.78
641	#9	9	2014	Male	10.7	66.62	60.1	18.78
642	#9	29	2014	Female	11.4	67.15	63.77	18.78
643	#9	71	2015	Female	15.5	68.97	73.42	20
644	#9	18	2015	Female	14.5	69.87	62.44	20
645	#21	72	2014	Male	13	67.21	66.23	18.17
646	#21	53	2015	Male	16	68.13	69.38	17.1
647	#21	58	2014	Female	12.2	66.32	68.55	18.17
648	#21	53	2014	Male	13.8	67.43	64.78	18.17
649	#21	74	2014	Male	10.1	67.29	54.13	18.17
650	#21	70	2015	Female	12.9	66.03	70.94	17.1
651	#21	72	2014	Male	11.5	67.76	66.25	18.17
652	#21	44	2013	Female	13.4	66.58	67.28	18
653	#21	54	2014	Male	9.9	67.15	68.83	18.17
654	#21	23	2013	Female	12.1	67.88	60.36	18.32
655	#21	68	2015	Female	14.3	65.01	61.37	17.1
656	#21	73	2015	Female	11.6	65.55	71.04	17.1
657	#21	41	2013	Female	12.6	67.42	70.64	18.32
658	#21	21	2013	Male	15.2	63.73	69.95	17.36
659	#21	71	2014	Female	15.9	66.61	68.68	18.17
660	#21	69	2013	Female	10.8	65.28	77.33	18.43
661	#21	74	2014	Male	13.4	66.87	66.96	18.17
662	#21	6	2013	Male	11.4	66.91	51.71	18.32
663	#21	66	2013	Female	11.2	63.74	63.17	16.94
664	#21	48	2014	Male	9.3	67.32	60.22	18.17
665	#21	68	2015	Female	12.4	66.37	63.9	17.1
666	#21	66	2013	Male	9.7	63.52	71.86	16.94
667	#21	72	2013	Female	12.7	64.96	71.86	18
668	#21	26	2013	Male	9.6	68.27	60.46	18.32
669	#21	43	2014	Female	12.6	68.08	59.14	18.17
670	#21	27	2013	Male	10.2	63.75	57.82	16.16
671	#21	46	2014	Female	11.2	67.41	65.57	18.17
672	#13	74	2014	Female	9.5	68.51	68.21	17.78
673	#13	55	2013	Male	12.5	67.42	71.64	17.89
674	#13	47	2013	Male	13.6	63.73	64.95	17.01
675	#13	25	2014	Female	9.3	66.13	61.59	17.78
676	#13	41	2013	Male	14.5	65.28	69.33	17.11
677	#13	63	2015	Female	11.9	68.01	67.68	18.64
678	#13	73	2013	Male	12.4	63.73	65.95	17.01
679	#13	49	2013	Male	10.4	66.91	64.71	17.11
680	#13	72	2014	Female	15.5	67.61	69.54	17.78
681	#13	64	2014	Male	12.5	68.34	69.55	19.78
682	#13	61	2014	Female	12.4	67.14	69.53	17.78
683	#13	72	2013	Male	11.6	65.28	70.33	17.47
684	#13	52	2013	Male	11	63.74	67.17	17.47
685	#13	65	2013	Male	8.9	66.91	65.71	17.11
686	#13	57	2014	Male	14.1	69.97	70.97	18.56
687	#13	68	2014	Female	13.2	67.82	70.94	17.78
688	#13	21	2013	Female	11.2	66.58	61.28	17.11
689	#13	74	2014	Male	10.2	70.71	66.61	17.78
690	#13	65	2013	Female	10.7	63.74	67.17	17.11
691	#13	48	2014	Female	9.6	67.48	69.95	17.78
692	#13	50	2014	Male	12.7	64.71	64.63	17.78
693	#13	49	2013	Female	15.3	67.33	68.46	17.89
694	#13	63	2013	Female	11.7	63.52	65.86	17.07
695	#15	6	2014	Male	13.5	64.95	55.55	16.33
696	#15	50	2014	Male	9.9	64.83	64.01	17.46
697	#15	41	2013	Male	14.6	67.91	67.34	18.17
698	#15	69	2013	Male	12.4	66.53	65.96	18.17
699	#15	41	2013	Male	13.2	64.55	66.99	18.17
700	#15	39	2014	Male	10.7	68.92	66.25	18.38
701	#15	59	2013	Female	11.9	64.13	68.54	16.31
702	#15	24	2013	Male	13.4	65.72	63.56	18.17
703	#15	52	2013	Female	13.8	65.43	64.84	18.93
704	#15	19	2014	Female	16.5	65.49	57.79	18.38
705	#15	45	2015	Male	17	64.12	66.17	18.58
706	#15	58	2014	Female	11.9	61.05	54.33	16.33
707	#15	25	2015	Male	14.1	67.81	63.08	18.58
708	#15	47	2013	Female	13.7	67.19	64.3	18.93
709	#15	40	2013	Female	12.1	68.71	67.73	18.93
710	#15	60	2014	Female	10.37	67.3	68.84	18.38
711	#15	47	2014	Male	13	66.53	66.62	18.18
712	#15	28	2013	Male	19.9	68.12	65.93	18.93
713	#15	53	2014	Female	10.9	65.94	70.27	18.38
714	#15	12	2013	Female	12.5	64.11	55.6	16.31
715	#15	58	2014	Female	13.2	64.58	69.37	17.63
716	#15	6	2013	Female	11.4	63.19	52.04	17
717	#15	19	2014	Female	14.2	64.97	57.54	16.38
718	#15	28	2015	Female	13.3	66.89	63.57	18.58
719	#15	39	2014	Male	10.7	64.86	65.81	17.94
720	#15	29	2014	Male	11.5	63.19	60.68	16.94
721	#15	61	2014	Female	15.8	69.22	70.9	18.38
722	#15	27	2014	Female	12.5	65.58	65.26	18.38
723	#15	71	2014	Female	11.7	66.12	64.1	18.38
724	#15	53	2014	Male	14.8	67.31	69.26	18.38
725	#15	16	2014	Male	10.9	66.03	58.52	18.38
726	#15	25	2014	Female	13.8	67.51	65.63	18.38
727	#10	26	2014	Male	16.6	69.14	65.73	19
728	#10	23	2013	Female	15.2	67.32	60.74	18.12
729	#10	60	2014	Male	13.3	66.88	69.81	18.66
730	#10	54	2014	Female	13.15	67.48	65.56	18.66
731	#10	30	2013	Female	12.7	66.18	62.54	18.6
732	#10	34	2014	Male	12.2	68	66.81	18.66
733	#10	62	2014	Female	13.9	67.63	67.23	18.66
734	#10	46	2014	Male	14.4	67.11	67.91	18.66
735	#10	52	2013	Female	10.2	65.33	68.43	18.12
736	#10	25	2015	Female	15.4	68.75	70.38	17.69
737	#10	39	2014	Male	14	66.71	63.7	18.66
738	#10	18	2015	Male	13.4	65.15	62.07	17.69
739	#10	69	2013	Male	16.8	69.01	80.11	18.6
740	#10	73	2013	Female	15.4	67.12	74.94	18.6
741	#10	39	2015	Male	10.7	64.13	62.74	17.23
742	#10	73	2015	Male	12	67.14	65.37	17.69
743	#10	60	2015	Female	11.1	66.35	63.93	17.69
744	#10	52	2015	Female	12.6	64.03	66.18	17.69
745	#10	29	2015	Male	15.3	64.87	60.39	17.69
746	#10	24	2015	Male	13.6	65.13	62.39	17.69
747	#10	4	2015	Male	14.5	66.31	60.58	17.69
748	#10	45	2015	Male	13.7	65.13	65.27	17.69
749	#10	29	2015	Male	12.7	68.79	62.69	17.69
750	#10	72	2013	Male	13.5	67.38	72.8	18.12
751	#10	29	2014	Male	11	65.38	57.16	18.66
752	#10	36	2014	Male	16.2	67.26	63.39	18.66
753	#10	72	2014	Female	14.5	66.49	69.16	18.66
754	#10	19	2013	Female	12.7	66.98	56.34	18.12
755	#10	58	2013	Female	12.2	66.38	67.13	18.6
756	#10	73	2013	Female	12.4	66.54	67	18.6
757	#10	31	2015	Female	12.7	65.44	63.58	17.69
758	#10	69	2013	Male	12.8	63.19	74.89	16.39
759	#10	37	2014	Male	8.8	67.14	63.95	18.66
760	#14	7	2013	Male	13	66.4	57.14	17.49
761	#14	67	2014	Male	12.2	66.44	66.88	18.25
762	#14	7	2013	Female	14.4	67.81	47.4	17.49
763	#14	54	2014	Female	12	67.58	67.07	18.25
764	#14	31	2013	Male	10.8	67.18	62.91	17.24
765	#14	33	2013	Male	15.2	66.67	63.6	17.49
766	#14	38	2013	Female	12.2	66.32	66.13	17.03
767	#14	48	2013	Female	12.3	66.52	67.86	17.24
768	#14	10	2015	Male	11.1	64.13	58.43	17.68
769	#14	67	2014	Female	13.5	66.28	67.48	18.25
770	#14	67	2014	Female	14.3	67.48	70.49	18.25
771	#14	61	2013	Male	13.5	65.3	60.73	17.49
772	#14	69	2013	Female	13.2	66.21	65.72	17.49
773	#14	53	2014	Female	11	63.99	63.64	16.78
774	#14	12	2014	Female	14.4	66.54	52.8	18.25
775	#14	26	2014	Female	15.9	66.87	61.35	18.25
776	#14	46	2014	Female	11.4	66.21	66.12	18.25
777	#14	60	2014	Male	13	67.73	70.06	18.25
778	#14	44	2014	Male	11.4	66.29	67.47	18.25
779	#14	61	2014	Female	9.9	65.13	61.25	18.25
780	#14	53	2014	Female	12.1	65.01	66.02	18.25
781	#14	55	2014	Female	11.5	63.21	68.91	16.34
782	#14	72	2014	Male	11.7	66.76	65.76	18.25
783	#14	74	2014	Female	12.4	66.45	67	18.25
784	#14	59	2014	Female	12.4	67.07	67.47	18.25
785	#14	39	2014	Male	12.4	66.41	64.55	18.25
786	#14	62	2014	Female	13.9	65.67	68.55	18.25
787	#14	24	2013	Male	11.3	67.26	56.9	17.24
788	#14	44	2014	Male	12.4	67.39	68.66	18.25
789	#14	39	2014	Male	11.7	67.51	64.48	18.25
790	#14	50	2014	Male	12.2	65.84	62.7	18.25
791	#14	27	2013	Female	16.3	66.88	61.78	17.24
792	#14	41	2013	Male	12.4	67.31	63.98	17.03
793	#14	71	2014	Male	12.9	68.83	73.16	18.25
794	#14	7	2013	Female	11.2	66.49	50.69	17.03
795	#14	44	2014	Female	11.4	65.24	60.07	18.25
796	#14	47	2013	Male	14.7	65.1	68.46	17.03
797	#14	44	2013	Female	15	67.89	65.62	17.03
798	#14	72	2013	Female	12.4	66.43	69.44	17.49
799	#14	48	2014	Female	13.6	65.13	62.93	18.25
800	#14	54	2013	Female	13.7	67.57	67.36	19.31
801	#14	70	2013	Female	12.3	67.46	61.86	17.49
802	#14	40	2015	Male	13.6	66.97	62.61	17.68
803	#14	43	2014	Male	9.2	64.07	56.59	17
804	#14	72	2014	Female	12.9	64.16	61.86	18.01
805	#14	58	2014	Female	12	65.28	69.48	18.25
806	#14	55	2013	Male	12.2	66.91	64.55	17.24
807	#14	68	2014	Male	11.8	66.47	67.29	18.25
808	#14	68	2014	Male	12.7	66.53	66.71	18.25
809	#14	21	2013	Female	14.3	68.04	60.73	17.49
810	#14	51	2014	Male	14.4	67.49	68.13	18.25
811	#14	34	2013	Male	16.2	66.56	75.43	17.24
812	#14	74	2014	Female	13.1	65.12	69.69	18.25
813	#14	73	2013	Male	13.4	67.52	67.53	17.49
814	#14	62	2013	Female	13.7	67.17	67.79	17.24
815	#14	62	2013	Male	14.4	66.02	75.37	17.24
816	#14	48	2013	Female	14.5	68.52	72.6	17.03
817	#16	72	2013	Female	8.3	64.05	64.09	18.35
818	#16	69	2014	Female	11.2	64.66	71.37	17.82
819	#16	54	2013	Female	15.2	70.15	69.03	19.23
820	#16	37	2014	Male	13.3	68.78	67.95	17.82
821	#16	59	2015	Female	13	65.13	69.3	17.33
822	#16	58	2014	Male	15	69.9	74.43	18.32
823	#16	46	2014	Female	12.3	65.88	65.98	17.82
824	#16	61	2013	Male	11.6	66.15	65.01	17.64
825	#16	74	2014	Male	11.9	66.66	72.09	17.82
826	#16	72	2013	Female	11.6	66.94	70.9	18.29
827	#16	62	2013	Female	11.9	67.48	67.8	17.64
828	#16	72	2013	Female	15.3	66.94	74.34	17.64
829	#16	60	2014	Male	12.7	68.83	67.88	17.82
830	#16	47	2014	Male	12.9	67.99	67.84	17.82
831	#16	52	2015	Female	11.7	67.05	66.52	17.33
832	#16	34	2013	Female	12.8	67.48	66.64	18.29
833	#16	68	2013	Female	12.9	63.18	66.7	17.08
834	#16	73	2013	Female	13	63.18	68.11	17.09
835	#16	58	2013	Female	15.4	66.37	65.68	17.64
836	#16	47	2013	Female	13.8	69.15	70.14	18.97
837	#16	46	2014	Male	10.4	68.36	62.32	19.82
838	#16	72	2013	Female	12.2	65.89	68.62	17.64
839	#16	47	2014	Female	14.2	66.01	70.89	17.82
840	#16	53	2015	Female	15.5	68.72	75.33	17.33
841	#16	73	2013	Female	11.8	64.19	66.97	17.64
842	#16	73	2013	Male	12.6	64.56	68.68	17.64
843	#16	72	2013	Female	12.5	63.91	67.11	18.35
844	#16	74	2014	Male	16	69.84	70.56	19.15
845	#16	45	2013	Male	15.3	68.15	69.84	17.64
846	#16	55	2013	Female	12.6	66.34	73.69	17.64
847	#16	68	2013	Male	9.2	64.52	64.66	17.64
848	#16	51	2013	Female	11.2	62.01	57.86	15.95
849	#16	74	2014	Female	12.4	69.33	69.68	17.92
850	#16	52	2013	Male	11.4	63.25	66.33	18.35
851	#16	52	2013	Female	11.2	63.27	64.88	16.2
852	#16	54	2013	Male	11.6	65.29	68.87	17.64
853	#16	54	2013	Female	11.8	62.87	63.28	17.23
854	#16	54	2013	Female	12.2	64.13	64.06	17.64
855	#16	68	2013	Female	13.5	64.36	66.78	18.29
856	#16	58	2013	Male	10.9	64.91	68.63	17.64
857	#16	74	2014	Male	12	64.75	73.66	17.82
858	#16	65	2013	Female	12.5	70.12	76.19	19.03
859	#16	74	2014	Female	12.6	64.36	68.58	17.82
860	#16	67	2014	Female	13.4	65.62	67.37	17.82
861	#16	67	2014	Male	11.8	67.74	69.64	17.82
862	#16	71	2014	Male	16	65.4	71.64	17.82
863	#16	64	2014	Female	13.6	64.19	66.39	17.82
864	#16	53	2014	Male	11.3	68.05	71.01	17.82
865	#16	40	2014	Female	13.4	65.32	69.88	17.82
866	#16	74	2014	Male	12.2	65.04	65.82	17.82
867	#16	47	2014	Female	15.5	62.37	65.76	16.82
868	#1	28	2013	Female	11.3	66.58	55.28	17.82
869	#1	52	2013	Female	13.3	67.42	71.64	17.62
870	#1	61	2014	Female	14.5	66.36	67.61	18.11
871	#1	46	2014	Male	16	67.21	66.32	18.11
872	#1	33	2014	Female	9.4	67.22	67.11	18.11
873	#1	33	2015	Male	13	69.06	63.27	18.25
874	#1	24	2015	Female	13.1	70.73	61.54	18.25
875	#1	33	2015	Female	12.4	64.54	61.52	18
876	#1	47	2013	Female	13.7	63.73	64.95	16.5
877	#1	51	2013	Female	13.4	65.28	70.33	17.56
878	#1	4	2015	Female	12.6	66.79	50.77	18.25
879	#1	64	2014	Male	11.4	67.8	66.83	18.11
880	#1	16	2014	Female	18.8	70.18	63.4	18.11
881	#1	55	2014	Female	17.1	67.76	69.45	18.11
882	#1	72	2014	Male	16	67.64	67.37	18.11
883	#1	72	2013	Female	9.8	68.05	69.95	17.86
884	#1	46	2014	Male	11.7	69.71	74.7	18.11
885	#1	60	2014	Female	16.3	68.12	70.01	18.11
886	#1	10	2015	Male	12	67.15	53.26	18.25
887	#1	62	2013	Female	12.6	66.01	72.14	18.91
888	#1	39	2014	Female	12.4	66.45	70.5	18.11
889	#1	57	2014	Male	14.1	66.34	67.2	18.11
890	#1	49	2013	Female	13.6	66.91	64.71	17.63
891	#1	24	2013	Male	14.5	67.88	64.36	17.8
892	#1	47	2013	Male	16.5	66.89	75.3	17.63
893	#1	72	2013	Female	13.2	67.28	67.11	17.63
894	#1	44	2013	Male	13.4	63.52	64.86	16.58
895	#1	26	2014	Female	16.6	67.82	61.21	18.11
896	#11	12	2014	Male	11.2	66.67	59.24	18.68
897	#11	27	2014	Female	13.7	66.71	62.68	18.68
898	#11	54	2014	Female	13.9	67.31	70.87	18.68
899	#11	41	2014	Female	14.8	67.02	69.65	18.68
900	#11	57	2014	Female	12.4	66.55	71.16	18.68
901	#11	53	2014	Female	12.7	66.74	67.59	18.68
902	#11	11	2014	Female	11.3	66.98	56.67	18.68
903	#11	18	2014	Female	11.7	67.56	55.11	18.68
904	#11	67	2014	Female	11.5	67.55	68.13	18.68
905	#11	74	2014	Male	NA	67.39	68.61	18.68
906	#11	46	2014	Female	11.5	68.46	70.65	18.68
907	#11	25	2014	Male	15.7	67.23	61.39	18.68
908	#11	20	2014	Female	10.9	66.19	57.17	18.68
909	#11	46	2014	Male	12.6	67.52	68.11	18.68
910	#11	54	2014	Female	14.4	68.39	73.66	18.68
911	#11	19	2014	Male	15.5	66.54	60.48	20.1
912	#11	5	2014	Male	16.7	66.32	57.13	18.68
913	#11	23	2014	Female	9.4	67.52	64.26	18.68
914	#11	32	2014	Female	14.5	66.41	65.06	18.68
915	#11	68	2013	Male	10.5	67.88	69.24	18.63
916	#11	29	2015	Female	13.2	64.86	53.81	17.64
917	#11	26	2014	Female	13.4	68.05	61.87	18.68
918	#11	36	2014	Female	9.4	66.94	64.68	18.68
919	#11	60	2014	Female	12.9	66.19	70.96	18.68
920	#11	7	2013	Female	10.4	65.12	44.84	18.11
921	#11	6	2013	Male	14.1	67.67	60.65	18.63
922	#11	56	2013	Male	21.4	70.99	72.78	18.52
923	#11	27	2013	Female	13.8	67.9	61.69	18.63
924	#11	27	2013	Male	11.1	66.85	66.09	18.52
925	#11	22	2014	Female	10	67.61	58.41	18.68
926	#11	37	2013	Male	11.9	66.6	67.18	18.52
927	#11	38	2013	Male	14.5	68.56	70.17	18.52
928	#11	67	2015	Male	15.5	NA	NA	19.04
929	#11	17	2013	Male	14.2	67.31	60.17	18.11
930	#11	41	2014	Female	10.4	65.49	65.65	18.68
931	#11	29	2014	Male	14	67.33	63.49	18.68
932	#11	7	2013	Male	14.6	64.74	58.73	18.63
933	#11	5	2013	Female	12.7	67.33	53.18	18.63
934	#11	20	2013	Male	16.4	68.91	66.1	18.63
935	#11	51	2013	Female	12.7	66.54	74.26	18.63
936	#8	40	2013	Female	14.6	63.52	63.86	17.02
937	#8	62	2014	Female	11.8	65.84	68.51	19.42
938	#8	61	2014	Female	13.2	66.42	67.53	19.42
939	#8	68	2014	Male	15.2	68.88	72.14	19.42
940	#8	73	2013	Female	14.6	67.88	70.95	19.01
941	#8	69	2014	Male	13.3	68.02	66.25	19.42
942	#8	64	2014	Male	14.7	70.48	74.6	19.42
943	#8	12	2013	Male	10.6	66.91	62.71	19.01
944	#8	68	2014	Female	11.5	65.12	68.82	17.25
945	#8	68	2013	Female	17.2	67.58	66.39	19.28
946	#8	40	2013	Female	12.7	64.96	69.86	18.35
947	#8	69	2013	Female	14.7	67.56	72.72	19.28
948	#8	33	2013	Female	15.1	67.81	69.1	19.01
949	#8	47	2013	Female	14	66.02	63.4	19.28
950	#8	72	2013	Female	11.9	69.03	71.15	19.28
951	#19	32	2015	Female	13.9	70.51	76.62	18.76
952	#19	72	2014	Male	11.2	67.87	68.21	18.32
953	#19	53	2014	Female	10.9	66.13	63.3	18.32
954	#19	18	2015	Male	15.8	69.12	62.96	18.76
955	#19	46	2014	Female	15.6	65.83	62.71	18.32
956	#19	48	2013	Female	15	66.54	76.79	18.33
957	#19	41	2014	Female	11.9	67.96	66.69	18.32
958	#19	69	2014	Female	NA	NA	NA	18.32
959	#19	20	2013	Female	14.9	67.09	63.33	18.33
960	#19	5	2013	Male	12.2	66.65	67.78	18.11
961	#19	41	2013	Male	14.7	65.48	67.03	18.33
962	#19	20	2013	Male	17	67.31	67.86	18.44
963	#19	9	2014	Male	12.7	64.02	57.15	16.94
964	#19	47	2014	Female	11.4	66.96	67.48	18.32
965	#19	27	2013	Female	13.7	66.36	69.29	18.33
966	#19	9	2013	Female	15.7	65.43	54.54	18.33
967	#19	9	2013	Male	17.2	65.21	58.22	18.11
968	#19	17	2015	Female	10.9	64.55	62.59	16.76
969	#19	12	2013	Male	13.2	67.84	57.37	19.34
970	#19	39	2015	Female	10.9	66.37	71.79	18.76
971	#17	71	2014	Female	11.35	65.49	64.38	17.06
972	#17	73	2015	Male	11.4	64.17	68.34	16.85
973	#17	48	2014	Female	9.5	66.14	63.7	17.06
974	#17	47	2014	Female	10.8	66.94	64.64	17.06
975	#17	54	2014	Female	12.2	67.01	63.21	17.06
976	#17	47	2014	Female	16.8	66.59	63.58	17.06
977	#17	28	2015	Female	11.9	64.28	57.69	17.2
978	#17	59	2015	Male	11.8	66.12	71.69	18.5
979	#17	71	2015	Female	9.3	63.97	65.17	16.49
980	#17	40	2014	Male	9.5	66.31	63.27	17.06
981	#17	68	2014	Male	12.9	65.13	71.02	17.06
982	#17	17	2015	Female	11.8	63.97	53.48	16.43
983	#17	73	2015	Female	11.9	64.55	64.42	16.5
984	#17	22	2015	Female	14.4	65.03	61.05	18.5
985	#17	39	2015	Female	12.5	65.14	65.83	18.5
986	#17	53	2014	Female	15.5	68.94	71.28	17.06
987	#1	39	2014	Female	17.2	66.13	68.4	18.11
988	#1	11	2015	Male	12.1	70.4	59.16	19.26
989	#1	37	2014	Male	14.4	66.86	64.4	18.11
990	#1	13	2014	Female	11.7	67.43	58.79	18.11
991	#1	50	2014	Male	17.2	67.64	69.79	18.11
992	#1	42	2015	Male	12.9	69.3	66.84	18.25
993	#1	36	2014	Male	11	67.76	61.97	18.11
994	#1	54	2014	Female	14.4	67.86	68.71	18.11
995	#1	5	2015	Female	11	66.12	49.28	18.25
996	#1	53	2014	Female	13.8	65.79	67.79	18.11
997	#1	32	2014	Female	15	67.27	68.32	18.11
998	#1	67	2014	Female	11.9	67.54	70.22	18.11
999	#1	35	2015	Male	13.9	73.27	71.24	18.25
1000	#1	11	2014	Male	13.9	67.98	60.82	18.11
1001	#1	37	2014	Male	13.4	67.65	62.92	18.11
1002	#1	46	2014	Female	14.6	67.83	70.2	18.11
1003	#1	50	2014	Male	14.8	66.21	69.4	18.11
1004	#1	29	2014	Male	14.1	67.32	62.43	18.11
1005	#1	29	2014	Male	16.8	66.51	61.8	18.11
1006	#1	43	2014	Male	13.1	66.42	65.85	18.11
1007	#1	43	2014	Female	12.9	66.55	66.09	18.11
1008	#1	71	2014	Female	12	65.77	73.55	18.11
1009	#1	25	2014	Female	14.6	65.99	64.58	18.11
1010	#1	30	2014	Male	15.3	68.32	60.4	18.11
1011	#1	68	2014	Male	14.2	67.89	70.52	18.11
1012	#1	38	2015	Male	13.9	68.05	65.35	18.25
1013	#1	67	2014	Male	12.2	68.18	69.68	18.11
1014	#13	41	2014	Male	14	72.67	68.56	19.74
1015	#13	47	2014	Female	15.2	69.44	68.1	18.17
1016	#13	71	2014	Female	10.9	68.32	64.71	17.78
1017	#13	50	2014	Female	14.5	68.76	67.83	17.78
1018	#13	68	2014	Female	12.4	68.43	69.41	19.74
1019	#13	55	2014	Male	11.2	68.35	69.77	19.55
1020	#13	26	2014	Male	11.7	80.72	53.61	18.74
1021	#13	23	2014	Male	10.2	65.42	59.89	17.78
1022	#13	25	2014	Female	12.1	66.45	61.76	17.78
1023	#13	32	2014	Female	10.7	62.15	60.79	17.03
1024	#13	11	2014	Female	9.6	67.45	57.16	17.78
1025	#3	38	2015	Male	12.8	68.6	65.79	19.6
1026	#3	67	2014	Female	12.4	66.27	67.5	19.65
1027	#3	72	2014	Male	15.7	66.15	71.67	19.65
1028	#3	31	2015	Female	13	70.63	66.19	19.6
1029	#3	19	2014	Male	18.4	66.52	60.09	19.65
1030	#3	40	2015	Female	13	67.27	59.51	19.6
1031	#3	52	2015	Male	15.6	74.02	70.55	19.6
1032	#3	54	2014	Female	12.9	66.65	67	19.65
1033	#3	39	2014	Male	12.9	67.73	63.7	19.65
1034	#3	16	2014	Male	13.9	67.18	61.8	19.65
1035	#3	46	2014	Female	12.5	66.92	65.73	19.65
1036	#4	25	2015	Male	7.5	67.94	60.56	17
1037	#4	58	2014	Female	11.5	64.99	65.15	17.22
1038	#4	57	2014	Male	12	67.83	67.21	16.26
1039	#4	2	2014	Female	10	63.18	51.07	16.26
1040	#6	1	2015	Female	11.5	67.82	50.25	18.5
1041	#6	52	2015	Female	13.1	63.98	58.03	16.83
1042	#4	1	2015	Male	9.4	69.11	59.93	17.5
1043	#6	66	2015	Female	15.5	64.61	69.2	17.5
1044	#6	74	2015	Female	12.4	60.15	70.1	15.95
1045	#6	8	2015	Male	9.5	NA	NA	18.5
1046	#4	4	2015	Female	9.3	62.88	45	16.31
1047	#6	47	2015	Female	12.7	67.56	67.77	18.5
1048	#6	4	2015	Female	16	67.88	45.76	18.5
1049	#6	47	2015	Female	12.6	66.56	67.87	18.5
1050	#6	59	2015	Female	13.7	NA	NA	18.5
1051	#5	47	2015	Male	13.2	65.9	59.66	17
1052	#5	52	2015	Male	13.3	71.56	65.41	19.11
1053	#5	52	2015	Female	12.9	67.02	63.73	17
1054	#5	24	2015	Female	11.4	NA	NA	19
1055	#5	33	2015	Male	12.7	68.22	57.52	17
1056	#5	56	2015	Female	13.7	64.73	69.35	17
1057	#5	56	2015	Female	14.8	65.61	69.37	17
1058	#5	43	2014	Female	12.1	66.23	63.92	17.98
1059	#5	1	2014	Female	12.1	66.52	51.17	17.98
1060	#5	19	2015	Female	13.4	63.68	50.76	17
1061	#5	22	2014	Female	13.6	67.12	61.62	17.98
1062	#5	55	2014	Female	11.5	66.92	67.4	17.98
1063	#5	61	2014	Male	13.1	67.23	67.76	17.98
1064	#5	28	2015	Male	10.1	70.11	59.82	18.95
1065	#5	53	2014	Male	16.4	66.45	65.79	17.98
1066	#5	50	2014	Female	16	67.06	65.39	17.98
1067	#5	34	2014	Female	13.2	66.72	63.51	17.98
1068	#5	48	2014	Female	10.8	66.68	64.29	17.98
1069	#5	1	2015	Female	9.2	65.87	46.82	17
1070	#5	33	2015	Female	8.6	68.52	65.39	17
1071	#5	64	2014	Female	14.4	66.67	67.49	17.98
1072	#5	22	2014	Male	11	67.24	60.9	17.98
1073	#5	33	2014	Female	14.2	66.03	62.29	17.98
1074	#5	64	2014	Male	11.5	67.44	67.26	17.98
1075	#5	68	2014	Female	13.4	67.83	66.74	17.98
1076	#5	44	2014	Female	14.5	66.43	66.28	17.98
1077	#5	7	2015	Male	12.2	70.92	56.58	18.45
1078	#5	38	2015	Male	13.2	71.52	67.31	19.03
1079	#5	71	2015	Female	12.9	79.25	61.97	19.26
1080	#5	2	2014	Male	11.3	66.49	56.93	17.98
1081	#6	5	2014	Male	12.3	63.25	54.17	16.31
1082	#6	53	2014	Female	14.4	66.45	70.69	18.2
1083	#6	58	2014	Male	8.2	63.45	60.44	17
1084	#6	22	2015	Female	13.1	71.14	64.76	18.5
1085	#6	55	2014	Female	11.8	66.92	65.67	18.2
1086	#6	8	2014	Male	12	66.87	58.27	18.2
1087	#6	64	2014	Female	11.4	66.2	69.67	18.2
1088	#6	74	2014	Male	18.1	70.21	73.81	18.2
1089	#6	18	2014	Female	13.3	67.63	61.02	18.2
1090	#6	60	2015	Male	11.4	63.46	68.93	17.02
1091	#6	74	2014	Female	13.4	68.39	70.04	18.2
1092	#6	27	2014	Female	14.9	68.19	64.63	18.2
1093	#6	65	2014	Male	12.7	68.21	71.06	18.2
1094	#6	62	2014	Male	17	69.36	71.14	19.12
1095	#6	63	2015	Female	11.9	68.45	74.71	18.5
1096	#6	28	2015	Female	13.1	68.58	61.05	18.5
1097	#6	46	2015	Male	14.7	66.72	70.15	18.5
1098	#6	25	2015	Male	12.8	62.96	57.67	15.89
1099	#6	25	2015	Male	12.7	NA	NA	18.5
1100	#6	29	2015	Male	7.4	67.26	61.93	18.5
1101	#6	19	2015	Female	13.9	66.3	57.39	17.5
1102	#6	66	2015	Female	8.9	66.05	71.72	18.5
1103	#4	67	2015	Female	11.8	65.23	71.36	17
1104	#6	59	2015	Female	12.6	66.21	69.27	18.5
1105	#6	25	2015	Female	12.7	67.93	61.07	18.5
1106	#7	17	2015	Male	14.3	66.54	47.29	18.33
1107	#7	61	2014	Female	18	66.54	70.91	17.41
1108	#7	61	2014	Female	14.8	68.42	68.8	19.41
1109	#7	26	2014	Male	13.1	66.67	60.54	17.41
1110	#7	47	2014	Female	12.4	67.21	65.1	17.41
1111	#7	68	2014	Female	10	63.01	59.33	16.37
1112	#7	71	2014	Female	10.8	67.02	66.03	17.41
1113	#7	47	2015	Female	11.5	63.48	65.32	17.12
1114	#7	45	2015	Female	10.9	67.99	59.72	18.33
1115	#7	33	2015	Male	12.1	70.02	63.46	18.33
1116	#7	53	2015	Female	12	69.38	65.01	18.33
1117	#7	70	2015	Male	14.1	63.6	64.15	17.05
1118	#7	24	2015	Female	12.4	65.04	59.36	18.33
1119	#7	70	2015	Male	9	67.67	63.5	18.33
1120	#7	52	2015	Male	11.6	65.25	67.14	18.33
1121	#7	67	2015	Male	13.5	67.23	67.91	18.33
1122	#7	67	2015	Male	11.7	69.19	66.22	18.33
1123	#7	24	2015	Male	14.1	68.46	60.91	18.33
1124	#7	60	2015	Female	9.1	66.86	62.52	18.33
1125	#7	38	2015	Male	11.4	67.73	63.37	18.33
1126	#7	42	2015	Male	12	64.5	64.37	17.33
1127	#7	15	2015	Male	13.3	66.19	59.82	18.33
1128	#7	60	2015	Female	10.4	NA	NA	18.33
1129	#7	73	2015	Male	12.1	68.06	68.43	18.33
1130	#7	73	2015	Male	11.9	70.21	68.35	18.33
1131	#7	61	2015	Male	12.4	64.15	63.9	17.88
1132	#7	47	2015	Female	12.4	69.07	68.68	18.33
1133	#7	50	2015	Male	12.4	65.1	64.59	18.33
1134	#14	71	2015	Female	11.9	69.31	64.15	17.98
1135	#14	66	2015	Female	12.1	66.38	67.29	17.68
1136	#16	64	2014	Female	16.5	71.62	70.32	17.82
1137	#7	58	2014	Female	12.2	64.12	68.75	17.41
1138	#7	6	2014	Male	13.1	66.45	57.47	17.41
1139	#7	69	2014	Male	12.1	66.55	67.96	19.64
1140	#7	26	2014	Male	4.7	62.97	52.06	17.41
1141	#7	4	2014	Male	12.1	66.54	59.78	17.41
1142	#7	71	2014	Male	13.4	66.02	67.89	17.41
1143	#7	73	2015	Female	12.5	69.04	69.21	18.33
1144	#7	64	2014	Female	9.5	67.31	66.87	17.41
1145	#18	53	2014	Male	14	64.63	75.56	17.68
1146	#18	3	2015	Female	12.9	61.63	55.95	16.05
1147	#18	40	2014	Male	15.2	66.19	63.85	18.68
1148	#18	66	2015	Female	11.9	66.44	68.43	18.89
1149	#18	4	2014	Male	12.4	65.91	61.02	18.68
1150	#18	48	2014	Female	15.9	67.82	70.7	18.68
1151	#18	64	2014	Female	13.9	65.41	66.8	18.68
1152	#18	37	2014	Male	12.2	66.38	66.63	18.68
1153	#18	53	2014	Male	15.4	69.13	73.82	18.68
1154	#18	54	2014	Male	15.8	65.25	71.72	18.68
1155	#18	44	2014	Male	14.7	61.97	73.66	16.12
1156	#18	18	2015	Male	15.5	68.58	58.46	18.89
1157	#18	43	2015	Male	14.2	70.07	66.78	18.89
1158	#18	46	2015	Male	13.9	NA	NA	18.89
1159	#18	63	2015	Male	14.2	69.56	68.1	18.89
1160	#18	70	2015	Male	12.8	69.14	71.43	18.89
1161	#18	56	2015	Female	10.5	67.2	67.75	18.89
1162	#18	38	2015	Female	10.9	65	66.7	17.03
1163	#18	66	2015	Female	11.9	67.37	71.7	18.89
1164	#18	63	2015	Female	10.4	64.3	64.11	18.02
1165	#18	18	2015	Female	11.7	69.46	62.23	18.89
1166	#2	54	2014	Male	10.4	67.81	65.91	18.21
1167	#2	60	2015	Male	12.6	69.5	69.04	18.88
1168	#2	73	2015	Female	12.6	68.08	71.94	18.88
1169	#2	44	2014	Female	9.8	66.29	66.15	18.21
1170	#2	74	2015	Male	12.1	70.73	71.13	18.88
1171	#2	26	2014	Male	13.2	68.76	62.29	18.21
1172	#2	39	2014	Male	10.7	67.78	64.83	18.21
1173	#2	68	2014	Male	9.8	64.54	67.9	18.21
1174	#2	68	2014	Male	10.1	65.23	69.68	18.21
1175	#2	67	2014	Female	13.4	68.27	68.15	18.21
1176	#2	72	2014	Male	13.3	68.29	68.02	18.21
1177	#2	10	2015	Female	13.8	67.71	45.06	18.88
1178	#2	64	2015	Male	11.1	64.4	65.72	17.88
1179	#2	46	2014	Male	10.3	64.15	63.01	17.5
1180	#2	74	2014	Male	10.8	65.34	67.67	18.21
1181	#2	38	2015	Male	15.6	67.73	67.07	18.88
1182	#2	29	2015	Female	8.4	65.28	58.54	18.88
1183	#2	53	2015	Female	12.4	70.62	65.71	18.88
1184	#2	68	2015	Male	12.7	67.53	66.02	18.88
1185	#2	52	2015	Male	10.1	70.5	67.48	20.15
1186	#2	25	2015	Male	11.6	69	62.6	18.88
1187	#2	60	2015	Female	15.1	67.99	66.83	18.88
1188	#2	12	2015	Male	8.1	65.36	50.71	18.88
1189	#2	74	2015	Female	14.4	68.98	68.38	18.88
1190	#2	59	2015	Male	14.1	72.69	70.09	18.88
1191	#2	4	2015	Male	10.6	66.93	55.28	18.88
1192	#2	5	2015	Male	10.4	68.6	56.48	18.88
1193	#2	5	2015	Male	10.5	69.38	56.64	18.88
1194	#2	4	2015	Male	9	65.12	53.05	17.85
1195	#2	60	2015	Female	12	NA	NA	18.88
1196	#2	53	2014	Male	14.6	69.36	65.02	19.21
1197	#2	25	2015	Male	13.6	74.04	68.65	18.88
1198	#2	61	2015	Male	13	68.15	64.31	18.88
1199	#2	62	2014	Female	13.3	68.63	64.78	18.21
1200	#2	65	2014	Female	13.4	65.83	67.89	18.21
1201	#2	67	2014	Male	6.7	65.32	68.32	18.21
1202	#2	4	2014	Male	12.3	68.23	54.04	18.21
1203	#2	13	2014	Female	11.4	66.34	55.48	18.21
1204	#2	25	2014	Male	11.2	63.52	59.86	17.05
1205	#2	11	2014	Male	12.9	65.91	61.46	18.21
1206	#2	73	2015	Male	11.8	66.31	67.51	18.88
1207	#2	28	2015	Male	15.2	68.44	60.54	18.88
1208	#2	70	2015	Female	11.7	68.49	62.78	18.88
1209	#17	71	2015	Female	14.8	63.28	73.73	16.59
1210	#17	59	2015	Female	15.1	68.79	70.24	18.5
1211	#17	73	2015	Male	12.6	65.31	70.38	17.5
1212	#3	33	2015	Female	11.9	68.5	62.86	19.6
1213	#3	60	2014	Male	12.9	66.08	68.48	19.65
1214	#3	9	2014	Male	12.4	67.15	58.5	19.65
1215	#3	38	2015	Male	12.7	67.78	63.95	19.6
1216	#3	43	2014	Female	10.7	66.31	65.67	19.65
1217	#3	60	2014	Female	8.6	64.16	63.02	17.66
1218	#3	48	2014	Male	15	66.28	70.93	19.65
1219	#3	73	2015	Male	13.6	72.8	68.98	19.6
1220	#3	64	2014	Male	13.4	67.85	67.47	19.65
1221	#3	58	2014	Female	14	68.22	65.5	19.65
1222	#3	54	2015	Female	14.1	69.9	66.42	19.6
1223	#12	10	2015	Female	11.2	71.55	58.03	19.25
1224	#12	67	2014	Female	13	66.91	70.8	18.9
1225	#12	48	2015	Female	13.8	68.32	67.19	18.9
1226	#12	49	2015	Male	12	65.7	66.17	17.1
1227	#12	67	2014	Female	12.5	66.07	68.21	18.9
1228	#12	74	2014	Male	14.7	67.81	66.07	18.9
1229	#12	46	2014	Male	13.4	66.19	70.93	18.9
1230	#12	6	2014	Male	11.6	67.87	54.55	18.9
1231	#12	61	2014	Female	11.4	66.45	67.09	18.9
1232	#12	61	2014	Male	12.8	66.52	67.57	18.9
1233	#12	37	2014	Male	15.4	67.32	63.21	18.9
1234	#12	50	2014	Male	14.2	66.43	66.4	18.9
1235	#12	45	2015	Female	12	66.52	68.02	18.9
1236	#12	29	2014	Female	12.1	67.89	60.82	18.9
1237	#12	43	2015	Female	11	69.25	68.19	18.95
1238	#12	59	2015	Female	11.3	63.88	65.96	16.9
1239	#12	61	2014	Male	11.3	67.28	70.23	18.9
1240	#12	54	2014	Male	10.4	66.58	67.16	18.9
1241	#12	25	2014	Male	13.8	66.21	62.01	18.9
1242	#12	12	2015	Male	8.8	66.44	55.01	18.9
1243	#12	60	2014	Female	13.5	66.81	67.21	18.9
1244	#12	71	2014	Male	15.7	70.02	72.99	18.9
1245	#12	17	2015	Male	12.5	65.89	61.12	18.9
1246	#12	38	2015	Female	13.7	66.96	62.71	18.9
1247	#12	73	2015	Female	15.5	68.88	68.22	18.9
1248	#12	49	2015	Male	15.6	71.68	72.57	18.9
1249	#12	71	2015	Male	13.3	65.2	68.67	18.9
1250	#12	11	2015	Male	12.4	67.07	58.52	18.9
1251	#12	46	2015	Male	14.4	67.42	66.56	18.9
1252	#12	61	2015	Male	13.4	69.65	67.95	18.9
1253	#12	15	2015	Female	13.6	66.87	56.96	18.9
1254	#12	32	2015	Female	13.9	64.39	65.73	17.33
1255	#12	73	2015	Male	12.6	64.55	74.17	16.32
1256	#12	73	2015	Male	12.8	64.97	75.12	17.9
1257	#12	73	2015	Female	13.9	66.79	69.61	18.9
1258	#12	63	2015	Male	13.9	71.02	70.67	18.9
1259	#12	73	2015	Male	16.4	NA	NA	18.9
1260	#12	46	2015	Male	14.9	63.38	70.93	17.34
1261	#12	67	2015	Female	13.4	67.34	70.34	18.9
1262	#12	67	2015	Female	12.3	65.35	72.73	18.9
1263	#20	17	2015	Female	12.4	69.84	57.19	18.25
1264	#20	4	2015	Male	12.2	70.67	56.44	18.25
1265	#20	38	2015	Male	14.5	68.73	61.24	18.25
1266	#20	67	2015	Female	13.2	67.39	73.87	18.25
1267	#20	38	2015	Male	11.9	68.77	65.3	18.25
1268	#20	38	2015	Male	13.7	66.62	67.84	18.25
1269	#20	74	2015	Male	11	63.26	67.24	16.37
1270	#20	53	2015	Female	11	69.55	66.63	18.25
1271	#20	53	2015	Male	13	69.6	68.11	18.25
1272	#20	38	2015	Female	13.1	68.81	66.12	18.25
1273	#20	39	2015	Male	11.9	70.3	71.42	18.25
1274	#20	35	2015	Male	11.9	68.11	63.65	18.25
1275	#20	52	2014	Female	9	66.01	62.74	17
1276	#20	57	2014	Female	13.1	67.86	73.97	17
1277	#20	56	2014	Male	12.4	65.56	63.2	17
1278	#20	36	2014	Female	9.6	64.06	62.37	17
1279	#20	65	2014	Male	12.8	67.16	69.05	18.5
1280	#20	47	2014	Male	9.3	67.98	63.96	17
1281	#20	40	2014	Male	8.7	64.67	58.56	17
1282	#20	32	2014	Female	10.8	66.23	63.01	17
1283	#20	18	2014	Female	12.9	67.72	56.01	17
1284	#21	40	2014	Male	11.2	67.82	64.05	18.17
1285	#21	24	2015	Female	12	64.13	57.25	17.1
1286	#21	39	2014	Male	12.5	66.56	65.87	18.17
1287	#21	33	2014	Male	10.7	66.69	63.92	18.17
1288	#21	54	2014	Male	10.2	66.58	66.44	18.17
1289	#21	26	2014	Female	12.8	66.12	61.03	18.17
1290	#21	40	2014	Female	10.6	66.42	58.63	18.17
1291	#21	72	2014	Male	12.7	66.01	70.07	18.17
1292	#21	52	2015	Male	11.2	67.94	62.08	17.1
1293	#21	18	2015	Male	15.8	64.65	57.86	17.1
1294	#21	67	2014	Female	10.4	66.57	67.08	18.17
1295	#21	62	2014	Female	10.9	66.43	68.39	18.17
1296	#21	71	2014	Male	11.2	66.35	68.87	18.17
1297	#21	53	2014	Female	11	66.31	65.81	18.17
1298	#21	39	2015	Female	10.9	66.87	68.28	17.1
1299	#21	70	2015	Female	13.2	67.19	65.32	17.1
1300	#21	55	2014	Female	12.2	66.22	65.85	18.17
1301	#21	47	2015	Male	12.1	65.31	63.43	17.1
1302	#21	18	2015	Female	12.3	63.15	57.87	16.15
1303	#21	73	2015	Male	13	65.27	71.14	17.1
1304	#21	60	2014	Male	11.2	67.13	66.41	18.17
1305	#21	53	2014	Male	12.5	65.76	62.23	18.17
1306	#21	71	2015	Female	10.3	64.58	64.5	17.1
1307	#21	61	2015	Female	7.9	64.38	64.75	17.1
1308	#21	67	2015	Female	11.9	63.49	62.86	17.1
1309	#21	61	2015	Female	12.9	66.34	66.17	17.1
1310	#21	70	2015	Female	11.6	63.15	66.64	17.09
1311	#13	74	2014	Female	12.4	68.32	68.99	17.78
1312	#13	24	2015	Male	10	64.12	55.31	17
1313	#13	24	2015	Female	9.6	63.89	57.25	17
1314	#13	59	2015	Female	12.6	66.98	68.28	18.89
1315	#13	67	2014	Female	13	67.84	69.07	17.78
1316	#13	74	2015	Male	14.1	67.19	69.09	17
1317	#13	67	2014	Female	9.4	67.62	64.97	17.78
1318	#13	2	2014	Female	12.2	61.4	51.32	16.94
1319	#13	53	2014	Male	14.5	71.1	70.86	19.65
1320	#13	61	2014	Male	13.2	74.26	64.05	17.78
1321	#13	54	2014	Male	14.3	68.02	68.23	17.78
1322	#13	67	2014	Female	11.3	67.25	67.94	17.78
1323	#13	68	2014	Female	10.8	64.3	61.84	17.78
1324	#13	52	2015	Female	11.4	65.87	79.26	17
1325	#13	61	2014	Female	11.5	66.82	66.63	17.78
1326	#13	22	2015	Female	13.7	63.91	59.26	16.89
1327	#13	43	2015	Female	13.4	65.93	72.94	17
1328	#13	71	2014	Male	10.5	67.12	71.32	17.78
1329	#13	54	2014	Female	13.4	68.55	67.43	17.78
1330	#13	64	2015	Female	13.1	66.74	70.4	17
1331	#13	59	2015	Female	13.6	66.12	72.99	17
1332	#13	15	2015	Male	14.1	65.22	63.22	17
1333	#13	42	2015	Female	13	66.37	65.88	17
1334	#13	73	2015	Male	13.1	66.37	72.54	17
1335	#13	59	2015	Female	13.4	66.24	71.93	17
1336	#13	67	2015	Female	11	65.14	68.13	17
1337	#13	61	2015	Female	13.2	66.91	73.24	17
1338	#13	50	2015	Female	14.4	66.57	70.26	17
1339	#13	63	2015	Female	9.9	65.88	68.14	17
1340	#13	47	2015	Male	11.8	65.13	63.87	17
1341	#13	42	2015	Male	12.6	66.81	67.4	17
1342	#13	46	2015	Female	11.8	65.94	67.24	17
1343	#13	33	2015	Female	12.1	67.18	70.53	18
1344	#13	68	2015	Male	13.1	66.98	68.64	17
1345	#13	73	2015	Female	13.4	67.45	72.58	17
1346	#13	26	2015	Female	12.2	65.11	68.76	17
1347	#13	4	2015	Male	13.2	64.12	51.86	17
1348	#13	46	2015	Female	12.4	66.12	65.76	17
1349	#13	70	2015	Male	13.3	66.97	68.04	17
1350	#13	70	2015	Female	14.5	68.24	72.05	17
1351	#13	66	2015	Female	16.4	68.79	74.18	17
1352	#15	31	2015	Female	13.9	67.48	60.38	18.58
1353	#15	24	2015	Male	14.8	68.41	56.61	18.58
1354	#15	25	2015	Female	12.4	67.48	63.46	18.58
1355	#15	38	2015	Male	13.4	65.29	67.6	18.58
1356	#15	45	2015	Female	15.1	66.89	71.12	18.58
1357	#15	22	2015	Male	11.5	68.11	62.3	18.58
1358	#15	59	2015	Male	10.4	68.75	70.04	18.58
1359	#15	61	2015	Male	13.1	68.73	73.58	18.58
1360	#15	63	2015	Female	13.9	66.49	62.65	18.58
1361	#15	58	2014	Female	10.9	66.23	68.28	18.38
1362	#15	48	2014	Female	12.6	65.85	62.82	18.38
1363	#15	37	2014	Female	9.2	65.49	66.02	18.38
1364	#15	25	2014	Female	12.8	67.91	66.24	18.38
1365	#15	67	2014	Female	13.7	70.44	72.12	19.33
1366	#15	32	2014	Male	12.9	67.19	66.4	18.38
1367	#15	46	2014	Male	14.2	66.97	66.54	18.38
1368	#15	15	2014	Male	10.5	65.03	57.49	18.38
1369	#15	26	2014	Female	13	63.84	60.15	16.34
1370	#15	50	2014	Female	15.2	68.27	68.9	18.38
1371	#15	20	2014	Female	13.2	65.57	60.95	18.38
1372	#15	67	2014	Male	10.3	67.43	62.84	18.38
1373	#15	70	2015	Male	11.1	67.89	63.39	18.58
1374	#15	25	2014	Male	9.2	62.01	55.58	16.84
1375	#15	74	2014	Male	12.8	66.97	64.55	18.38
1376	#15	64	2015	Male	12.1	68.47	67.02	18.58
1377	#15	54	2014	Female	11.6	66.59	62.87	18.38
1378	#15	26	2015	Female	14.1	65.98	54.15	18.58
1379	#15	18	2014	Female	12.5	64.57	55.68	17.15
1380	#15	44	2014	Male	13.3	68.74	68.48	18.38
1381	#15	44	2014	Male	15	70.11	69.17	18.38
1382	#15	69	2014	Male	13.2	66.38	66.16	18.38
1383	#10	59	2015	Female	14.2	66.13	66.38	17.69
1384	#10	74	2015	Male	15.1	67.48	68.95	17.69
1385	#10	67	2014	Female	16.9	66.51	68.04	18.66
1386	#10	32	2014	Female	14.9	67.73	64.53	18.66
1387	#10	12	2014	Female	14.6	67.54	56.59	18.66
1388	#10	61	2014	Male	14.6	66.75	69.84	18.66
1389	#10	47	2014	Female	13.5	67.81	67.01	18.66
1390	#10	60	2014	Female	12.7	67.82	71.32	18.66
1391	#10	27	2014	Male	14.2	67.89	62.53	18.66
1392	#10	66	2015	Male	13.1	68.97	68.44	17.69
1393	#10	56	2015	Female	12.4	66.31	64.77	17.69
1394	#10	74	2014	Female	13.2	68.04	71.98	18.66
1395	#10	48	2014	Female	14	66.07	68.38	18.66
1396	#10	44	2014	Female	13.7	67.02	66.5	18.66
1397	#10	35	2015	Female	9.4	63.88	62.91	17.69
1398	#10	42	2015	Male	11.4	64.19	64.6	17.69
1399	#10	74	2015	Female	15.3	68.14	68.47	19.69
1400	#10	46	2015	Male	13.9	65.14	67.71	17.69
1401	#10	33	2014	Female	12.5	67.29	64.43	18.66
1402	#10	60	2014	Female	12	69.11	64.6	18.66
1403	#10	39	2014	Male	12.4	65.93	64.94	18.66
1404	#10	67	2014	Female	12.4	69.41	69.15	18.66
1405	#10	37	2014	Male	13.5	66.52	63.57	18.66
1406	#10	32	2015	Female	11.1	66.15	61.62	17.69
1407	#10	46	2014	Female	12.6	67.22	67.85	18.66
1408	#10	68	2014	Female	10.9	66.59	66.99	18.66
1409	#10	51	2014	Female	13.5	67.89	64.65	18.66
1410	#10	27	2014	Female	12	66.32	64.99	18.66
1411	#10	15	2014	Male	13.2	67.02	60.85	18.66
1412	#10	25	2014	Female	15.2	67.85	61.13	18.66
1413	#10	69	2014	Female	12.4	66.27	67.36	18.66
1414	#10	37	2014	Female	12.9	67.66	67.1	18.66
1415	#10	74	2014	Female	12.6	66.33	69.96	18.66
1416	#10	39	2014	Female	14.2	67.89	66.2	18.66
1417	#10	61	2014	Male	16.6	69.44	70.04	18.66
1418	#10	67	2014	Female	14.7	70.55	69.5	18.66
1419	#10	37	2014	Female	11.3	67.27	63.96	18.66
1420	#10	42	2015	Female	14.5	66.87	65.69	17.69
1421	#10	73	2015	Male	14	68.31	68.83	17.69
1422	#10	73	2015	Male	12.4	68.15	70.26	17.69
1423	#10	54	2015	Female	13	68.47	68.02	17.69
1424	#10	61	2014	Male	13.4	68.55	66.53	18.66
1425	#10	72	2014	Female	14.5	66.71	72.83	18.66
1426	#10	47	2014	Male	11.3	66.37	66.1	18.66
1427	#10	43	2014	Female	12.5	65.92	66.8	18.66
1428	#10	17	2015	Female	15	66.31	57.23	17.69
1429	#10	54	2014	Male	11.6	67.89	64.76	18.66
1430	#10	73	2015	Male	11.1	66.31	67.97	17.69
1431	#10	19	2015	Male	13.4	65.13	61.61	17.69
1432	#10	44	2014	Male	11.6	66.32	67.55	18.66
1433	#10	63	2015	Female	13.9	63.52	67.5	16.31
1434	#10	3	2015	Female	15.2	63.54	52.71	16.24
1435	#10	3	2015	Female	15.1	64.12	53.13	17.69
1436	#10	54	2015	Male	12.6	66.35	66.19	17.69
1437	#10	19	2014	Male	12.8	67.79	60.99	18.66
1438	#14	34	2014	Female	12.4	66.22	65.09	18.25
1439	#14	6	2014	Female	14.9	67.98	49.23	18.25
1440	#14	67	2014	Male	13.2	66.43	67.04	18.25
1441	#14	12	2014	Male	9.3	66.43	52.11	18.25
1442	#14	36	2014	Male	11.7	66.87	65.06	18.25
1443	#14	74	2014	Female	15.5	68.37	71.91	18.25
1444	#14	6	2014	Female	16	66.73	58.25	18.25
1445	#14	39	2014	Female	9.7	67.03	64.92	18.25
1446	#14	61	2014	Male	12	67.31	68.79	18.25
1447	#14	46	2015	Male	11.4	67.18	60.58	18.68
1448	#14	53	2014	Male	9.2	67.78	67.4	18.25
1449	#14	71	2014	Male	12	67.05	70.03	18.25
1450	#14	24	2015	Female	12.4	65.12	63.16	17.68
1451	#14	54	2014	Female	13.8	66.78	64.85	18.25
1452	#14	1	2014	Male	12.9	66.54	59.22	20.25
1453	#14	21	2015	Female	10.1	64.19	62.95	17.68
1454	#14	21	2015	Female	10.9	66.13	62.41	17.68
1455	#14	22	2014	Female	12.2	66.57	61.87	18.25
1456	#14	61	2014	Male	12.1	65.31	63.94	18.25
1457	#14	53	2014	Female	8.9	62.65	59.43	16.34
1458	#14	39	2014	Female	10.4	64.74	63.02	18.25
1459	#14	47	2014	Male	11.7	65.79	64.39	18.25
1460	#14	68	2014	Male	14.9	66.92	66.41	18.25
1461	#14	25	2014	Female	15.6	66.32	63.43	18.25
1462	#14	26	2014	Female	14.4	66.98	62.98	18.25
1463	#14	32	2014	Male	13.2	68.28	70.37	18.25
1464	#14	57	2014	Male	15.7	69.08	72.93	18.25
1465	#14	61	2014	Female	11.4	65.87	62.17	18.25
1466	#14	48	2014	Female	11.8	66.11	63.32	18.25
1467	#14	19	2014	Male	14.8	65.32	53.07	18.25
1468	#14	32	2014	Male	12.8	66.41	62.94	18.25
1469	#14	53	2014	Female	11.2	66.02	66.16	18.25
1470	#14	2	2014	Male	14.2	66.31	57.45	18.25
1471	#14	68	2014	Female	13	65.44	64.38	18.25
1472	#14	22	2014	Female	11.9	64.96	58.58	16.25
1473	#14	58	2014	Female	13.4	64.85	61.21	17.33
1474	#14	47	2014	Male	16.8	68.79	72.35	18.25
1475	#14	47	2014	Male	12.9	66.47	69.26	18.25
1476	#14	42	2015	Male	12	68.01	60.93	18.73
1477	#14	46	2014	Female	12.9	67.64	72.05	18.25
1478	#14	74	2014	Female	14	69.01	74.7	18.25
1479	#14	66	2015	Female	13.9	69.81	70.4	17.68
1480	#14	61	2014	Male	11.3	64.18	63.9	17.25
1481	#14	10	2015	Male	14.6	65.31	58.88	17.68
1482	#14	68	2014	Female	16.4	66.32	71.66	18.25
1483	#14	39	2014	Female	11.4	66.08	62.44	18.25
1484	#14	50	2015	Male	12.4	68.15	63.53	20.17
1485	#14	69	2014	Female	9.5	65.56	63.99	18.25
1486	#14	45	2015	Male	12.6	68.17	64.1	19.64
1487	#14	29	2015	Female	13	66.38	64.03	17.68
1488	#14	43	2014	Female	13.3	66.34	64.81	18.25
1489	#14	54	2014	Female	11.4	66.76	69.99	18.25
1490	#14	74	2014	Male	14.6	68.43	74.14	18.25
1491	#14	61	2015	Male	12.9	69.85	72.18	19
1492	#14	67	2014	Male	13.5	67.14	71.22	18.25
1493	#14	67	2014	Female	13.2	66.41	66.32	18.25
1494	#14	71	2014	Male	10.4	65.47	63.49	18.25
1495	#14	55	2014	Male	9.7	65.03	59.98	18.25
1496	#14	74	2014	Male	15.2	64.1	59.61	16.31
1497	#14	22	2014	Female	10.4	65.21	63	18.25
1498	#14	57	2014	Female	12.4	65.71	65.5	17.22
1499	#16	57	2014	Female	9.1	63.69	71.21	17.17
1500	#16	55	2014	Male	12	69.59	67.69	17.82
1501	#16	58	2014	Male	10.4	65.93	66.25	17.82
1502	#16	62	2014	Female	10	61.48	73.78	16.84
1503	#16	40	2014	Female	13.5	68.24	64.23	17.82
1504	#16	71	2014	Male	13.4	67.14	70.36	17.82
1505	#16	61	2014	Female	12.3	66.16	67.48	17.82
1506	#16	74	2014	Male	12.1	69.89	76.93	19.54
1507	#16	74	2014	Male	15.3	69.92	74.39	18.85
1508	#16	71	2014	Male	9	67.35	64.19	17.82
1509	#16	60	2014	Female	9.2	65.47	69.66	17.82
1510	#16	29	2014	Female	10.6	67.65	60.12	17.82
1511	#16	64	2014	Female	10.6	66.21	66.1	17.82
1512	#16	58	2014	Female	16.6	71.29	68.82	18.34
1513	#16	54	2014	Male	11.7	66.07	67.49	17.82
1514	#16	44	2014	Female	11.1	72.9	70.28	18.82
1515	#16	69	2014	Male	8.9	67.57	73.39	17.82
1516	#16	70	2015	Male	12	65.5	66.6	17.33
1517	#16	50	2014	Male	12.2	65.34	73.53	17.82
1518	#16	57	2014	Male	13.2	58.12	67.9	15.79
1519	#16	67	2014	Female	14.7	68.01	66.38	18.94
1520	#16	25	2014	Male	11.8	68.67	62.64	17.82
1521	#16	26	2014	Female	12.3	65.28	63.03	17.82
1522	#16	39	2014	Female	13.3	69.99	65.56	18.65
1523	#16	47	2014	Male	13.4	66.7	70.44	17.82
1524	#16	72	2014	Female	12.7	64.84	72.57	17.82
1525	#16	64	2015	Female	17.9	68.04	68.66	17.33
1526	#16	53	2014	Female	13.9	67.77	71.93	17.82
1527	#16	65	2014	Female	12.2	65.24	66.52	17.82
1528	#16	67	2014	Female	8.2	68.95	70.84	17.82
1529	#16	46	2015	Male	13.3	66.25	65.41	17.33
1530	#16	71	2015	Male	12.7	67.35	71.44	17.33
1531	#16	43	2015	Female	11.3	NA	NA	19.11
1532	#16	50	2015	Male	14.1	66.97	71.49	17.33
1533	#16	60	2015	Male	12.4	70.04	74.87	18.35
1534	#16	68	2015	Male	14	68.88	69.46	17.33
1535	#16	38	2015	Female	16	72.79	69.19	20.03
1536	#16	42	2015	Male	14.6	65.14	68.84	17.33
1537	#16	49	2015	Male	15.1	72.5	71.24	19.88
1538	#16	57	2015	Female	14.1	63.71	68.45	17.03
1539	#16	63	2015	Male	16.5	65.69	67.75	17.33
1540	#16	52	2015	Male	12.7	NA	NA	19.65
1541	#16	60	2015	Female	13.9	65.89	66.56	17.33
1542	#16	66	2015	Female	12.8	68.42	66.88	19.33
1543	#16	39	2015	Female	9.8	64.52	59.02	17.33
1544	#16	31	2015	Female	12.5	70.47	63.73	18.78
1545	#16	53	2015	Male	11.8	66.03	70.01	17.33
1546	#1	74	2014	Male	15.3	67.61	65.93	18.11
1547	#1	38	2015	Male	14	83.16	51.88	20.19
1548	#1	33	2014	Female	13	67.02	66.65	18.11
1549	#1	54	2014	Male	15	67.53	67.23	18.11
1550	#1	49	2015	Female	12.8	68.35	68.43	18.25
1551	#1	39	2014	Male	12.5	68.2	67.82	18.11
1552	#1	54	2014	Male	15	67.18	70.65	18.11
1553	#1	61	2014	Female	14.3	67.37	67.18	18.11
1554	#1	68	2015	Female	12	65.77	63.39	18.25
1555	#1	74	2014	Female	14.5	66.11	67.7	18.11
1556	#1	40	2014	Female	10.4	66.04	66.47	18.11
1557	#1	47	2014	Male	10.7	67.58	65.41	18.11
1558	#1	69	2014	Female	16.5	70.03	68.12	18.11
1559	#1	53	2014	Male	13.7	66.92	66.82	18.11
1560	#1	47	2014	Female	14.8	67.59	66.13	18.11
1561	#1	64	2014	Male	16	67.92	67.39	18.11
1562	#1	67	2014	Male	16	66.98	66.71	18.11
1563	#1	53	2014	Female	14.5	67.06	67.85	18.11
1564	#1	1	2014	Female	11.4	67.31	45.95	18.11
1565	#1	23	2014	Female	13.8	66.71	66.12	18.11
1566	#1	41	2014	Female	13.6	67.44	66.71	18.11
1567	#1	48	2014	Male	11.2	66.46	66.81	18.11
1568	#1	71	2014	Male	15.7	66.59	66.69	18.11
1569	#1	37	2014	Male	13	66.55	64.56	18.11
1570	#1	40	2014	Male	13	67.42	65.5	18.11
1571	#1	46	2014	Male	14	67.23	72.53	18.11
1572	#1	72	2014	Female	15.2	66.25	68.26	18.11
1573	#1	32	2014	Female	11.8	67.02	67.31	18.11
1574	#1	33	2014	Male	13.7	67.39	62.48	18.11
1575	#1	54	2014	Female	15.4	68.97	70.51	18.11
1576	#1	73	2015	Female	NA	NA	NA	19.16
1577	#1	40	2014	Female	12.2	69.38	68.23	18.11
1578	#1	40	2015	Female	13.1	73.4	66.52	20
1579	#1	40	2015	Female	13.8	70.13	69.23	18.25
1580	#1	47	2014	Female	12.7	67.27	68.16	18.11
1581	#1	39	2014	Female	13.3	67.72	66.69	18.11
1582	#1	26	2015	Female	12	68.78	65.02	18.25
1583	#1	51	2014	Female	12.9	67.41	68.41	18.11
1584	#1	56	2015	Male	10.6	64.13	62.99	17.22
1585	#1	55	2014	Female	10.2	67.19	66.38	18.11
1586	#1	43	2015	Female	12.4	62.6	62.13	16.25
1587	#1	53	2014	Male	15.2	66.98	66.87	18.11
1588	#1	61	2014	Male	15.4	67.07	68.7	18.11
1589	#1	43	2014	Male	12.2	66.62	66.53	18.11
1590	#1	43	2015	Female	13.8	68.86	69.88	18.25
1591	#1	74	2014	Male	16.3	67.32	69.33	18.11
1592	#1	22	2015	Female	NA	64.12	62.13	17.25
1593	#1	71	2014	Male	16.6	67.44	67.95	18.11
1594	#1	71	2015	Male	13.7	NA	NA	19.34
1595	#1	5	2015	Male	11	63.38	56.2	16.23
1596	#1	24	2015	Male	15.3	NA	NA	19.46
1597	#1	24	2015	Male	NA	NA	NA	18.25
1598	#1	73	2015	Male	13.6	69.96	70.29	18.25
1599	#1	63	2015	Male	NA	68.32	58.09	18.25
1600	#1	66	2015	Female	10.9	71.81	72.85	18.25
1601	#1	8	2015	Male	9.6	63.01	57.98	16.34
1602	#1	73	2015	Female	10	64.71	59.65	18.25
1603	#1	73	2015	Male	9.8	64.4	65.68	17.39
1604	#1	11	2015	Female	15.3	64.15	57.13	17.53
1605	#1	59	2015	Male	14.6	67.93	72.73	18.25
1606	#1	57	2015	Male	13.6	72.69	71.66	18.25
1607	#1	35	2015	Male	14	71.91	66.21	19.25
1608	#1	73	2015	Female	12	66.55	68.02	18.25
1609	#1	24	2015	Female	10.9	65.34	60.68	18.25
1610	#1	67	2015	Female	15.9	69.33	74.21	19.25
1611	#1	67	2015	Female	12.9	68.02	67.17	18.25
1612	#1	7	2015	Male	11.9	NA	NA	18.25
1613	#1	38	2015	Female	10.9	68.86	66.55	18.25
1614	#1	49	2015	Female	11.8	69.65	65.67	18.25
1615	#1	67	2015	Male	13.1	67.92	69.52	18.25
1616	#1	73	2015	Female	11.9	69.4	71.38	18.25
1617	#1	36	2015	Female	10.7	66.9	67.6	18.25
1618	#1	25	2015	Female	14.3	63.71	57.41	16.32
1619	#1	42	2015	Male	10.8	69.32	69.31	18.25
1620	#1	67	2015	Female	12.2	66.01	65.98	18.25
1621	#1	24	2015	Male	10.6	69.87	65.08	18.25
1622	#1	24	2015	Male	10.6	68.63	62.52	18.25
1623	#1	4	2015	Male	15	69.45	54.45	18.25
1624	#1	38	2015	Female	12.2	NA	NA	19.44
1625	#1	17	2015	Male	12	67.4	58.96	18.25
1626	#1	25	2015	Male	13.6	66.22	58.16	18.25
1627	#1	59	2015	Male	11.5	NA	NA	18.25
1628	#1	47	2015	Male	10.6	68.72	65.41	18.25
1629	#1	54	2015	Female	10.9	64.79	64.66	17.22
1630	#1	64	2015	Female	12.4	65.95	66.91	18.25
1631	#1	45	2015	Male	11.2	67.56	66.05	18.25
1632	#1	50	2015	Male	11.5	68.1	66.07	18.25
1633	#1	28	2015	Female	NA	63.29	61.6	16.22
1634	#1	56	2015	Male	13.1	69.02	68.26	18.25
1635	#1	21	2015	Male	15.2	68.57	68.02	18.25
1636	#1	56	2015	Female	11.6	68.45	70.91	18.25
1637	#1	60	2015	Male	13.1	56.02	70.92	16.3
1638	#1	59	2015	Male	10.2	68.26	66.18	18.25
1639	#1	15	2015	Female	14.9	69.6	62.46	18.25
1640	#1	17	2015	Male	14.8	71.4	61.4	19.25
1641	#1	38	2015	Female	11.8	68.29	71.07	18.25
1642	#1	59	2015	Female	10.9	66.51	66.71	18.25
1643	#1	28	2015	Male	15.1	68.51	66.16	18.25
1644	#1	66	2015	Female	11.8	62.96	61.44	16.32
1645	#1	66	2015	Male	11.8	67.9	67.37	18.25
1646	#1	4	2015	Female	10.7	82.83	29.76	18.95
1647	#1	73	2015	Male	13.3	65.15	69.6	18.25
1648	#1	38	2015	Female	13.1	65.92	60.6	18.25
1649	#1	45	2015	Male	11.2	70.29	63.77	18.25
1650	#1	59	2015	Male	10.2	65.83	61.23	18.25
1651	#1	39	2015	Female	12.7	66.93	62.08	18.25
1652	#11	21	2015	Male	12.8	70.28	61.72	18.88
1653	#11	10	2015	Male	14.7	70.97	53.9	17.64
1654	#11	5	2015	Male	14.6	68.3	58.8	17.64
1655	#11	4	2015	Female	13.8	71.7	47.39	18.54
1656	#11	67	2015	Female	15	71.25	70.94	18.53
1657	#11	22	2015	Female	13.8	71.71	63.89	18.39
1658	#11	14	2015	Male	14.5	69.08	60.16	17.64
1659	#11	59	2015	Female	12.7	63.89	68.18	17.64
1660	#11	60	2015	Male	15.6	69.76	68.51	20.06
1661	#11	32	2015	Female	12	69.25	65.79	17.98
1662	#11	10	2015	Female	12.2	62.57	45.43	17.42
1663	#11	24	2015	Female	14	63.91	57.16	17.64
1664	#11	52	2015	Female	16.5	74.72	68.05	17.64
1665	#11	66	2015	Female	15.7	68.26	69.95	17.64
1666	#11	68	2014	Male	15.4	68.21	69.36	18.68
1667	#11	4	2015	Female	12.7	68.46	49.53	17.64
1668	#11	32	2015	Male	16.6	67.82	59.33	17.64
1669	#11	4	2015	Female	13.4	71.29	51.93	19.06
1670	#11	60	2014	Male	16.3	69.34	71.89	18.68
1671	#11	32	2015	Male	10.4	69.52	65.03	17.98
1672	#11	67	2015	Female	15	67.89	68.35	17.64
1673	#11	55	2014	Female	14	65.98	67.59	18.68
1674	#11	39	2014	Female	14	66.75	65.23	18.68
1675	#11	39	2014	Male	15.5	67.43	64.36	18.68
1676	#11	47	2014	Male	17.4	67.56	67.52	18.68
1677	#11	68	2014	Male	14	66.34	68.92	18.68
1678	#11	47	2014	Female	14.5	68.31	68.54	18.68
1679	#11	25	2014	Female	14.1	66.28	66.72	18.68
1680	#11	2	2014	Male	11.2	66.82	60.97	18.68
1681	#11	4	2014	Male	13.4	67.32	60.26	18.68
1682	#11	25	2014	Female	13.3	67.43	65.62	18.68
1683	#11	57	2014	Male	12.6	68.15	64.36	18.68
1684	#11	61	2014	Female	13.4	66.97	67.02	18.68
1685	#11	71	2015	Female	9.8	68.16	64.79	19.88
1686	#11	3	2015	Male	10.6	71.41	58.72	17.64
1687	#11	11	2014	Male	13.4	68.2	63.01	18.68
1688	#11	36	2014	Male	13.9	67.32	65.22	18.68
1689	#11	25	2014	Female	13.2	67.34	63.39	18.68
1690	#11	53	2014	Female	10.8	67.54	67.97	18.68
1691	#11	39	2014	Female	14.4	66.43	65.01	18.68
1692	#11	20	2014	Male	14.6	66.86	59.83	18.68
1693	#11	22	2014	Male	13.9	66.95	62.13	18.68
1694	#11	68	2014	Male	9.4	65.14	63.8	18.68
1695	#11	1	2015	Female	12.7	69.32	51.25	17.96
1696	#11	40	2014	Male	13.7	66.92	64	18.68
1697	#11	65	2014	Male	16.8	68.52	73.78	18.68
1698	#11	68	2014	Female	15.2	67.81	73.04	18.68
1699	#11	22	2015	Female	11.9	68.71	62.68	17.64
1700	#11	61	2014	Male	12.8	68.24	68.47	18.68
1701	#11	18	2014	Female	9.6	65.37	50.79	18.68
1702	#11	55	2014	Female	9.4	66.75	67.1	18.68
1703	#11	8	2014	Male	11.4	66.84	56.58	18.68
1704	#11	20	2014	Male	15.7	66.57	59.46	18.68
1705	#11	54	2014	Female	13.6	67.86	66.37	18.68
1706	#11	72	2014	Male	16.7	66.94	67.92	18.68
1707	#11	5	2014	Male	11.3	66.92	52.05	18.68
1708	#11	70	2015	Male	9.8	66.39	64.49	17.64
1709	#11	25	2014	Female	13.4	67.38	67.37	18.68
1710	#11	25	2014	Male	13.1	67.03	66.48	18.68
1711	#11	39	2014	Female	13.9	66.92	64.57	18.68
1712	#11	31	2015	Female	13.4	65.7	61.84	17.64
1713	#11	8	2015	Male	13.7	68.4	56.75	17.64
1714	#11	1	2015	Male	13.1	67.89	58.08	17.64
1715	#11	64	2015	Female	15.8	68.34	72.15	19.66
1716	#11	73	2015	Female	14.4	69.2	71.27	17.85
1717	#11	10	2015	Female	16.4	68.38	49.4	19.67
1718	#11	25	2015	Female	13.9	69.46	66.97	18.18
1719	#11	53	2014	Male	12.7	68.31	68.11	18.68
1720	#11	29	2014	Male	12.7	68.24	65.88	18.68
1721	#8	60	2014	Female	16.3	68.31	76.35	19.42
1722	#8	60	2014	Female	14.1	72.52	73.22	19.42
1723	#8	46	2014	Male	11	64.3	61.11	17.26
1724	#8	67	2014	Female	11.7	70.87	69.59	19.42
1725	#8	67	2014	Female	11.6	69.09	69.18	19.42
1726	#8	72	2014	Male	10.3	67.42	66.45	19.42
1727	#8	26	2014	Female	9.7	66.78	62.14	19.42
1728	#8	25	2014	Female	12.9	65.9	62.13	19.42
1729	#8	46	2014	Female	17.7	66.74	65.74	19.42
1730	#8	62	2014	Female	13.1	66.54	69.43	19.42
1731	#8	22	2015	Male	16.1	68.44	62.56	18.65
1732	#8	74	2014	Male	12.6	66.82	68.5	19.42
1733	#8	55	2014	Female	14.1	66.34	66.92	19.42
1734	#8	54	2015	Female	12.7	67.95	70.17	18.65
1735	#8	60	2014	Female	11.3	68.48	66.24	19.42
1736	#8	65	2014	Female	15.4	69.87	70.96	19.42
1737	#8	25	2014	Female	14.2	66.05	56.97	19.42
1738	#8	25	2014	Female	15.7	67.66	63.88	19.42
1739	#8	53	2014	Female	10.8	64.38	63.99	17.42
1740	#8	64	2014	Male	12.3	66.88	69.62	19.42
1741	#8	46	2015	Female	12.1	68.33	68.08	18.65
1742	#8	52	2015	Female	14.6	70.09	72.17	18.65
1743	#8	46	2014	Female	16.2	66.75	67.5	19.42
1744	#8	71	2014	Female	12.8	66.74	65.98	19.42
1745	#8	25	2014	Male	12.6	66.95	62.3	19.42
1746	#8	19	2014	Female	11.5	63.75	55.92	16.42
1747	#8	57	2014	Male	15.9	70.82	74.2	19.42
1748	#8	61	2015	Female	13.9	67.91	68.12	18.65
1749	#8	32	2015	Male	13.1	67.47	63.34	18.65
1750	#8	36	2014	Female	13.4	66.62	67.59	19.42
1751	#8	74	2014	Female	13.2	66.78	72.18	19.42
1752	#8	74	2014	Male	13.4	70.59	70.99	19.42
1753	#8	6	2014	Female	12.7	65.34	49.53	19.42
1754	#8	74	2014	Female	15.8	63.43	65.68	17.43
1755	#8	58	2014	Male	13.3	66.35	67.19	19.42
1756	#8	47	2015	Male	13.7	68.03	66.59	18.65
1757	#8	58	2014	Male	10.7	68.69	64.84	19.42
1758	#8	37	2014	Female	11.4	64.57	66.65	17.11
1759	#8	74	2015	Female	11.4	69.32	66	18.65
1760	#8	11	2015	Male	12.9	66.39	60.28	18.65
1761	#8	38	2015	Male	15	70	64.24	18.65
1762	#19	59	2015	Female	14.1	67.19	72.32	18.76
1763	#19	59	2015	Female	15.4	67.29	72.98	18.76
1764	#19	12	2015	Female	13.9	65.94	62.81	18.76
1765	#19	21	2015	Female	14.9	66.02	62.56	18.76
1766	#19	25	2015	Female	12.6	66.12	68.96	18.76
1767	#19	36	2015	Female	11.2	67.81	62.04	18.76
1768	#19	54	2015	Male	13.8	66.15	71.96	18.76
1769	#19	54	2015	Female	13.4	65.87	70.38	18.76
1770	#19	28	2015	Female	12.7	64.51	66.35	17.76
1771	#19	73	2015	Male	14.4	68.43	68.08	18.76
1772	#19	38	2015	Female	14	66.4	70.71	18.76
1773	#19	52	2015	Male	16.3	70.05	77.16	18.76
1774	#19	17	2015	Female	11	66.39	65.55	18.76
1775	#19	67	2014	Female	9.7	66.54	62.89	18.32
1776	#19	68	2014	Female	12.9	65.21	64.34	18.32
1777	#19	1	2015	Male	13.3	66.12	58.9	18.76
1778	#19	6	2014	Female	12.7	67.32	55.33	18.32
1779	#19	61	2014	Female	12.4	66.09	69.56	18.32
1780	#19	59	2015	Female	14.8	68.53	75.86	18.76
1781	#19	63	2015	Female	12.3	68.16	71.69	18.76
1782	#19	34	2014	Male	12.7	67.01	66.68	18.32
1783	#19	47	2014	Female	14.4	66.71	74.05	18.32
1784	#19	58	2014	Male	12.7	67.65	71.11	18.32
1785	#19	56	2015	Male	14.8	68.41	73.9	18.76
1786	#19	40	2014	Male	15.6	68.09	64.95	18.32
1787	#19	40	2014	Male	14.5	67.41	65.35	18.32
1788	#19	26	2014	Female	11.7	65.91	58.22	18.32
1789	#19	26	2014	Male	12.4	66.32	57.11	18.32
1790	#19	47	2014	Female	10.4	66.43	62.33	18.32
1791	#19	33	2014	Female	13.1	64.87	67.56	18.32
1792	#19	28	2015	Male	11.6	63.51	56.83	17.34
1793	#19	55	2014	Female	13.3	67.88	62.85	18.32
1794	#19	11	2015	Male	17.6	66.97	64.74	18.76
1795	#19	57	2014	Male	13.2	66.76	71.51	18.32
1796	#19	44	2014	Male	17.8	66.88	66.2	18.32
1797	#19	18	2014	Female	10.1	66.38	51.16	18.32
1798	#19	32	2015	Female	14.9	69.81	70.57	18.76
1799	#19	59	2015	Female	17.5	68.34	73.71	18.76
1800	#19	40	2015	Female	14.5	68.94	74.08	18.76
1801	#19	53	2014	Female	13.9	66.13	71.53	18.32
1802	#19	54	2014	Male	12.2	67.54	70.48	18.32
1803	#19	15	2014	Male	12.7	65.33	60.48	18.32
1804	#19	71	2014	Female	21.9	64.51	64.25	17.32
1805	#19	57	2014	Male	16.5	66.23	77.77	18.32
1806	#19	71	2014	Female	11.9	65.87	65.3	18.32
1807	#19	22	2014	Female	11.4	67.54	61.11	18.32
1808	#19	71	2014	Female	14.4	65.98	69.46	18.32
1809	#19	23	2014	Female	11	66.21	63.06	18.32
1810	#19	47	2014	Female	11.8	66.94	75.09	18.32
1811	#19	44	2014	Male	12.9	65.32	63.4	17.66
1812	#19	41	2014	Male	9.2	66.13	61.88	18.32
1813	#19	72	2014	Male	16.2	67.89	62.26	18.32
1814	#19	6	2014	Male	11.1	66.54	49.21	18.32
1815	#19	44	2014	Female	13.5	66.43	62.37	18.32
1816	#19	44	2014	Female	10.5	66.31	61.71	18.32
1817	#19	54	2015	Male	12.2	69.94	77.03	18.76
1818	#19	43	2015	Female	11.8	66.94	68.18	18.76
1819	#19	68	2014	Male	11.2	66.55	66.54	18.32
1820	#19	72	2014	Female	15.9	66.09	72.56	18.32
1821	#19	74	2014	Female	10.4	67.19	61.86	18.32
1822	#19	69	2014	Female	16.4	67.56	69.13	18.32
1823	#19	69	2014	Male	16.2	68.36	73.4	18.32
1824	#19	27	2014	Male	14.7	67.29	67.75	18.32
1825	#19	33	2014	Male	13.6	66.74	63.51	18.32
1826	#5	17	2015	Female	12.1	75.08	57.59	20
1827	#5	11	2015	Male	11.9	69.17	51.66	17.56
1828	#5	13	2015	Male	11.1	64.19	56.25	17
1829	#5	60	2015	Female	12.7	67.86	67.21	17
1830	#5	50	2015	Female	11.3	66.44	62.71	17
1831	#22	22	2015	Male	13.3	68.14	59.99	18
1832	#22	22	2015	Male	13.1	NA	NA	18.89
1833	#22	21	2015	Female	12.7	68.86	61.03	18
1834	#22	59	2015	Male	13	67.95	63.02	18
1835	#22	59	2015	Female	11.4	65.24	69.15	18
1836	#22	40	2015	Female	NA	NA	NA	18.64
1837	#22	70	2015	Female	12.9	67.67	67.45	18
1838	#22	67	2015	Female	12.4	70.3	72.03	18
1839	#22	68	2015	Male	13.8	66.12	68.83	18
1840	#22	68	2015	Male	13.6	69.71	69.36	18
1841	#22	60	2015	Male	14.7	62.62	68.38	16.58
1842	#22	68	2015	Female	11.7	72.32	70.32	19.52
1843	#22	66	2015	Female	12.5	64.14	63.38	17.03
1844	#22	60	2015	Male	12.9	64.05	62.25	16.38
1845	#18	12	2015	Male	12	64.31	59.63	17.85
1846	#18	60	2015	Female	12.9	67.2	68.89	18.89
1847	#18	5	2015	Female	9.4	NA	NA	18.89
1848	#18	68	2015	Male	11.9	66.96	69.21	18.89
1849	#18	66	2015	Female	11.7	65.28	69.96	18.89
1850	#18	66	2015	Male	13.1	65.85	71.1	18.89
1851	#2	24	2015	Female	14.1	66.31	64.89	18.88
1852	#2	22	2015	Male	11.7	71.43	62.28	18.88
1853	#2	29	2015	Female	14.7	72.63	62.38	19.68
1854	#2	5	2015	Female	11.2	64.01	42.85	16.34
1855	#2	70	2015	Female	17	67.99	72.26	18.88
1856	#2	24	2015	Male	11.7	65.61	58.64	18.88
1857	#2	73	2015	Male	12	69.99	69.58	18.88
1858	#2	7	2015	Male	11.8	71.6	55.69	18.88
1859	#2	66	2015	Male	10.1	67.86	72.43	18.88
1860	#2	50	2015	Male	15.6	65.63	66.9	18.88
1861	#2	5	2015	Female	9.5	68.14	50.75	18.88
1862	#2	59	2015	Male	12.7	66.3	66.33	17.88
1863	#2	59	2015	Male	12.6	68.35	68.57	18.88
1864	#2	70	2015	Male	13	69.66	65.9	18.88
1865	#2	70	2015	Female	11.6	67.95	70	18.88
1866	#2	73	2015	Male	10.9	70.81	68.04	18.88
1867	#2	45	2015	Female	12.9	68.46	64.52	18.88
1868	#17	14	2015	Male	9.8	63.12	58.75	16.13
1869	#17	68	2015	Male	8.9	65.26	63.51	18.5
1870	#17	42	2015	Female	12	66.39	63.69	18.5
1871	#17	19	2015	Female	14	65.31	61.84	17.5
1872	#17	57	2015	Female	11.3	67.14	63.14	18.5
1873	#3	5	2015	Male	14	66.48	54.11	19.6
1874	#3	66	2015	Male	12.4	68.79	67.1	19.6
1875	#3	56	2015	Male	15.5	69.76	71.25	19.6
1876	#3	54	2015	Male	15.7	72.34	69.14	19.6
1877	#3	56	2015	Female	12.4	68.43	70.51	19.6
1878	#3	17	2015	Female	12.3	66.98	55.6	19.6
1879	#3	39	2015	Female	11.8	66.35	62.53	19.6
1880	#3	38	2015	Female	11.2	68.87	68.32	19.6
1881	#3	74	2015	Female	12.1	68.06	66.8	19.6
1882	#3	68	2015	Female	12.7	70.94	68.02	19.6
1883	#3	38	2015	Female	12.3	69.03	67.88	19.6
1884	#3	4	2015	Male	13.7	71.64	55.51	19.6
1885	#3	63	2015	Female	14.2	69.51	66.59	19.6
1886	#3	50	2015	Female	12.8	67.87	63.57	19.6
1887	#12	24	2015	Male	12.3	69.65	65.14	18.9
1888	#12	24	2015	Male	11.9	65.33	58.88	17.15
1889	#12	10	2015	Female	10	64.88	41.82	18.5
1890	#12	73	2015	Male	13.4	67.54	72.83	18.9
1891	#12	21	2015	Male	12.7	63.27	57.41	16.35
1892	#12	54	2015	Male	10.8	65.62	64.68	18.9
1893	#12	29	2015	Female	13.3	69.43	55.68	18.9
1894	#12	22	2015	Female	9.7	65.49	60.83	18.9
1895	#12	71	2015	Female	14.4	66.55	72.62	18.9
1896	#12	39	2015	Female	14	68.9	67.27	18.9
1897	#12	10	2015	Female	11.4	64.92	42.84	17.59
1898	#20	74	2015	Male	11.6	66.67	65.09	18.25
1899	#20	54	2015	Female	11.4	69.55	67.67	18.25
1900	#20	24	2015	Female	14	66.77	66.44	18.25
1901	#20	45	2015	Male	10.4	68.59	65.98	18.25
1902	#20	31	2015	Female	11.9	70.92	64.69	18.25
1903	#20	73	2015	Male	11	67.91	57.13	18.25
1904	#20	17	2015	Female	14.7	72.37	57.93	18.25
1905	#9	40	2015	Male	15	71.96	70.17	20
1906	#9	24	2015	Male	16.8	68.35	62.42	20
1907	#9	73	2015	Male	14.8	69.12	73.32	20
1908	#9	74	2015	Female	9.9	66.57	68.66	20
1909	#9	70	2015	Female	11.5	67.92	68.64	20
1910	#9	63	2015	Male	11.4	66.98	69.04	20
1911	#9	45	2015	Male	13.2	64.23	65.43	17.22
1912	#9	49	2015	Male	13.6	63.29	66.98	16.16
1913	#9	71	2015	Male	12.5	65.39	67.82	17.42
1914	#9	1	2015	Male	12.2	66.63	57.03	20
1915	#21	57	2015	Female	14	65.22	64.8	17.1
1916	#21	25	2015	Female	12.8	63.84	69.31	17.1
1917	#21	60	2015	Female	13.8	64.07	62.47	17.1
1918	#21	59	2015	Female	11.9	65.14	63	17.1
1919	#21	42	2015	Male	11.4	63.12	62.26	17.1
1920	#21	49	2015	Female	13.3	65.89	66.38	17.1
1921	#21	50	2015	Female	14.8	68.01	70.6	18.95
1922	#21	66	2015	Male	13.5	68.72	68.47	17.1
1923	#21	70	2015	Male	12.8	67.14	63.14	17.1
1924	#21	74	2015	Female	13.6	63.29	63.24	17.1
1925	#21	24	2015	Male	8.7	64.18	59.84	17.1
1926	#21	59	2015	Female	10.9	68.01	69.4	19.23
1927	#21	73	2015	Female	12.7	62.15	59.24	16.37
1928	#15	73	2015	Male	NA	NA	NA	18.58
1929	#15	70	2015	Female	12.4	68.01	66.86	18.58
1930	#15	71	2015	Female	NA	NA	NA	18.58
1931	#15	73	2015	Female	14.1	69.86	70.16	18.58
1932	#15	38	2015	Female	9.9	64.23	56.15	17.58
1933	#15	11	2015	Female	12.7	64.15	51.88	17.58
1934	#15	67	2015	Female	12	68.72	70.25	18.58
1935	#15	73	2015	Male	10.8	66.89	65.62	18.58
1936	#15	32	2015	Female	13.8	68.97	62.7	18.58
1937	#15	11	2015	Male	12.7	66.13	59.56	18.58
1938	#15	60	2015	Female	10.4	66.39	63.39	18.58
1939	#15	61	2015	Female	12.27	66.31	63.97	18.58
1940	#15	36	2015	Male	14.7	70.15	68.14	18.58
1941	#15	43	2015	Male	12.3	66.95	62.33	18.58
1942	#15	74	2015	Male	13.7	68.79	68.7	18.58
1943	#15	10	2015	Male	14.4	67.49	58.47	18.58
1944	#15	59	2015	Female	12.7	70.51	70.58	18.58
1945	#15	19	2015	Female	12.9	66.82	57.93	18.58
1946	#15	71	2015	Male	15.6	69.13	76.13	18.58
1947	#15	14	2015	Female	13	65.47	54.82	18.58
1948	#15	38	2015	Female	12.2	66.15	65.95	18.58
1949	#10	71	2015	Male	11.6	61.23	66.81	16.28
1950	#10	46	2015	Female	11.9	67.14	67.7	17.69
1951	#10	60	2015	Male	12.1	65.43	68.76	17.69
1952	#10	71	2015	Female	16.1	66.23	69.01	17.69
1953	#10	71	2015	Female	18	63.59	66.69	17.1
1954	#10	42	2015	Female	14.9	68.17	68.31	19.31
1955	#10	68	2015	Male	15.4	68.71	68.43	17.69
1956	#10	46	2015	Female	16.8	66.23	64.02	17.69
1957	#10	50	2015	Female	13.9	65.15	64.13	17.69
1958	#10	66	2015	Male	12.7	64.53	69.62	17.69
1959	#10	45	2015	Female	9.7	67.13	66.63	17.69
1960	#10	63	2015	Female	12.4	65.12	71.3	17.69
1961	#10	66	2015	Female	14.7	68.79	67.68	17.69
1962	#14	71	2015	Female	13.7	68.17	68.8	18.97
1963	#14	70	2015	Male	15.5	68.23	67.68	17.68
1964	#14	54	2015	Female	12.9	67.18	67.08	18.56
1965	#14	59	2015	Female	13	68.12	68.75	20.3
1966	#14	66	2015	Male	11.7	67.12	69.92	17.68
1967	#14	73	2015	Female	13	66.38	67.74	17.68
1968	#14	4	2015	Female	12.6	67.84	52.3	17.68
1969	#14	59	2015	Female	13.3	68.17	67.25	19.44
1970	#14	25	2015	Female	11.9	67.89	62.4	17.68
1971	#14	46	2015	Male	9.3	67.41	64.85	17.68
1972	#14	24	2014	Male	13.2	66.55	60.96	18.25
1973	#14	46	2015	Female	11.4	68.15	67.82	20.1
1974	#14	66	2015	Male	10	65.13	64.7	17.68
1975	#14	39	2015	Female	11.9	68.72	65.1	17.68
1976	#14	46	2015	Female	10.6	66.37	65.14	17.68
1977	#14	40	2015	Female	11.1	64.13	63.04	17.04
1978	#14	53	2015	Female	14.1	69.31	69.18	17.68
1979	#14	38	2015	Female	12	65.34	69.48	17.68
1980	#14	57	2015	Female	15	68.17	70.8	19.05
1981	#14	60	2015	Male	13.6	66.11	64.68	17.68
1982	#14	39	2015	Male	13.8	65.31	65.25	17.68
1983	#14	8	2015	Male	11.2	65.29	59.83	17.68
1984	#14	5	2015	Male	12.1	68.79	61.92	17.68
1985	#14	63	2015	Male	14.1	69.41	69.3	17.88
1986	#14	28	2015	Male	12.3	67.91	64.84	17.68
1987	#14	33	2015	Female	13.4	63.15	66.9	16.66
1988	#14	10	2015	Female	13.9	66.31	52.96	17.68
1989	#14	70	2015	Male	14.1	69.73	69.41	17.68
1990	#14	5	2015	Female	13.4	65.49	50.62	17.68
1991	#14	68	2015	Male	11	68.13	70.58	17.68
1992	#14	74	2015	Male	11.9	68.15	71.01	17.68
1993	#14	15	2015	Female	12.9	66.38	58.23	17.68
1994	#14	19	2015	Female	11.5	62.11	57.3	15.99
1995	#14	3	2015	Female	11.9	63.21	48.65	16.79
1996	#14	53	2015	Male	11.6	66.89	63.39	17.68
1997	#14	40	2015	Female	11.1	67.46	61.06	17.68
1998	#14	60	2015	Female	12.4	67.89	72.29	17.68
1999	#14	38	2015	Male	13.8	66.97	60.28	17.68
[truncated: 162 more rows]

## Sheet: Hunt ground & Population data
Hunting district	Hunting ground	Agricultural land	Agricultural land	Local density (N heads/100 ha)
code	(km2)	(km2)	(%)	year 2013	year 2014	year 2015
# 1	103.25	32.61	31.59	32.9	35.38	38
# 2	132.58	42.04	31.71	22.14	20.06	19.65
# 3	76.25	18.19	23.85	23.81	21.72	23.02
# 4	46.7	12.39	26.53	14.2	15.31	13.34
# 5	105.1	39.47	37.55	15.78	15.3	12.8
# 6	92.27	16.86	18.27	17.2	13.79	13.3
# 7	63.81	11.49	18	15.78	16.13	16.86
# 8	90.76	35.29	38.88	12.7	17.86	17.9
# 9	80.44	43.38	53.92	15.41	14.1	17.9
# 10	212.89	47.09	22.12	14.2	18.17	16.18
# 11	106.73	36.03	33.76	21.52	20.15	20.15
# 12	101.05	17.85	17.67	23.16	21.3383	22.17
# 13	84.96	35.04	41.24	14.74	18.81	19.11
# 14	113.44	45.1	39.76	20.57	21.16	21.76
# 15	101.96	20.69	20.29	16.27	17.69	16.68
# 16	84.84	26.68	31.44	20.96	20.31	21.18
# 17	69.92	16.37	23.42	27.98	26.78	24.51
# 18	99.2	12.13	12.23	14.4	15.5	15.06
# 19	83.74	35.16	41.99	15.1	19.75	19.7
# 20	86.93	19.49	22.42	18.64	16.22	16.41
# 21	61.35	18.96	30.91	21.89	21.41	20.7
# 22	90.47	18.36	20.29	17.8	17.8	17.59

## Sheet: Remote sensing data
Hunting district	Forest productivity (fPAR)			Snow cover (%)
code	year 2013	year 2014	year 2015	1st winter season	2nd winter season	3rd winter season
# 1	0.598	0.619	0.652	9.22	3.58	1.29
# 2	0.624	0.631	0.656	26.17	7.59	25.01
# 3	0.604	0.624	0.647	8.73	4.57	11.65
# 4	0.64	0.655	0.673	8.48	6.95	15.81
# 5	0.596	0.621	0.65	6.78	5.83	8.08
# 6	0.652	0.662	0.687	13.85	11.28	24.69
# 7	0.62	0.671	0.681	19.4	10.72	28.79
# 8	0.573	0.594	0.606	4.37	1.85	0.59
# 9	0.63	0.656	0.682	10.11	1.16	4.84
# 10	0.588	0.624	0.631	5.85	5.4	5.27
# 11	0.618	0.642	0.641	8.31	5.3	3.5
# 12	0.602	0.612	0.637	9.04	2.41	1.57
# 13	0.643	0.643	0.656	7.53	2.27	1.79
# 14	0.578	0.636	0.626	7.04	2.83	1.26
# 15	0.642	0.639	0.655	11.8	1.59	2.81
# 16	0.604	0.621	0.644	10.75	1.31	0.68
# 17	0.613	0.642	0.663	15.09	5.96	18.47
# 18	0.654	0.663	0.677	17.24	13.77	28.36
# 19	0.571	0.578	0.597	3.12	2.85	4.52
# 20	0.617	0.639	0.652	14.4	4.63	10.26
# 21	0.618	0.63	0.632	2.97	2.43	3.59
# 22	0.638	0.674	0.68	8.75	5.56	12.34

## Sheet: Climate data
Hunting district code	Weather station code	Lat	Long	Data availability
# 1	TOS11000083	43.534	11.744	Download at: http://www.sir.toscana.it/index.php?IDS=2&IDSS=6
# 2	TOS11000026	43.75	12.275	Download at: http://www.sir.toscana.it/index.php?IDS=2&IDSS=6
# 3	Monte Fresco	43.663	11.91	Under request to Ufficio Territoriale per la Biodiversità - Pieve S. Stefano (AR) e-mail: utb.pievesantostefano@corpoforestale.it
# 4	TOS11000105	43.832	11.701	Download at: http://www.sir.toscana.it/index.php?IDS=2&IDSS=6
# 5	TOS11000105	43.832	11.701	Download at: http://www.sir.toscana.it/index.php?IDS=2&IDSS=6
# 6	TOS11000105	43.832	11.701	Download at: http://www.sir.toscana.it/index.php?IDS=2&IDSS=6
# 7	San Mariano	43.688	12.036	Under request to Ufficio Territoriale per la Biodiversità - Pieve S. Stefano (AR) e-mail: utb.pievesantostefano@corpoforestale.it
# 8	TOS11000078	43.57	11.724	Download at: http://www.sir.toscana.it/index.php?IDS=2&IDSS=6
# 9	TOS11000078	43.57	11.724	Download at: http://www.sir.toscana.it/index.php?IDS=2&IDSS=6
# 10	TOS11000038	43.373	11.89	Download at: http://www.sir.toscana.it/index.php?IDS=2&IDSS=6
# 11	TOS11000083	43.534	11.744	Download at: http://www.sir.toscana.it/index.php?IDS=2&IDSS=6
# 12	TOS11000039	43.559	12.097	Download at: http://www.sir.toscana.it/index.php?IDS=2&IDSS=6
# 13	TOS11000039	43.559	12.097	Download at: http://www.sir.toscana.it/index.php?IDS=2&IDSS=6
# 14	TOS11000112	43.32	11.797	Download at: http://www.sir.toscana.it/index.php?IDS=2&IDSS=6
# 15	TOS11000038	43.373	11.89	Download at: http://www.sir.toscana.it/index.php?IDS=2&IDSS=6
# 16	TOS11000112	43.32	11.797	Download at: http://www.sir.toscana.it/index.php?IDS=2&IDSS=6
# 17	TOS11000040	43.674	12.102	Download at: http://www.sir.toscana.it/index.php?IDS=2&IDSS=6
# 18	TOS11000105	43.832	11.701	Download at: http://www.sir.toscana.it/index.php?IDS=2&IDSS=6
# 19	TOS11000078	43.57	11.724	Download at: http://www.sir.toscana.it/index.php?IDS=2&IDSS=6
# 20	TOS11000040	43.674	12.102	Download at: http://www.sir.toscana.it/index.php?IDS=2&IDSS=6
# 21	Monte Fresco	43.663	11.91	Under request to Ufficio Territoriale per la Biodiversità - Pieve S. Stefano (AR) e-mail: utb.pievesantostefano@corpoforestale.it
# 22	TOS11000105	43.832	11.701	Download at: http://www.sir.toscana.it/index.php?IDS=2&IDSS=6
